1 Title: **Discovery of novel thrips vector proteins that bind to the plant**  
2 **bunyavirus, tomato spotted wilt virus.**

3

4 Short title (70 Characters): Identification of thrips proteins that interact with TSWV

5

6 Authors and affiliations:

7 Ismael E. Badillo-Vargas<sup>#1</sup>, Yuting Chen<sup>#2</sup>, Kathleen M. Martin<sup>2</sup>, Dorith Rotenberg<sup>2\*</sup>, and  
8 Anna E. Whitfield<sup>2\*</sup>

9 <sup>1</sup>Department of Entomology, Texas A&M AgriLife Research, Weslaco, Texas, United States  
10 of America

11 <sup>2</sup>Department of Entomology and Plant Pathology, North Carolina State University, Raleigh,  
12 North Carolina, United States of America

13

14 #IEBV and YC are joint first authors and contributed equally to this work.

15

16 \*corresponding authors

17 E-mail: [awhitfi@ncsu.edu](mailto:awhitfi@ncsu.edu), [drotenb@ncsu.edu](mailto:drotenb@ncsu.edu)

## 18 **Abstract**

19 The plant-pathogenic virus, tomato spotted wilt virus (TSWV), encodes a structural  
20 glycoprotein (G<sub>N</sub>) that, like with other bunyavirus/vector interactions, serves a role in viral  
21 attachment and possibly entry into arthropod vector host cells. It is well documented that  
22 *Frankliniella occidentalis* is one of seven competent thrips vectors of TSWV transmission to

23 plant hosts, however, the insect molecules that interact with viral proteins, such as  $G_N$ , during  
24 infection and dissemination in thrips vector tissues are unknown. The goals of this project  
25 were to identify TSWV-interacting proteins (TIPs) that interact directly with TSWV  $G_N$  and  
26 other structural proteins and to localize expression of these proteins in relation to virus in  
27 thrips tissues of principle importance along the route of dissemination. We report here the  
28 identification of six TIPs from first instar larvae (L1), the most acquisition-efficient  
29 developmental stage of the thrips vector. The TIPs were annotated and confirmed to interact  
30 with TSWV proteins, including  $G_N$  and the nucleocapsid (N) protein. Sequence analyses of  
31 these TIPs revealed homology to proteins associated with the infection cycle of other vector-  
32 borne viruses. Immunolocalization of the TIPs in L1s revealed robust expression in the  
33 midgut and salivary glands of *F. occidentalis*, the tissues most important during virus  
34 infection, replication and plant-inoculation. One of the TIPs, an endocuticular structural  
35 glycoprotein that bound  $G_N$ , co-localized with TSWV at the anterior region of the L1 midgut  
36 by 24 hours after ingestion of virus-infected plant tissue. These novel discoveries are  
37 essential for better understanding the interaction between persistent propagative plant viruses  
38 and their vectors, as well as for developing new strategies of insect pest management and  
39 virus resistance in plants.

#### 40 **Author Summary**

41 Arthropod vectors play an essential role in the dissemination of viruses that cause diseases in  
42 humans, animals, and plants. More than 70% of viruses infecting plants and 40% of viruses  
43 infecting mammals are transmitted from one host to another by arthropod vectors. For  
44 negative-sense RNA viruses, the arthropod serves as a host as well by supporting virus  
45 replication in specific tissues and organs of the vector. The goal of this work was to identify  
46 vector/host proteins that bind directly to viral structural proteins and thus may play a role in

47 the infection cycle in the insect. Using the model plant bunyavirus, tomato spotted wilt virus  
48 (TSWV), and the most efficient thrips vector, we identified and validated six TSWV-  
49 interacting proteins from *Frankliniella occidentalis* first instar larvae. One protein, an  
50 endocuticle structural glycoprotein, was able to interact directly with the TSWV attachment  
51 protein, G<sub>N</sub>. These proteins co-localized in infected insect cells, and we found a unique region  
52 of the thrips protein that bind to G<sub>N</sub>. The TSWV-interacting proteins provide new targets for  
53 disrupting the virus-vector interaction and could be putative determinants of vector  
54 competence.

## 55 **Introduction**

56 Vector-borne diseases caused by animal- and plant-infecting viruses are some of the  
57 most important medical, veterinary, and agricultural problems worldwide [1, 2]. The majority  
58 of viruses infecting plants and animals are transmitted by arthropods. Understanding the viral  
59 and arthropod determinants of vector competence is important for basic knowledge of virus-  
60 vector interactions and development of new interdiction strategies to control disease.  
61 Significant progress has been made towards identification of virus determinants of  
62 transmission, but the interacting partners in vectors remain largely elusive. For negative-  
63 sense RNA viruses, vector/host factors that mediate the transmission process have not been  
64 well characterized.

65 *Bunyvirales* is the largest order of negative-sense RNA viruses; nine families are  
66 described (<http://www.ictvonline.org/virustaxonomy.asp>). The family *Tospoviridae* contains  
67 plant and insect-vector-infecting viruses that make up the genus *Orthospovirus* [3-5].  
68 Within this genus, there are eleven species and more than fifteen unassigned viruses that most  
69 likely will be classified as unequivocal members of the *Orthospovirus* genus. *Tomato*  
70 *spotted wilt virus* (TSWV) is the model species within this genus and has been best

71 characterized in terms of viral host range, genome organization and protein functions [6, 7].

72 TSWV infects both monocotyledonous and dicotyledonous plants encompassing more  
73 than 1,000 plant species worldwide [8]. Due to the extremely wide host range, TSWV has  
74 caused severe economic losses to various agricultural, vegetable and ornamental crops. The  
75 TSWV virion has a double-layered, host-derived membrane studded with two glycoproteins  
76 ( $G_N$  and  $G_C$ ) on the surface. The viral glycoproteins play an essential role in attachment to the  
77 thrips gut and fusion of the virus and host membranes [7, 9-11]. Virus particles range in size  
78 from 80 to 120 nm in diameter, and inside the particle are three genomic RNAs designated  
79 long (L), medium (M) and small (S) RNA based on the relative size of each molecule. The L  
80 RNA is negative sense, encoding the L protein which functions as the viral RNA-dependent  
81 RNA polymerase [12], and both M and S RNAs are ambisense. The M RNA encodes both  
82 glycoproteins ( $G_N$  and  $G_C$ ) and the movement protein, NSm [13-16]. The S RNA encodes the  
83 nucleocapsid (N) protein and a RNA silencing suppressor, NSs [17-20]. The TSWV genome  
84 is encapsidated by N protein forming the ribonucleoproteins (RNPs) with a few copies of the  
85 L protein in each virus particle [7].

86 Although TSWV can be maintained in the laboratory through mechanical inoculation, it  
87 is transmitted in nature by insect vectors commonly known as thrips (Order Thysanoptera,  
88 Family *Thripidae*). Five species of *Frankliniella* and two species of *Thrips* are reported to be  
89 the vectors of TSWV [6]. Among these species, the western flower thrips, *Frankliniella*  
90 *occidentalis* Pergande, is the most efficient vector of TSWV and it has a worldwide  
91 distribution. TSWV is transmitted by thrips vectors in a persistent propagative manner, and  
92 the midgut cells and primary salivary glands are two major tissues in which TSWV replicates  
93 [21, 22]. Only thrips that acquire virus during the early larval stage are inoculative as adults  
94 [22-24]. Because the role of the viral components of the TSWV-*F. occidentalis* have been  
95 characterized, we sought to identify thrips proteins that interact directly with structural

96 components of the virion. Using gel overlay assays to identify first instar (L1) larval proteins  
97 that bind to purified virions or the G<sub>N</sub> attachment protein, we discovered six TSWV  
98 interacting proteins (TIPs) from *F. occidentalis*. Identification of these proteins using mass  
99 spectrometry was followed with secondary assays to validate the interactions. Two TIPs  
100 specifically interacted with the viral glycoprotein G<sub>N</sub> – the protein that plays a role in binding  
101 and entry into vector cells [25] – and co-localized with TSWV at the midgut of larval thrips,  
102 suggestive of molecules that may serve as receptors. These proteins represent the first thrips  
103 proteins that bind to TSWV proteins, and these novel discoveries provide insights toward a  
104 better understanding of the molecular interplay between vector and virus.

105

## 106 **Results**

### 107 **Identification of bound *F. occidentalis* larval proteins using overlay assays**

108 Proteins extracted from first instar larvae bodies were separated by 2-D electrophoresis  
109 and overlay assays were performed with purified TSWV virions or recombinant G<sub>N</sub>  
110 glycoprotein to identify bound thrips proteins. Virions identified a total of eight proteins spots  
111 (Fig 1) - three occurred consistently in all four biological replicates, while five were present  
112 in three. Mass spectrometry and subsequent peptide sequence analysis against a 454-  
113 transcriptome database (*Fo* Seq) identified one to four different transcript matches per spot  
114 (Table 1), where in four cases, the same putative transcript matched peptides in more than  
115 one spot. Using recombinant G<sub>N</sub> glycoprotein, 11 protein spots were detected in both  
116 biological replicates of the assay (Fig 2), and each spot was comprised of a single protein  
117 (single transcript match) occurring in multiple spots - there were a total of two different G<sub>N</sub>-  
118 interacting proteins represented by the 11 spots (Table 2). In an additional gel overlay assay  
119 using virus-free plant extract (mock purification) obtained from healthy *D. stramonium*

120 plants, no protein spots above the antibody control were detected (data not shown).

121  
122**Table 1. Identification of *Frankliniella occidentalis* larval proteins bound to purified virions of *Tomato spotted wilt virus* in two-dimensional (2-D) gel overlays.**

| Spot Number | <i>Fo</i> Seq contig match <sup>a</sup> | Mascot score ( $P < 0.05$ ) | Percent coverage <sup>b</sup> | Number of matched peptides | Peptide sequence(s)                                                                                                                                                                                                            | Blastx annotation <sup>c</sup> ( $E < 10^{-20}$ ) | Conserved motifs ( $E < 10^{-10}$ ) |
|-------------|-----------------------------------------|-----------------------------|-------------------------------|----------------------------|--------------------------------------------------------------------------------------------------------------------------------------------------------------------------------------------------------------------------------|---------------------------------------------------|-------------------------------------|
| 1           | contig01248                             | 279                         | 37%                           | 4                          | R.AQQPYQQYLQNQQFQNYQQR.A<br>R.AAAAAPILQYSNDVNPDGFSQYSYQTGDGISAQAAGFTR.N<br>K.DAEAQVVQGSYSYTPDGVVYTVNYIADENGYR.A<br>K.ALPPYNNQQATYQQQAAAYQR.P                                                                                   | endocuticle structural glycoprotein               | Chitin_bind_4                       |
|             | CL4854Contig1                           | 363                         | 29%                           | 7                          | R.VFFDMTVDGQPAGR.I<br>R.ALCTGEQGFQYK.G<br>R.VIPNFMCCGGDFTNHNGTGGK.S<br>R.KFADENFQLK.H<br>K.HTGPGIMSMANAGPNTNGSQFFITTVK.T<br>K.TSWLDNKHVVVFGSVIEGMDVVK.K<br>K.HVVVFGSVIEGMDVVK.K                                                | cyclophilin                                       | Cyclophilin_ABH                     |
| 2           | contig01248                             | 77                          | 10%                           | 1                          | K.DAEAQVVQGSYSYTPDGVVYTVNYIADENGYR.A                                                                                                                                                                                           | endocuticle structural glycoprotein               | Chitin_bind_4                       |
| 3           | contig00018                             | 196                         | 25%                           | 4                          | R.FGGALGGYNLAQTSQYHIQTDEGPER.Y<br>R.LEDGTVVGTYGWVDADGYLR.L<br>R.PYYPSSSTPAVSLVSSSTPR.P<br>R.PYYPTSTPAVSSSTPR.P                                                                                                                 | uncharacterized, similar to cuticular protein     | Chitin_bind_4                       |
|             | contig14634                             | 134                         | 22%                           | 3                          | R.GYISELPGTYDANSNSVIPEYDGIADVTHNGFR.Y<br>K.AGSFGYVDPFGIR.R<br>R.VIYYNTSPGSGFQVR.K                                                                                                                                              | uncharacterized, similar to cuticular protein     | none identified                     |
|             | CL4900Contig1                           | 113                         | 10%                           | 3                          | R.GYISELPGTYDANSNSVIPEYDGIADVTHNGFR.Y<br>K.AGSFGYVDPFGIR.R<br>R.VIYYNTSPGSGFQVR.K                                                                                                                                              | uncharacterized, similar to cuticular protein     | Chitin_bind_4                       |
| 4           | CL1591Contig1                           | 76                          | 5%                            | 1                          | K.QESVYTAQAIPAISTYK.K                                                                                                                                                                                                          | flexible cuticular protein                        | Chitin_bind_4                       |
| 5           | CL1591Contig1                           | 89                          | 5%                            | 1                          | K.QESVYTAQAIPAISTYK.K                                                                                                                                                                                                          | flexible cuticular protein                        | Chitin_bind_4                       |
| 6           | CL4854Contig1                           | 615                         | 30%                           | 9                          | R.VFFDMTVDGQPAGR.I<br>R.ALCTGEQGFQYK.G<br>R.VIPNFMCCGGDFTNHNGTGGK.S<br>R.KFADENFQLK.H<br>K.FADENFQLK.H<br>K.FADENFQLKHTGPGIMSMANAGPNTNGSQFFITTVK.T<br>K.HTGPGIMSMANAGPNTNGSQFFITTVK.T<br>K.HVVVFGSVIEGMDVVK.K<br>K.KVVVADCGQLS | cyclophilin                                       | Cyclophilin_ABH                     |

|   |               |     |     |    |                                                                                                                                                                                                                                                                                                                                                                                                                                            |                             |                              |
|---|---------------|-----|-----|----|--------------------------------------------------------------------------------------------------------------------------------------------------------------------------------------------------------------------------------------------------------------------------------------------------------------------------------------------------------------------------------------------------------------------------------------------|-----------------------------|------------------------------|
| 7 | CL4706Contig1 | 554 | 47% | 17 | R.GNPTVEVDLVTELGLFR.A<br>R.AAVPSGASTGVHEALELR.D<br>K.AIDNVNIIAPELIK.S<br>K.EIDELMLK.L<br>K.LGANAILGVSLAVCK.A<br>K.HIADLAGNTNIIPTPAFNVINGGSHAGNK.L<br>K.LAMQEFMILPTGASSFK.E<br>K.FGLDSTAVGDEGGFAPNILNNK.E<br>K.EGLTLIIDAIK.A<br>K.VEIGMDVAASEFYK.D<br>K.VEIGMDVAASEFYKDGQYDLDFK.N<br>K.DGQYDLDFKNPNSDK.S<br>K.LTDLYMEFIK.E<br>K.EFPMVSIEDPFDQDHWDAWTTITGK.T<br>K.TNIQIVGDDLTVTNPK.R<br>K.VNQIGSVTESIQAHLLAK.K<br>R.SGETEDTFIADLVVGLSTGQIK.T | enolase                     | Metal_binding                |
|   | contig12136   | 96  | 24% | 2  | R.QGDVVQGSYSVLEPDGSR.R<br>R.TVEYTADPVNGFNNAVVK.D                                                                                                                                                                                                                                                                                                                                                                                           | cuticular protein           | Chitin_bind_4                |
|   | contig14594   | 102 | 3%  | 1  | R.TVDYTADPVNGFNNAVVR.K                                                                                                                                                                                                                                                                                                                                                                                                                     | nuclear cap-binding protein | *RRM_NCPB2;<br>Chitin_bind_4 |
|   | CL504Contig1  | 113 | 19% | 2  | K.AAVAVDTDYDPNPSYNYAYDIHDSLTDGAK.S<br>R.TVEYTADPVNGFNNAVVK.E                                                                                                                                                                                                                                                                                                                                                                               | cuticular protein           | Chitin_bind_4                |
| 8 | CL4706Contig1 | 407 | 43% | 15 | R.GNPTVEVDLVTELGLFR.A<br>R.AAVPSGASTGVHEALELR.D<br>K.AIDNVNIIAPELIK.S<br>K.HIADLAGNTNIIPTPAFNVINGGSHAGNK.L<br>K.LAMQEFMILPTGASSFK.E<br>K.FGLDSTAVGDEGGFAPNILNNK.E<br>K.EGLTLIIDAIK.A<br>K.VEIGMDVAASEFYK.D<br>K.VEIGMDVAASEFYKDGQYDLDFK.N<br>K.DGQYDLDFKNPNSDK.S<br>K.LTDLYMEFIK.E<br>K.EFPMVSIEDPFDQDHWDAWTTITGK.T<br>K.TNIQIVGDDLTVTNPK.R<br>K.VNQIGSVTESIQAHLLAK.K<br>R.SGETEDTFIADLVVGLSTGQIK.T                                        | enolase                     | Metal_binding                |
|   | CL504Contig1  | 99  | 12% | 1  | K.AAVAVDTDYDPNPSYNYAYDIHDSLTDGAK.S                                                                                                                                                                                                                                                                                                                                                                                                         | cuticular protein           | Chitin_bind_4                |

123 <sup>a</sup>*de novo*-assembled contigs from *F. occidentalis* transcriptome derived by Roche 454/Sanger EST library hybrid (52)

124 <sup>b</sup>highest percent coverage obtained among the three picking gels used to collect protein spots for identification using ESI mass spectrometry

125 <sup>c</sup>NCBI Blastx search of the non-redundant protein database with the matching *Fo* nucleotide sequence contig query

126 <sup>\*</sup>chimeric contig (= ambiguous annotation) - domains occur in opposite orientation on different ORFs

127



128  
129

**Table 2. Identification of *Frankliniella occidentalis* larval proteins bound to recombinant glycoprotein-N (G<sub>N</sub>) in two-dimensional (2-D) gel overlays.**

| Spot Number | Fo Seq contig match <sup>a</sup> | Mascot score (P < 0.05) | Percent coverage <sup>b</sup> | Number of matched peptides | Peptide sequence(s)                                                                                                                                                                                                                                                                                          | Blastx annotation <sup>c</sup> (E < 10 <sup>-20</sup> ) | Conserved motifs (E < 10 <sup>-10</sup> ) |
|-------------|----------------------------------|-------------------------|-------------------------------|----------------------------|--------------------------------------------------------------------------------------------------------------------------------------------------------------------------------------------------------------------------------------------------------------------------------------------------------------|---------------------------------------------------------|-------------------------------------------|
| 1           | CL4310Contig1                    | 595                     | 27%                           | 12                         | R.AAELSSILEER.I<br>K.NIQADEMVEFSSGLK.G<br>K.GMALNLEPDNVGIVVFGNDK.L<br>K.GMALNLEPDNVGIVVFGNDKLIK.E<br>R.TGAIVDVPVGDLLGR.V<br>K.TALAIIDTIINQQR.F<br>K.YTIIVAATASDAAPLQYLAPYSGCAMGEYFR.D<br>K.HALIIYDDLSK.Q<br>R.EAYPGDVVFLHSR.L<br>R.EVAFAQFGSDLLDAATQQLLNR.G<br>K.QGQYVPMIIEEQVAVIYCGVR.G<br>K.IVTDFLASFNAASK | mitochondrial<br>ATP synthase α<br>subunit              | AtpA                                      |
| 2           | CL4310Contig1                    | 302                     | 12%                           | 5                          | K.GMALNLEPDNVGIVVFGNDK.L<br>R.TGAIVDVPVGDLLGR.V<br>R.VVDALGDAIDGK.G<br>K.HALIIYDDLSK.Q<br>K.IVTDFLASFNAASK                                                                                                                                                                                                   | mitochondrial<br>ATP synthase α<br>subunit              | AtpA                                      |
| 3           | CL4382Contig1                    | 633                     | 43%                           | 9                          | R.SSVVSQVVPVSK.T<br>K.SVPQYQQYQTVSQYQSVQYQQQVVK.S<br>K.SVPQYQQVVK.S<br>K.SAPVYSQVHHVVEQQAAPVLLR.H<br>R.TAFVPQYDSVSVSASAQPK.Y<br>K.ILSQVEFDPAgiYR.V<br>R.VNFQTENGIQSAETGSVK.D<br>R.ASGAHLPOVPEIQR.S<br>R.SLELNAAQPQKYDQDGNLVSQF                                                                               | endocuticle<br>structural<br>glycoprotein               | Chitin_bind_4                             |
| 4           | CL4382Contig1                    | 137                     | 15%                           | 3                          | R.SSVVSQVVPVSK.T<br>K.SVPQYQQYQTVSQYQSVQYQQQVVK.S<br>R.VNFQTENGIQSAETGSVK.D                                                                                                                                                                                                                                  | endocuticle<br>structural<br>glycoprotein               | Chitin_bind_4                             |
| 5           | CL4382Contig1                    | 169                     | 22%                           | 6                          | R.SSVVSQVVPVSK.T<br>K.SVPQYQQVVK.S<br>R.VNFQTENGIQSAETGSVK.D<br>R.ASGAHLPOVPEIQR.S<br>R.AAAEHGVAIVCPDTSR.G<br>K.ACQAVNMPVVLQMR.E                                                                                                                                                                             | endocuticle<br>structural<br>glycoprotein               | Chitin_bind_4                             |
| 6           | CL4382Contig1                    | 1,154                   | 53%                           | 11                         | R.SSVVSQVVPVSK.T<br>K.SVPQYQQYQTVSQYQSVQYQQQVVK.S<br>K.SVPQYQQVVK.S<br>K.SAPVYSQVHHVVEQQAAPVLLR.H<br>R.HVEQEIPAYQSVQHVHQPVYQSVQHVAHHVAAPVVS.R.T<br>R.TAFVPQYDSVSVSASAQPK.Y<br>K.ILSQVEFDPAgiYR.V<br>R.VNFQTENGIQSAETGSVK.D                                                                                   | endocuticle<br>structural<br>glycoprotein               | Chitin_bind_4                             |

|    |               |     |     |   |                                                                                                                                                                                                                  |                                           |               |
|----|---------------|-----|-----|---|------------------------------------------------------------------------------------------------------------------------------------------------------------------------------------------------------------------|-------------------------------------------|---------------|
|    |               |     |     |   | R.VNFQTENGIQSAETGSVKDIQAK.D<br>R.ASGAHLQPVPPEIQR.S<br>R.SLELNAAQPQKYDQDGNLVSQF                                                                                                                                   |                                           |               |
| 7  | CL4382Contig1 | 413 | 74% | 8 | R.SSVVSQSVPVVSK.T<br>K.SVPQYQQYQTVSQQYQSVPPYQQQVVVK.S<br>K.SVPQYQQQVVVK.S<br>R.TAFVPPYDSVSVSASAQPK.Y<br>R.VNFQTENGIQSAETGSVK.D<br>R.VNFQTENGIQSAETGSVKDIQAK.D<br>R.ASGAHLQPVPPEIQR.S<br>R.SLELNAAQPQKYDQDGNLVSQF | endocuticle<br>structural<br>glycoprotein | Chitin_bind_4 |
| 8  | CL4382Contig1 | 355 | 29% | 7 | R.SSVVSQSVPVVSK.T<br>K.SVPQYQQYQTVSQQYQSVPPYQQQVVVK.S<br>K.SVPQYQQQVVVK.S<br>R.VNFQTENGIQSAETGSVK.D<br>R.VNFQTENGIQSAETGSVKDIQAK.D<br>R.ASGAHLQPVPPEIQR.S<br>R.SLELNAAQPQKYDQDGNLVSQF                            | endocuticle<br>structural<br>glycoprotein | Chitin_bind_4 |
| 9  | CL4382Contig1 | 155 | 5%  | 2 | R.VNFQTENGIQSAETGSVK.D<br>R.VNFQTENGIQSAETGSVKDIQAK.D                                                                                                                                                            | endocuticle<br>structural<br>glycoprotein | Chitin_bind_4 |
| 10 | CL4382Contig1 | 130 | 4%  | 1 | R.VNFQTENGIQSAETGSVK.D                                                                                                                                                                                           | endocuticle<br>structural<br>glycoprotein | Chitin_bind_4 |
| 11 | CL4382Contig1 | 150 | 13% | 7 | R.SSVVSQSVPVVSK.T<br>K.SVPQYQQYQTVSQQYQSVPPYQQQVVVK.S<br>K.SVPQYQQQVVVK.SR.VNFQTENGIQSAETGSVK.D<br>R.TAFVPPYDSVSVSASAQPK.Y<br>R.VNFQTENGIQSAETGSVK.D<br>R.VNFQTENGIQSAETGSVKDIQAK.D<br>R.ASGAHLQPVPPEIQR.S       | endocuticle<br>structural<br>glycoprotein | Chitin_bind_4 |

130 <sup>a</sup> *de novo*-assembled contigs from *F. occidentalis* transcriptome derived by Roche 454/Sanger EST library hybrid (52)

131 <sup>b</sup> highest percent coverage obtained among the three picking gels used to collect protein spots for identification using ESI mass spectrometry

132 <sup>c</sup> NCBI Blastx search of the non-redundant protein database with the matching *Fo* nucleotide sequence contig query

133

### 134 **Annotation of six candidate TSWV-interacting proteins**

135 Our stringent sequence-filtering criteria retained four different virion-interacting proteins  
136 [endocuticle structural glycoprotein: endoCP-V (contig01248, GenBank accession:  
137 MH884756); cuticular protein: CP-V (CL4900Contig1, MH884758), cyclophilin  
138 (CL4854Contig1, MH884760), and enolase (CL4706Contig1, MH884759), Table 1] and two  
139 G<sub>N</sub>-interacting proteins [mitochondrial ATP synthase  $\alpha$  (CL4310Contig1, MH884761) and  
140 endocuticle structural glycoprotein; endoCP-G<sub>N</sub> (CL4382Contig1, MH884757), Table 2] to  
141 move forward to validation and biological characterization. Collectively, these six protein  
142 candidates are referred to as ‘TSWV-Interacting Proteins’ or TIPs and their putative  
143 identifications and sequence features are shown in Table 3. Blastp analysis of the predicted,  
144 longest complete ORFs confirmed their annotations and putative sequence homology to  
145 proteins in other insects. The three cuticle-associated proteins (endoCP-G<sub>N</sub>, endoCP-V, and  
146 CP-V) contained predicted signal peptide sequences, indication of secreted proteins, and a  
147 chitin-binding domain (CHB4). Pairwise alignments (Blastp) between the ORFs of these  
148 three cuticle proteins and the partial CPs and endoCPs identified in the gel overlays revealed  
149 diversity in these thrips proteins; three had no matches to others, and where matches  
150 occurred, % identities ranged from 53% – 67%, covering 30% – 49% of the queries, with e-  
151 values ranging from  $2.4 \times 10^{-2}$  –  $3.6 \times 10^{-24}$ . The only exception was the CP-V and  
152 contig00018 alignment, which appeared to be 100% identical along the entire length of  
153 contig00018 ( $E = 2.6 \times 10^{-162}$ ). The other three TIPs (cyclophilin, enolase and mATPase)  
154 contained motifs characteristic of these proteins (Table 3).

155 **Table 3. Final candidate list of six TSWV-interacting proteins (TIPs)<sup>a</sup> from larval *Frankliniella occidentalis* to move forward to**  
 156 **validation and biological characterization.**

| Putative protein                                                            | Fo Seq contig match <sup>b</sup> | ORF length <sup>c</sup> (nt/aa) | Signal peptide <sup>d</sup> (aa position) | Conserved domains <sup>e</sup>                     |                                        |                                                                          | Top Genbank match <sup>f</sup> (% coverage, % identity, E)                                                                         |
|-----------------------------------------------------------------------------|----------------------------------|---------------------------------|-------------------------------------------|----------------------------------------------------|----------------------------------------|--------------------------------------------------------------------------|------------------------------------------------------------------------------------------------------------------------------------|
|                                                                             |                                  |                                 |                                           | Name                                               | Position (aa)                          | E-value                                                                  |                                                                                                                                    |
| Cuticular protein-V (CP-V)                                                  | CL4900Contig1                    | 1,302/434                       | 1-18                                      | Chitin_bind_4                                      | 447-92                                 | 5.7x10 <sup>-6</sup>                                                     | XP_017786818.1: PREDICTED cell surface glycoprotein 1 [ <i>Nicrophorus vespilloides</i> ] (94%, 44%, 1x10 <sup>-85</sup> )         |
| Endocuticle structural glycoprotein-G <sub>N</sub> (endoCP-G <sub>N</sub> ) | CL4382Contig1                    | 852/283                         | 1-15                                      | Chitin_bind_4                                      | 190-246                                | 7.5x10 <sup>-11</sup>                                                    | XP_018334183.1: endocuticle structural glycoprotein SgAbd1 like [ <i>Agrilus planipennis</i> ] (33%, 53%, 4x10 <sup>-22</sup> )    |
| Endocuticle structural glycoprotein-V (endoCP-V)                            | contig01248                      | 522/173                         | 1-17                                      | Chitin_bind_4                                      | 63-119                                 | 1.4x10 <sup>-18</sup>                                                    | XP_022906571.1: endocuticle structural glycoprotein SgAbd1 like [ <i>Onthophagus taurus</i> ] (63%, 58%, 2x10 <sup>-35</sup> )     |
| Cyclophilin (peptidyl-prolyl cis-trans isomerase)                           | CL4854Contig1                    | 618/205                         | None                                      | cyclophilin_ABH_ like<br>PpiB<br>Pro_isomerase     | 44-202<br>57-196<br>47-201             | 2.3x10 <sup>-120</sup><br>2.6x10 <sup>-63</sup><br>1.2x10 <sup>-62</sup> | XP_019753975.1: PREDICTED peptidyl-prolyl cis-trans isomerase [ <i>Dendroctonus ponderosae</i> ] (99%, 75%, 2x10 <sup>-109</sup> ) |
| Enolase                                                                     | CL4706Contig1                    | 1,302/433                       | None                                      | PLN00191<br>enolase<br>Eno<br>Enolase_C            | 3-433<br>5-417<br>6-431<br>143-433     | 0<br>0<br>0<br>0                                                         | XP_019767728.1: PREDICTED enolase-like [ <i>Dendroctonus ponderosae</i> ] (99%, 87%, 0)                                            |
| Mitochondrial ATP synthase $\alpha$                                         | CL4310Contig1                    | 1,665/554                       | None                                      | PRK09281<br>AtpA<br>F1_ATPase_alpha<br>ATP-synt_ab | 45-551<br>45-553<br>135-416<br>190-413 | 0<br>0<br>0<br>6.1x10 <sup>-117</sup>                                    | XP_023718907.1: ATP synthase subunit alpha, mitochondrial [ <i>Cryptotermes secundus</i> ] (99%, 89%, 0)                           |

188 <sup>a</sup>sequences deposited into National Center for Biotechnology Information (NCBI) GenBank with the following accessions: CP-V (MH884758), endoCP-G<sub>N</sub> (MH884757),  
 189 endoCP-V (MH884756), cyclophilin (MH884760), enolase (MH884759), and mitochondrial ATP synthase  $\alpha$  (MH884761).

190 <sup>b</sup>*de novo*-assembled contigs from *F. occidentalis* transcriptome derived by Roche 454/Sanger EST library hybrid (52)

191 <sup>c</sup>prediction by NCBI ORF Finder (<https://www.ncbi.nlm.nih.gov/orffinder/>)

192 <sup>d</sup>prediction by Signal P (<http://www.cbs.dtu.dk/services/SignalP/>)

193 <sup>e</sup>prediction by NCBI Batch Web CD Search Tool (<https://www.ncbi.nlm.nih.gov/Structure/bwrpsb/bwrpsb.cgi>) (CDSEARCH/cdd v3.16); E-value cut-off = 10<sup>-5</sup>, only  
 194 specific hits shown

195 <sup>f</sup>Blastp search of NCBI nr protein database against TIP ORF as of August 06, 2018; top match indicates highest alignment (max) score

196 **Classification of cuticular TIPs**

197 All three cuticular TIPs were classified as members of the Cuticle Protein - R&R  
198 Consensus motif (CPR) family [26] based on the occurrence of one RR extended consensus  
199 CHB4, with both endoCP-G<sub>N</sub> ( $E = 4 \times 10^{-18}$ ) and endoCP-V ( $E = 1 \times 10^{-26}$ ) predicted to  
200 belong to the RR1 group, and CP-V weakly supported ( $E = 5 \times 10^{-6}$ ) to belong to the RR2  
201 group of CPRs. All three sequences were phylogenetically placed into the RR1 major clade  
202 with strong bootstrap support (82%, S1 Fig) in relation to other *F. occidentalis* CPRs  
203 previously found to be downregulated in TSWV-infected first instar larvae [27] and CPRs of  
204 other insect species. Within the RR1 clade, the CP-V CHB4 domain clustered with a CP of  
205 the small brown planthopper, *Laodelphax striatella* (KC485263.1, CprBJ), reported to bind to  
206 the nucleocapsid protein pc3 of rice stripe virus (RSV) during infection of the vector [28] and  
207 which was predicted ( $E = 5 \times 10^{-7}$ ) to be classified in the RR1 group.

208

209 **Validation of gel overlay protein-protein interactions using yeast two-hybrid analysis**

210 Both Gal4 transcriptional activator-based and membrane-based yeast two-hybrid  
211 (MbY2H) systems were applied and repeated three times to validate the gel-overlay  
212 interactions between the six candidate TIPs and TSWV nucleocapsid (N) protein and  
213 glycoprotein G<sub>N</sub>. Given TSWV N is soluble, both Y2H systems were applied, and both  
214 systems revealed strong interactions between TSWV N and each of the six TIPs; only the  
215 MbY2H assay results are presented in Fig 3A. The N-TIPs interactions were confirmed by  $\beta$ -  
216 galactosidase assay (S1 Table).

217 We used the MbY2H system to validate TSWV G<sub>N</sub> interactions with the TIPs due to the  
218 presence of a transmembrane domain near the C-terminus of TSWV G<sub>N</sub>. The interaction  
219 between G<sub>N</sub> and endoCP-G<sub>N</sub> was consistent and strong based on the number of colonies

220 growing on QDO - more than 1,000 colonies on all QDO plates for all replicates (Fig 3B) -  
221 and this interaction was confirmed by  $\beta$ -galactosidase assay (S2 Table). We detected a weak  
222 interaction (average of 15 colonies) between  $G_N$  and cyclophilin, however, seven of nine  
223 colonies tested by  $\beta$ -galactosidase assay were positive. Consistent with the gel overlay  
224 findings, the remaining four TIPs showed no interaction with  $G_N$  using MbY2H.

225

226

### 227 **The non-conserved region of endoCP- $G_N$ binds TSWV $G_N$**

228 Given the role of  $G_N$  as the viral attachment protein in the larval thrips midgut epithelium  
229 [7, 10] and the confirmed direct interaction between endoCP- $G_N$  and TSWV  $G_N$ , there was  
230 interest in broadly identifying the amino acid region in the endoCP- $G_N$  sequence that binds  
231 viral  $G_N$ . We hypothesized that the non-conserved region of endoCP- $G_N$  (N-terminal region  
232 up to 176 aa or 189 aa) and not the CHB4 motif might play an important role in the  
233 interaction with TSWV  $G_N$ . Using the MbY2H system, it was determined that the non-  
234 conserved region of the endoCP- $G_N$  sequence had as strong of an interaction with TSWV  $G_N$   
235 as the complete endoCP- $G_N$  sequence (Fig 3C and S2 Table) - more than 500 colonies on  
236 each QDO plate for each experimental replicate – while the predicted CHB4 motif alone  
237 (amino acid positions 190-284) or CHB4 plus few amino acids upstream (position 177-284) )  
238 did not show an interaction. The non-conserved endoCP- $G_N$  sequence region was determined  
239 to have no significant matches to sequences in NCBI non-redundant nucleotide and protein  
240 databases.

241

### 242 **Validation of interactions between TIPs and TSWV using BiFC**

243 Before launching a BiFC analysis of candidate protein interactions *in planta*, it is critical  
244 to determine if position of a fused fluorescent protein tag (N- or C-terminus of the candidate

245 protein) affects the expression and/or localization of the fusion protein in cells. Furthermore,  
246 it was expected that the signal peptides located on the N-terminus of the soluble ( $G_C$ -S and  
247  $G_N$ -S) and insoluble ( $G_C$  and  $G_N$ ) TSWV glycoproteins, and the cuticular TIPs (CP-V,  
248 endoCP-V, endoCP- $G_N$ ), would preclude placement of tags at the N-terminus of these  
249 proteins. We determined that position of the GFP tag on TSWV N did not appear to effect  
250 expression or localization of the fusion protein in *N. benthamiana* cells. However, GFP fused  
251 to the N-terminus of the glycoproteins ( $G_N$ ,  $G_N$ -S,  $G_C$  and  $G_C$ -S), the cuticle TIPs (endoCP-  
252  $G_N$  and endoCP-V), and mATPase  $\alpha$  produced weak signal or reduced mobility in the cell  
253 (data not shown). Thus, protein localization and BiFC validation experiments were performed  
254 with C-terminally fused TIPs.

255 The GFP-TIP fusion proteins displayed some differences in their cellular localization  
256 patterns (S2 Fig). Cyclophilin and mATPase  $\alpha$  appeared to be localized to the nuclei and  
257 along the cell periphery, while enolase and CP-V were present in the membranes surrounding  
258 the nuclei as well as the cell periphery. Both endoCP- $G_N$  and endoCP-V had a punctate  
259 appearance outside of the nucleus. All three cuticular TIPs (CP-V, endoCP- $G_N$ , endoCP-V)  
260 formed small bodies that appeared to be moving along the endo-membranes of the cell,  
261 consistent with secretion. All TIPs were co-localized with the ER marker; however, none  
262 appeared to be co-localized with the Golgi marker (data not shown).

263 With a few exceptions, BiFC analysis validated the TSWV - TIP interactions (Fig 4).  
264 Consistent with the MbY2H findings, TSWV N protein interacted with cyclophilin,  
265 mATPase  $\alpha$ , CP-V, endoCP-V and endoCP- $G_N$ , and  $G_N$  interacted with endoCP- $G_N$ . Contrary  
266 to MbY2H results, there was no apparent interaction between TSWV N and enolase, and  $G_N$   
267 was determined to have additional interactions with enolase and endoCP-V. The steric  
268 constraints imposed by the position (C- or N-terminus) of the reporter in the BiFC (YFP half)  
269 and MbY2H (Ubiquitin half) systems in plants vs yeast cells, respectively, may explain the

270 contrasting interactions. The soluble forms of the viral glycoproteins produced some varying  
271 results from their insoluble counterparts: G<sub>N</sub>-S interacted with mATPase  $\alpha$  and endoCP-V  
272 (and not endoCP-G<sub>N</sub>), and G<sub>C</sub> did not interact with any of the six TIPs but G<sub>C</sub>-S interacted  
273 with Cp-V. All of the BiFC interactions were detected in the membranes surrounding the  
274 nuclei and at the cell periphery, generally consistent with the localization patterns of the  
275 GFP-fused TIPs as described for the localization experiment above (S2 Fig).

### 276 **In vivo localization of TIPs in *F. occidentalis* tissues**

277 Specific antisera raised against each confirmed TIP was used in immunolabeling  
278 experiments to localize protein expression in L1 tissues *in vivo*. Visualization by confocal  
279 microscopy revealed that all six TIPs were primarily localized at the foregut (esophagus),  
280 midgut (epithelial cells and visceral muscle), salivary glands (including both primary and  
281 tubular salivary glands), and Malpighian tubules (Fig 5), and this was the case in 100% of the  
282 dissected tissues treated with TIP-specific antisera. It was difficult to completely dissect and  
283 separate hindgut from the carcass without damaging the tissue, therefore, the localization of  
284 TIPs at the hindgut was unclear. All controls labeled with pre-immune serum for each TIP  
285 showed slightly higher background than the no antibody control, therefore, the confocal laser  
286 settings (power and percent/gain) were adjusted to remove any background fluorescence  
287 observed for these treatments. The bright field and merged images of these controls,  
288 depicting actin- and nuclei-labeling, are shown in S3 Fig.

### 289 **In vivo co-localization of G<sub>N</sub>-interacting TIPs and TSWV in *F. occidentalis* tissues**

290 Virus acquisition experiments were conducted to determine localization of TSWV in  
291 relation to endoCP-G<sub>N</sub> and cyclophilin expression in larval thrips. After each AAP (24, 48  
292 and 72 hours of exposure), dissected tissues were incubated with TSWV and TIP-specific  
293 antisera and viewed by confocal microscopy. At the 24 hour-virus exposure, virus infection



294 was limited to a few midgut epithelial cells in the anterior region of the midgut (MG1)  
295 adjacent to the cardiac valve. With increasing virus exposure time, TSWV was observed in  
296 increasingly more of the epithelium and into the visceral muscle cells of MG1 (48 hrs and 72  
297 hrs). Consistent with the localization of TIPs expressed in healthy young L1s obtained from  
298 the lab colony (Fig 5), cyclophilin and endoCP-G<sub>N</sub> were expressed widely throughout larval  
299 midgut tissues (epithelial cells and visceral muscle) regardless of treatment (non-exposed and  
300 TSWV-infected) and exposure time to virus (Fig 6). Both TIPs were co-localized with virus  
301 (Fig 6), which was consistently observed for all of the TSWV G<sub>N</sub>-labeled tissues examined  
302 (13, 9 and 15 intact tissues for endoCP-G<sub>N</sub> experiments, and 7, 7, and 8 intact tissues for  
303 cyclophilin experiments for the three AAPs, respectively). Although TIPs were expressed  
304 throughout the entire midgut tissue system, not all epithelial cells were labeled positive for  
305 TSWV G<sub>N</sub>, consistent with the normal progression of TSWV infection in thrips [29]. As for  
306 SGs, both TIPs were expressed in these tissues in both treatments, however no virus was  
307 detected in the SGs of the early second instar larvae comprising the 72-hr samples. At the  
308 confocal level, we did not detect a change in endoCP-G<sub>N</sub> or cyclophilin expression in  
309 infected insects compared to non-infected insects. The no-virus controls - actin and nuclei-  
310 stained, bright field and the merged panels - are shown in S4 Fig.

## 311 **Discussion**

312 With the creation of transcriptome sequence resources for *F. occidentalis* and improved  
313 proteomics technologies, we have identified the first thrips proteins that bind directly to  
314 major structural proteins of TSWV. With particular relevance to viral attachment to epithelia,  
315 one TIP (endocuticle structural glycoprotein, endoCP-G<sub>N</sub>) was confirmed consistently to  
316 interact directly with G<sub>N</sub>, it was abundant in midgut and salivary gland tissues, and it co-  
317 localized with TSWV 24-hours post exposure at the anterior region of larval midguts - the

318 initial site of infection [29]. These data may be the first indication of a protein that serves  
319 'receptor-like' roles in transmission biology of a plant-infecting member of the Bunyavirales.  
320 We narrowed down the G<sub>N</sub>-binding region to the amino terminal region of endoCP-G<sub>N</sub>  
321 excluding the conserved CHB4 domain, setting the stage for future work to decipher the  
322 essential amino acids within the non-conserved region necessary to establish the interaction.  
323 With regards to other virus activities mediated by bunyavirus nucleocapsid (N) proteins in  
324 host cells, the confirmed affinity of TSWV N to five of the six TIPs, including endoCP-G<sub>N</sub>,  
325 may indicate interactive host factors involved with N-associated roles, such as viral  
326 transcription, replication, and/or virion maturation in animal [30, 31] and plant hosts [32, 33].  
327 Evidence of the cell peripheral (mATPase, cyclophilin, endoCP-G<sub>N</sub>, endoCP-V, CP-V) or  
328 perinuclear (cyclophilin) accumulation and co-localization of these five TIPs with N in the  
329 BiFC assay support this hypothesis.

330       The most enriched thrips proteins in the initial screen for those bound to virions or G<sub>N</sub>  
331 (Table 1 and 2, 72%) were cuticular proteins. Cuticular proteins are well characterized as  
332 major components of insect hard and soft cuticles [34, 35]. Soft cuticles have been  
333 documented to line the insect foregut and hindgut [36, 37], and an EM study documented  
334 cuticle lining of the accessory and primary salivary gland (SG) ducts of *F. occidentalis* [38].  
335 In silico sequence analysis of the three cuticular TIPs (CP-V, endo-V, endo-G<sub>N</sub>) revealed  
336 conserved CHB4 domains (R&R) suggesting their binding affinity to chitin (heteropolymer  
337 of N-acetyl-β-D-glucosamine and glucosamine), also a major component of cuticles and  
338 peritrophic membranes (PM) lining the midgut epithelium of most insects [39]. Hemipteran  
339 and thysanopteran midguts lack PMs, and are instead lined with perimicrovillar membranes  
340 (PMM) [40, 41] - these structures have been reported to contain lipoproteins, glycoproteins  
341 and carbohydrates [42, 43] and more recently, one study documented the occurrence and  
342 importance of chitin in the PMM of *Rhodnius prolixus* (kissing bug) midguts, marking the

343 first hemipteran midgut reported to contain chitin [44]. Since all three cuticular TIPs were  
344 highly expressed in the midgut and SGs of larval *F. occidentalis* in the present study, we  
345 hypothesize that chitin or chitin-like structures may impregnate the thrips PMM and SG-  
346 linings, forming a matrix with endoCPs - however, this remains to be empirically determined.  
347 Alternatively, the thrips TIPs annotated as cuticle proteins with predicted chitin-binding  
348 domains may have yet-undescribed functions in insect biology.

349       Cuticular proteins are emerging as important virus interactors and responders in diverse  
350 vector-borne plant virus systems. A CP of the hemipteran vector, *Laodelphax striatellus*, was  
351 found to interact with the nucleocapsid protein (pc3) of *Rice stripe virus* (genus *Tenuivirus*,  
352 order *Bunyavirales*) and was hypothesized to be involved in viral transmission and to  
353 possibly protect the virus from degradation by a host immune response in the hemolymph  
354 [28]. Recently, a CP of another hemipteran vector, *Rhopalosiphum padi*, was identified to  
355 interact with *Barley yellow dwarf virus-GPV* (genus *Luteovirus*, family *Luteoviridae*)  
356 readthrough protein, and the gene transcript of this particular CP was differentially expressed  
357 in viruliferous compared to virus-free aphids [45]. At the transcript level, thrips cuticular  
358 proteins of different types - including the thrips CPRs used in the present study to  
359 phylogenetically place the three cuticular TIPs - were identified to be downregulated in  
360 TSWV-infected first instar larvae [27]. Although the three cuticular TIPs identified in the  
361 present study were not reported in the previous study to be differentially-responsive to virus,  
362 both implicate cuticle-associated proteins during the early infection events of TSWV in the  
363 thrips vector.

364       Cyclophilins, also known as peptidyl-prolyl cis-trans isomerases, are ubiquitous proteins  
365 involved in multiple biological processes, including protein folding and trafficking, cell  
366 signaling, and immune responses [46]. They have also been shown to promote or prevent  
367 virus infection [47, 48], for example, cyclophilin A was found to bind to viral RNA to inhibit

368 replication of *Tomato bushy stunt virus* (*Tombusviridae: Tombusvirus*) in plant leaf cells [49],  
369 while cyclophilins of the aphid vector *Schizaphis graminum* have been shown to play an  
370 important role in *Cereal yellow dwarf virus* (*Luteoviridae: Polerovirus*) transmission [50].  
371 Interactions between the thrips cyclophilin TIP (with N and G<sub>N</sub>) documented in the present  
372 study may affect similar virus processes, such as virus replication and maturation, or thrips  
373 transmission and vector competence [50, 51]. The same cyclophilin was determined to be  
374 down-regulated in *F. occidentalis* first instar larvae during TSWV infection [52], adding to  
375 the body of evidence that viruses modulate expression of cyclophilins [53-58]. Others have  
376 proposed that negative strand virus matrix proteins – structural proteins that package viral  
377 RNA - evolved from cyclophilins [59]; however, bunyaviruses do not encode a matrix  
378 protein. One hypothesis for the direct interaction between the cyclophilin TIP with N and G<sub>N</sub>  
379 may be to facilitate RNP packing into the virus particle, perhaps serving as a surrogate matrix  
380 protein for TSWV.

381 Like cyclophilins, enolases of diverse hosts have been identified as both responsive to  
382 and interactive partners with viruses. In general, enolases are essential metalloenzymes that  
383 catalyze the conversion of 2-phosphoglycerate (2-PGE) to phosphoenolpyruvate (PEP) in the  
384 glycolytic pathway for energy metabolism [60]. Some are matrix metalloproteases known to  
385 cleave cell surface receptors, modulate cytokine or chemokine activities, or release apoptotic  
386 ligands by degrading all types of extracellular matrix proteins, such as collagen, elastin,  
387 fibronectin, laminin, gelatin, and fibrin [61]. The enolase TIP identified in the present study  
388 was previously reported to be up-regulated in L1 bodies infected with TSWV [52], as was the  
389 case for enolase in response to RSV in bodies of the hopper vector, *L. striatellus* [62]. In the  
390 case of flaviviruses, *Aedes aegypti* enolase was shown to directly interact with purified virus  
391 and recombinant envelope GP of dengue virus [63] and West Nile virus envelope protein  
392 [64]. The localization of this enolase in brush border membrane vesicles of this mosquito

393 species [65] strengthens the case for a proposed receptor role in virus entry into vector  
394 mosquito midguts. Other insect-virus studies have proposed a role for enolase in antiviral  
395 defense [61] and tracheal basal laminal remodeling aiding in virus escape from the gut [66].  
396 If remodeling of the midgut basal lamina via enolase interactions occurs in TSWV-infected  
397 larval thrips, that could be one hypothesis supporting dissemination of TSWV from the larval  
398 midgut into the principal SGs [24].

399 The other TIP known to play a role in energy production is mitochondrial ATP synthase  
400  $\alpha$  subunit. The multi-subunit enzyme mATPase is responsible for generating the majority of  
401 cellular ATP required by eukaryotes to meet their energy needs. As with the other non-  
402 cuticle TIPs, mATPase  $\alpha$  subunit was previously identified to be differentially-abundant (up-  
403 regulated) under TSWV infection [52], as was the case for RSV-infected *L. striatellus* vector  
404 hoppers [62]. Mitochondria have been also been implicated in virus-host biology. For  
405 example, *African swine fever virus* (ASFV; *Asfarviridae: Asfivirus*) has been shown to induce  
406 migration of mitochondria to the periphery of viral factories [67], possibly suggesting that  
407 mitochondria supply energy for viral morphogenetic processes. The finding that two TIPs in  
408 the present study have ontologies in energy production and metabolism suggests that  
409 perturbation or direct interactions with these host proteins may be required for the successful  
410 infection of *F. occidentalis* by TSWV.

411 The discovery of six TIPs is a significant step forward for understanding thrips  
412 interactions with TSWV. The first evidence of TSWV protein-thrips protein interactions was  
413 presented 20 years ago [68] and the proteins described herein are the first thrips protein  
414 documented to interact directly with the major structural proteins (N, G<sub>N</sub>, G<sub>C</sub>). In other  
415 eukaryotes, the six interacting proteins have biological functions that point to their roles in  
416 facilitating the virus infection/replication cycle by acting as a receptor or other essential step  
417 in the virus lifecycle, and/or host-response via a defense mechanism. The virus-host systems

418 that have defined functions for analogous TIPs include plant viruses, arboviruses, and  
419 animal/human viruses, and the findings described here provide a framework for further  
420 exploration and testing of new hypotheses regarding their roles in TSWV-thrips interactions.

## 421 **Materials and methods**

### 422 **Insect rearing and plant and virus maintenance**

423 The *F. occidentalis* colony was established from insects collected on the island of Oahu,  
424 HI, and was maintained on green beans (*Phaseolus vulgaris*) at 22°C (±2°C) under laboratory  
425 conditions as previously described [69]. Thrips were synchronized based on their  
426 developmental stages. For the localization and bimolecular fluorescence complementation  
427 (BiFC) experiments, wildtype and transgenic *Nicotiana benthamiana* expressing CFP:H2B or  
428 RFP:ER [70] were grown in a growth chamber at 25°C with a 14-hour light at 300μM  
429 intensity and 10-hour dark cycle. TSWV (isolate TSWV-MT2) was maintained by both  
430 mechanical inoculation and thrips transmission using *Datura stramonium* and *Emilia*  
431 *sonchifolia*, respectively [21]. To avoid generation of a virus isolate with an insect  
432 transmission deficiency, the virus was mechanically passaged only once. The single-pass  
433 mechanically-inoculated symptomatic *D. stramonium* leaves were used for insect acquisition  
434 of TSWV. Briefly, synchronized *F. occidentalis* first instar larvae (0-17-hour old) were  
435 collected and allowed an acquisition access period (AAP) on *D. stramonium* for 24 hours.  
436 After acquisition, *D. stramonium* leaves were removed and these larvae were maintained on  
437 green beans until they developed to adults. Viruliferous adults were transferred onto clean *E.*  
438 *sonchifolia* for two days. After inoculation, thrips and inoculated *E. sonchifolia* plants were  
439 treated with commercial pest strips for two hours before the plants were moved to the  
440 greenhouse for TSWV symptom development. The thrips-transmitted, TSWV symptomatic  
441 *E. sonchifolia* leaves were only used for mechanical inoculation.

#### 442 **TSWV purification**

443 Mechanically inoculated *D. stramonium* leaves were used for TSWV purification via  
444 differential centrifugation and a sucrose gradient. Symptomatic leaves were homogenized  
445 in extraction buffer (0.033 M KH<sub>2</sub>PO<sub>4</sub>, 0.067 M K<sub>2</sub>HPO<sub>4</sub>, and 0.01 M Na<sub>2</sub>SO<sub>3</sub>) in a 1:3  
446 ratio of leaf tissue to buffer. The homogenate was then filtered through four layers of  
447 cheesecloth, and the flow through was centrifuged at 7,000 rpm for 15 min using the  
448 Sorvall SLA 1500 rotor. To remove the cell debris, the pellet was resuspended in 65 mL  
449 0.01 M Na<sub>2</sub>SO<sub>3</sub> and was centrifuged again at 8,500 rpm for 20 min using the Sorvall SS34  
450 rotor. The supernatant that contained the virions was centrifuged for 33 min at 29,300 rpm  
451 using the 70 Ti rotor, and the pellet was resuspended in 15 mL 0.01 M Na<sub>2</sub>SO<sub>3</sub> followed by  
452 another centrifugation at 9,000 rpm for 15 min using the Sorvall SS34 rotor. The  
453 centrifugation series was repeated one additional time. The pellet was resuspended and  
454 loaded on a sucrose gradient (10 to 40% sucrose), which was centrifuged for 35 min at  
455 21,000 rpm using the SW28 rotor. The virion band was collected and centrifuged for 1  
456 hour at 29,300 rpm using the 70 Ti rotor. The pellet was resuspended in 100 to 200 µl of  
457 0.01 M Na<sub>2</sub>SO<sub>3</sub>. All centrifugation steps were performed at 4°C to prevent virion  
458 degradation. The purified virus was quantified using the bicinchoninic acid (BCA) protein  
459 assay kit (ThermoFisher Scientific, Waltham, MA, USA) following the manufacturer's  
460 instructions.

#### 461 ***F. occidentalis* L1 total protein extraction, quantification and two-dimensional (2-D)** 462 **electrophoresis**

463 Total proteins from age-synchronized healthy larval thrips (0-17-hour old) were  
464 extracted using the trichloroacetic acid-acetone (TCA-A) method [71, 72]. Briefly, whole  
465 insects were ground using liquid nitrogen, and were dissolved in 500 µl TCA-A extraction  
466 buffer (10% of TCA in acetone containing 2% β-mercaptoethanol). This mixture was

467 incubated at -20°C overnight and centrifuged at 5,000 g, 4°C for 30 min. After 3 washes with  
468 ice-cold acetone then air-drying, the pellet was resuspended in 200 µl General-Purpose  
469 Rehydration/Sample buffer (Bio-Rad Laboratories, Hercules, CA, USA). The suspension was  
470 centrifuged at 12,000 g for 5 min and the protein supernatant was quantified using the BCA  
471 protein assay kit (ThermoFisher Scientific) following manufacturer's instructions. For each  
472 gel, 150 µg of total protein extract was applied to an 11-cm IPG strip (pH 3–10) for  
473 isoelectric focusing (IEF). The IEF, IPG strip equilibration and second dimension separation  
474 of proteins were performed under the same conditions described by Badillo-Vargas et al [52].

#### 475 **Overlay assays**

476 To identify thrips proteins that bind to TSWV virions and recombinant glycoprotein G<sub>N</sub>,  
477 we conducted gel overlay assays. For the purified virion overlays, the experiment was  
478 performed four times (biological replications); and for the G<sub>N</sub> overlay, the experiment was  
479 performed twice. For probing the protein-protein interactions, each unstained 2-D gel was  
480 electro-transferred onto Hybond-C Extra nitrocellulose membrane (Amersham Biosciences,  
481 Little Chalfont, UK) overnight at 30 V (4°C) in protein transfer buffer (48 mM Tris, 39 mM  
482 glycine, 20% methanol, and 0.037% SDS). Then, the membrane was incubated with blocking  
483 buffer (PBS, 0.05% Tween 20 and 5% dry milk) for 1h at room temperature on a rocker with  
484 a gentle rotating motion. Three different antigens were used to probe the thrips protein  
485 membranes: purified TSWV virions, recombinant glycoprotein G<sub>N</sub> (*E. coli* expressed), and  
486 virus-free plant extract from a mock virus purification (negative control). An additional  
487 negative control blot (no overlay) treated with antibodies alone was included in each overlay  
488 replicate. For the virus and G<sub>N</sub> treatments, 25 µg/mL and 3.5 µg/mL of purified TSWV  
489 virions and recombinant G<sub>N</sub> glycoprotein, respectively, were incubated with membranes in  
490 blocking buffer at 4°C overnight with gentle rotating motion. Membranes were washed three  
491 times using PBST and were incubated with polyclonal rabbit anti-TSWV G<sub>N</sub> antiserum at



492 1:2,000 dilution in blocking buffer for 2 hours at room temperature [9, 29]. After washing  
493 with PBST, membranes were incubated with HRP-conjugated goat-anti rabbit antiserum at  
494 1:5,000 dilution in blocking buffer for 1 hour at room temperature. The ECL detection  
495 system (Amersham Biosciences) was used for protein visualization following the  
496 manufacturer's instructions. The protein spots that were consistently observed on the  
497 membranes were first compared with those proteins spots that interacted with antibody-only  
498 blots (Fig 1A and Fig 2A) and virus-free plant extract blots, and then they were pinpointed  
499 on the corresponding Coomassie Brilliant Blue G-250-stained 2-D gels for spot picking.

### 500 **Identification of TIPs**

501 Protein spots that were consistently identified in the 2-D gel overlays were selected and  
502 manually picked for analysis. The picked proteins were processed and subjected to ESI mass  
503 spectrometry as previously described [31]. Protein spots (peptides) that had Mascot scores  
504 (Mascot v2.2) with significant matches ( $P \leq 0.05$ ) to translated *de novo*-assembled contigs  
505 (all six frames) derived from mixed stages of *F. occidentalis* ("Fo Seq" 454-Sanger hybrid)  
506 [52] were identified and NCBI Blastx was performed on the contigs to provisionally annotate  
507 ( $E < 10^{-10}$ ) the protein and to predict conserved motifs using the contig as the query and the  
508 NCBI non-redundant protein database as the subject.

509 A second round of TIP candidate selection was conducted for stringency in moving  
510 forward to cloning and confirmation of interactions. A contig sequence was retained if it  
511 contained a complete predicted ORF (*i. e.*, presence of both start and stop codons predicted  
512 with Expasy, Translate Tool, <http://web.expasy.org/translate/>) and had at least 10% coverage  
513 by a matching peptide(s) identified for a spot as predicted by Mascot. *i. e.* removal of proteins  
514 identified by a single peptide with less than 10% coverage to a Fo Seq contig and/or contigs  
515 with incomplete ORFs (lacking predicted stop codon). The translated ORFs were queried  
516 against the NCBI non-redundant protein database (Blastp), and CCTOP software

517 (<http://cctop.enzim.ttk.mta.hu>) [73] and SignalP 4.1 Server  
518 (<http://www.cbs.dtu.dk/services/SignalP/>) [74] were used to predict the presence of  
519 transmembrane domains and signal peptides, respectively. Prosite (<http://prosite.expasy.org/>)  
520 was used to analyze putative post-translational modifications that may have affected  
521 electrophoretic mobility of identical proteins in the overlay assays, i. e., same peptide  
522 sequence or *Fo* Seq contig match identified for more than one protein spot.

523

#### 524 **Classification and phylogenetic analysis of the three confirmed cuticular TIPs**

525 Given the apparent enrichment of putative cuticular proteins (CP) identified in the  
526 overlay assays and the subsequent confirmation of three of those TIPs (CP-V, endoCP-G<sub>N</sub>,  
527 endoCP-V), it was of interest to perform a second layer of protein annotations. The ORFs  
528 (amino acid sequence) of the three confirmed CP TIPs, 19 exemplar insect orthologous  
529 sequences obtained from NCBI GenBank, and a significant collection of structural CP  
530 transcripts previously reported to be differentially-expressed in TSWV-infected larval thrips  
531 of *F. occidentalis* [27] were subjected to two complementary arthropod CP prediction tools.  
532 CutProtFam-Pred (<http://aias.biol.uoa.gr/CutProtFam-Pred/home.php>) [75] was used to  
533 classify each amino acid sequence by CP family – there are 12 described families for  
534 arthropods, each distinguished by conserved sequence motifs shared by members [35] – and  
535 CuticleDB (<http://bioinformatics.biol.uoa.gr/cuticleDB>) [76] was used to distinguish what  
536 was found to be two enriched, chitin-binding CP families in our dataset: CPR-RR1 and CPR-  
537 RR2, i. e., R&R Consensus motif [26]. The sequences flanking the RR1 and RR2 predicted  
538 chitin-binding domains were so divergent between the thrips CPs and across the entire set of  
539 CPs (thrips and other insects) that alignments using full-length ORFs were ambiguous and  
540 uninformative, thus illustrating the utility of the R&R Consensus for inferring evolutionary  
541 history of CP proteins. The flanking sequences were trimmed manually, and the R&R

542 consensus sequences (RR1 and RR2) were aligned with MEGA7 [77] using ClustalW.  
543 Phylogenetic analyses were performed in MEGA7 using the Neighbor-Joining (NJ) method  
544 and the best substitution models determined for the data - Dayhoff matrix-based [78] or Jones  
545 Taylor Thorton (JTT) [79] methods for amino acid substitutions with Gamma distribution -  
546 to model the variation among sites. Bootstrap consensus trees (500 replicates) were generated  
547 by the NJ algorithm with pairwise deletion for handling gaps. The analysis involved 46  
548 sequences and there were 95 amino-acid positions in the final dataset.

#### 549 **Cloning of candidate TIPs and TSWV genes**

550 For generation of full-length clones of TIPs that were used in various protein-protein  
551 assays, total RNA was extracted from L1 thrips (0-17-hour old) using 1 ml Trizol Reagent  
552 (ThermoFisher Scientific), then 200  $\mu$ l chloroform and was precipitated with 500  $\mu$ l  
553 isopropanol. The RNA pellet was dissolved in nuclease-free water, and 1 $\mu$ g total RNA was  
554 used for cDNA synthesis using Verso cDNA Synthesis kit (ThermoFisher Scientific). The  
555 PCR was performed to amplify six identified TIP ORFs using high fidelity polymerase,  
556 FailSafe (Epicentre, Madison, WI, USA). The designed primers used are listed in S3 Table.  
557 Amplicons were cloned into pENTR-D/TOPO (ThermoFisher Scientific).

558 TSWV genes were also cloned to pENTR-D/TOPO, then recombined to different vectors  
559 using Gateway cloning techniques. Coding sequence of TSWV N gene was amplified from  
560 pBS-NC4.5 [80], while coding sequences of different glycoproteins,  $G_N$ ,  $G_{N-S}$ ,  $G_C$ ,  $G_{C-S}$   
561 were amplified from pGF7 [81]. Primers used for PCR were listed in S3 Table.

#### 562 **Gal4-based yeast two-hybrid (Y2H) assay**

563 The Matchmaker Gold Yeast Two-Hybrid System (Takara Bio, Kusatsu, Shiga  
564 Prefecture, Japan) was used for validating interactions between TIPs and TSWV N. TSWV N  
565 and TIP ORFs were cloned from pENTR entry clones to pDEST-GBKT7 (The Arabidopsis

566 Information Resource, TAIR, Accession: 1010229696) and pDEST-GADT7 (TAIR,  
567 Accession: 1010229695), respectively, using Gateway LR Clonase II Enzyme Mix (Thermo  
568 Fisher Scientific). After Sanger sequencing confirmation, every subject plasmid pair,  
569 including one pDEST-GADT7-TIP and pDEST-GBKT7-N were co-transformed into yeast  
570 strain Y2HGold following the manufacturer's instructions. Briefly, yeast (Y2HGold)  
571 competent cells were freshly prepared following the manufacturer's instructions, then each  
572 purified plasmid pair (100ng / plasmid) were added into 100  $\mu$ l yeast competent cells with 50  
573  $\mu$ g denatured Yeastmaker Carrier DNA and 50  $\mu$ l PEG/LiAc. The mixture was incubated at  
574 30°C for 30 min with mixing every 10 min. Twenty microliters of dimethyl sulfoxide  
575 (DMSO) was then added into each reaction, and the cells were incubated at 42°C for 20 min  
576 with mixing every 5 min. After centrifugation at 14,000 rpm for 15 sec, the supernatant was  
577 removed, and the pellet was resuspended in 1 ml YPDA media. The re-suspended cells were  
578 incubated at 30°C for 90 min with shaking at 200 rpm. Cells were centrifuged at 14,000 rpm  
579 for 15 sec, and resuspended in 500  $\mu$ l sterile 0.9% (w/v) NaCl, which was then spread and  
580 cultured on both SD-Leu/-Trp double dropout (DDO) and SD-Ade/-His/-Leu/-Trp  
581 quadruple dropout (QDO) media. The positive and negative control plasmid pairs used were  
582 pGADT7-T and pGBKT7-53, and pGADT7-T and pGBKT7-Lam, respectively. The entire  
583 experiment was performed three times.

#### 584 **Split-ubiquitin membrane-based yeast two-hybrid (MbY2H)**

585 The MbY2H system was used to validate both TSWV  $G_N$ -TIPs and TSWV N-TIPs  
586 interactions identified in the gel overlays. The MbY2H system enables validation of  
587 interactions for soluble and integral membrane proteins. TSWV  $G_N$  and N coding sequences  
588 were cloned into the MbYTH vector pBT3-SUC, and six TIP ORFs were cloned to vector  
589 pPR3N using SfiI (Dualsystems Biotech, Schlieren, Switzerland). To identify the region of  
590 endoCP- $G_N$  that binds to TSWV  $G_N$  using MbY2H, the amino acid sequence of endoCP- $G_N$

591 (284aa) was used to search against the NCBI non-redundant protein database using Blastp.  
592 The conserved CHB4 domain was located at C-termini of endoCP-G<sub>N</sub> (amino acid 190-246).  
593 Therefore, the possible interacting domains, the non-conserved region of endoCP-G<sub>N</sub> (1-  
594 189aa) and the conserved CHB4 domain (190-274aa), were individually cloned into pPR3N  
595 using the SfiI restriction site. Based on the Blastp results, the homologous sequences from  
596 other insect species encompassed some additional amino acids upstream of the CHB4  
597 domain; therefore, we made an alternative construct that included the conserved CBH4  
598 domain starting from amino acid 177. Hence, the coding sequence of 1-176aa and 177-284aa  
599 of endoCP-G<sub>N</sub> were also cloned to pPR3N using SfiI. Primers used for cloning are listed in  
600 S4 Table.

601 The MbY2H assays were performed using the manufacturer's instructions with  
602 recombinant plasmids that were confirmed by Sanger sequencing. Yeast (NYM51)  
603 competent cells were freshly prepared and recombinant bait plasmids, pBT3-SUC-G<sub>N</sub> and  
604 pBT3-SUC-N were transformed into yeast strain NYM51. Briefly, 1.5µg bait plasmids were  
605 added into 100 µl yeast competent cells with 50 µg denatured Yeastmaker Carrier DNA and  
606 500 µl PEG/LiAc. The mixture was incubated at 30°C for 30 min with mixing every 10 min.  
607 Twenty µl DMSO was then added into each reaction, and the cells were incubated at 42°C  
608 for 20 min with mixing every 5 min. After centrifugation at 14,000 rpm for 15 sec, the  
609 supernatant was removed, and the pellet was resuspended in 1 ml YPDA media. The re-  
610 suspended cells were incubated at 30°C for 90 min with shaking at 200 rpm. Then, cells were  
611 centrifuged at 14,000 rpm for 15 sec, and resuspended in 500 µl sterile 0.9% (w/v) NaCl,  
612 which was then spread and cultured on SD/-Trp dropout media at 30°C until the colonies  
613 showed. Several colonies from the same SD/-Trp plate were cultured for preparing yeast  
614 competent cells. Then each individual recombinant plasmid, pPR3N-TIP or pPR3N-partial  
615 endoCP-G<sub>N</sub> (1.5 µg/transformation reaction), was transformed into yeast competent cells

616 expressing fused Nub-G<sub>N</sub> or Nub-N using the same transformation method. The  
617 transformants were cultured on both SD/–Leu/–Trp double dropout (DDO) and SD/–Ade/–  
618 His/–Leu/–Trp quadruple dropout (QDO) media. The positive controls included  
619 transformation of pOst1-NubI into NYM51 that already expressed fused Nub-G<sub>N</sub> or Nub-N,  
620 as well as co-transformation of pTSU2-APP and pNubG-Fe65 into NYM51. Negative control  
621 was transformation of pPR3N (empty vector) into NYM51 that already expressed fused Nub-  
622 G<sub>N</sub> or Nub-N. All transformants were spread and cultured on both DDO and QDO media at  
623 30°C incubator. The entire experiment was performed three times.

#### 624 **Yeast β-galactosidase assay**

625 Expression of the reporter gene *LacZ* and the activity of expressed β-galactosidase in  
626 yeast cells derived from MbY2H was determined by β-galactosidase assay kit following the  
627 manufacturer's protocol (ThermoFisher Scientific). Each yeast colony was transferred and  
628 mixed in 250 μl Y-PER by vortex, this initial OD<sub>660</sub> value was tested. After adding 250 μl  
629 2X β-galactosidase assay buffer to the mixed solution, the reaction was incubated at 37° C  
630 until the color change of solution was observed. Two hundred μl of β-galactosidase assay  
631 stop solution was added immediately into color change solution, and the reaction time was  
632 recorded. Cell debris was removed by centrifugation at 13,000 g for 30 seconds. Supernatant  
633 was transferred into cuvettes to measure OD<sub>420</sub> using the blank including 250 μl of Y-PER  
634 reagent, 250 μl β-galactosidase assay buffer and 200 μl β-galactosidase assay stop solution.  
635 The β-galactosidase activity was calculated using the equation from the manufacturer's  
636 protocol.

#### 637 **GFP fusion protein expression and bimolecular fluorescence complementation (BiFC)** 638 **in *Nicotiana benthamiana***

639 To visualize protein expression and localization in plants, TSWV structural proteins

640 (ORFs corresponding to N, G<sub>N</sub>, G<sub>N</sub>S, G<sub>C</sub> and G<sub>C</sub>S) and TIP ORFs (mATPase, CP-V,  
641 endoCP-V, endoCP-G<sub>N</sub>, cyclophilin and enolase) were expressed as fusions to  
642 autofluorescent proteins. They were moved from their entry clones into pSITE-2NB (GFP  
643 fused to the carboxy terminus of protein of interest) or pSITE-2CA (GFP fused to the amino  
644 terminus of the protein of interest) using Gateway LR Clonase [82]. After validation of  
645 plasmids by Sanger sequencing, they were transformed into *Agrobacterium tumefaciens*  
646 strain LBA 4404. The transformed LBA 4404 was grown for two days at 28°C and re-  
647 suspended in 0.1 M MES and 0.1 M MgCl<sub>2</sub> to an OD<sub>600</sub> between 0.6 to 1. After the addition  
648 of 0.1 M acetosyringone, the suspension was incubated at room temperature for two hours,  
649 and then infiltrated in transgenic *N. benthamiana* expressing an endoplasmic reticulum (ER)  
650 marker fused to red fluorescent protein (m5RFP-HDEL). Two days after infiltration, leaf  
651 tissue was mounted in water on a microscope slide for detection of GFP by confocal  
652 microscopy. Plants were infiltrated a minimum of two separate occasions with at least two  
653 leaves per plant in two plants. A minimum of fifty cells were visualized in each plant to  
654 confirm the localization patterns of the proteins *in planta*.

655 The preliminary localization results and sequence analysis informed the fusion construct  
656 design for BiFC assays. Signal peptides were identified in the amino terminus of G<sub>N</sub>, G<sub>C</sub>, and  
657 three TIPs (all cuticle proteins) and the signal peptide is required for proper localization and  
658 function of fusion-GFP/YFP proteins in *N. benthamiana* for BiFC assays. Based on the  
659 expression and localization results of GFP fusion proteins, we fused half YFPs (either amino  
660 or carboxy half of YFP) to the carboxy termini of all proteins with N-terminal signal peptides  
661 using BiFC plasmids pSITE-NEN and pSITE-CEN. For TSWV-N - which does not contain a  
662 signal peptide and did not show significant differences in localization - the interactions with  
663 fusions at both the N- and C- termini of this protein in vectors pSITE-NEN, pSITE-CEN,  
664 pSITE-NEC and pSITE-CEC were tested. All ORFS were transferred between plasmids

665 using Gateway LR Clonase II Enzyme Mix (ThermoFisher Scientific) [70]. All clones were  
666 transformed into *A. tumefaciens* strain LBA 4404 and confirmed by Sanger sequencing.

667 Each combination of TIPs and TSWV G<sub>N</sub>, G<sub>C</sub> and N was infiltrated into *N. benthamiana*  
668 expressing CFP fused to a nuclear marker, histone 2B, (CFP-H2B), and a minimum of three  
669 independent experiments with two plants and two leaves per plant for each combination of  
670 proteins. For the analysis of interactions, a minimum of 50 cells with similar localization  
671 patterns was required to confirm the interaction and a minimum of two separate images were  
672 captured on each occasion for documentation. GST fusions to YFP halves were utilized as a  
673 non-binding control for each of the TIPs. To be recorded as a positive interaction,  
674 fluorescence of the interacting TSWV protein-TIPs was required to be above that observed  
675 between each TIP and GST.

#### 676 **Polyclonal antisera against TIPs**

677 To generate antibodies to the TIPs, the protein sequence was analyzed for multiple  
678 features such as antigenicity and hydrophobicity using GenScript protein analysis methods  
679 (insert website that contains these bioinformatic tools). For each TIP, a 14 amino acid peptide  
680 was selected based on these predictions and by sequence alignments to other predicted  
681 protein sequences in GenBank. Due to the conserved CHB4 domain in endoCP-G<sub>N</sub>, endoCP-  
682 V, and CP-V, the polyclonal antibodies against these three TIPs were generated using their  
683 non-conserved region. The peptides were synthesized (GenScript, Piscataway, NJ, United  
684 States), and all antisera were produced using mice. The peptide sequences for each TIP that  
685 were used for the antibody generation were: cyclophilin, LESFGSHDGKTSKK; enolase,  
686 ELRDNDKSQYHGKS; CP-V, TDSGQYRKEKRLED; endoCP-G<sub>N</sub>, STKVNPQSFSRSSV;  
687 endoCP-V, VNPDGSFQYSYQTG; and mATPase, GHLDKLDPAKITDF.



## 688 **Immunolabeling thrips guts, Malpighian tubules, and salivary glands**

689 To determine the location of TIPs expression in the most efficient thrips stage that  
690 acquires TSWV (L1), we used the TIPs antibodies in immunolocalization experiments.  
691 Newly emerged larvae (0-17-hour old) were collected from green beans and were then fed on  
692 7% sucrose solution for 3 hours to clean their guts from plant tissues. The larvae were  
693 dissected on glass slides using cold phosphate saline (PBS) buffer and Teflon coated razor  
694 blades. The dissected thrips were transferred into 2-cm-diam., flat-bottomed watch glasses  
695 (U.S. Bureau of Plant Industry, BPI dishes) and the tissues were fixed for 2 hours using 4%  
696 paraformaldehyde solution in 50 mM sodium phosphate buffer (pH 7.0). The tissues were  
697 washed using PBS buffer after fixation and were incubated with PBS buffer including 1%  
698 Triton X-100 overnight. The overnight permeabilized tissues were then washed before  
699 incubation in blocking buffer which included PBS, 0.1% Triton X-100 and 10% normal goat  
700 serum (NGS) for 1 hour. After removing the blocking buffer, the dissected thrips were  
701 incubated with primary antibody, 100 µg/ml mice-generated antisera against each individual  
702 TIP (GenScript) that was diluted in antibody buffer (0.1% Triton X-100 and 1% NGS). After  
703 wash, 10 µg/ml secondary antibody, goat anti-mouse antibody conjugated with Alexa Fluor  
704 488 (ThermoFisher Scientific) was used to incubate the dissected thrips organs. Incubation  
705 was performed at room temperature for 2.5 hours, and 1x PBS buffer was used for washing  
706 and every wash step included three times, the secondary antibody incubation was protected  
707 from light by covering the samples with aluminum foil. After removing antibodies and wash,  
708 dissected thrips were incubated for 2 hours with Phalloidin-Alexa 594 conjugated  
709 (ThermoFisher Scientific) in 1x PBS with a concentration of 4 units/ml for actin staining.  
710 After wash, the tissues were transferred onto glass slides, and SlowFade™ Diamond  
711 Antifade Mountant with DAPI (ThermoFisher Scientific) was added onto tissues to stain  
712 nuclei. The cover slips were slowly placed on tissues to avoid bubbles, then sealed with

713 transparent nail polish at edges. After blocking, the dissected thrips tissues that were only  
714 incubated with antibody buffer (without adding primary antibody) and the tissues incubated  
715 with each pre-immune mouse antiserum (GenScript) were used as controls respectively. All  
716 the experiments were performed twice.

717 Inherent with very small tissues (< 1 mm body size), there were common losses or  
718 damaged tissues during the dissection process and staining procedures; so only the number of  
719 visibly intact tissue that made it through to microscopic observation were used for data  
720 collection and this number varied for each type of tissue (S5 Table). The auto- fluorescent  
721 background from thrips tissues incubated with each pre-immune antiserum was slightly  
722 higher than the thrips tissues incubated with PBS buffer (no antibody control) (data not  
723 shown), therefore, the confocal laser settings (power and percent/gain) were adjusted to  
724 remove any background fluorescence observed for these treatments.

### 725 **Co-localization of TSWV and TIPs in thrips larvae**

726 The two proteins that interacted with  $G_N$  in the MbY2H assay, endoCP- $G_N$  and  
727 cyclophilin, were used in colocalization experiments to determine if they are expressed in the  
728 same midgut cells during virus infection. Synchronized first instar thrips larvae (0-17-hour  
729 old) were collected from green beans and were separated into two groups with similar  
730 number in each group. Each group of thrips were fed on either healthy (control) or TSWV-  
731 symptomatic *E. sonchifolia* leaves (mechanically inoculated) for three acquisition access  
732 periods (AAPs) - 24, 48 and 72 hours of exposure - and maintained at 25°C in an incubator.  
733 After each AAP, these larvae were transferred to 7% sucrose for 3 hours to remove the plant  
734 tissue from their guts. The thrips were dissected, and tissues were fixed and permeabilized  
735 using the same method mentioned above. The overnight permeabilized tissues were  
736 sequentially incubated with two primary antibodies at 50 µg/ml, which were rabbit generated  
737 anti- $G_N$  (TSWV glycoprotein) and mouse-generated anti-endoCP- $G_N$ /anti-cyclophilin. Then,

738 two secondary antibodies were sequentially used at 10  $\mu\text{g}/\text{ml}$ , which were chicken anti-rabbit  
739 Alexa Fluor 488, and goat anti-mouse Alexa Fluor 594 (ThermoFisher Scientific). Three  
740 wash were performed (1x PBS) between antibodies, all incubations were performed at room  
741 temperature for 2.5 hours or at 4°C overnight, and the secondary antibody incubation was  
742 protected from light by covering the samples with aluminum foil. After removal of secondary  
743 antibodies, thrips tissues were washed and incubated with Alexa Fluor 647 Phalloidin for  
744 actin staining using the same concentration and conditions mentioned above. After three  
745 washes with PBS, the tissues were transferred onto glass slides. Nuclei were stained with  
746 DAPI and insect tissues were mounted for imaging as described above. The control thrips  
747 larvae that fed on healthy *E. sonchifolia* leaves were collected at each time point and were  
748 dissected and treated the same as those fed on TSWV-infected leaves. The entire experiment  
749 was performed twice.

#### 750 **Laser scanning confocal microscopy**

751 Confocal microscopy was used to detect the GFP produced from expressed TIP-GFP fusions,  
752 YFP from interacting TIPs and TSWV structural proteins, localization of TIPs in thrips  
753 larvae as well as co-localized TIPs and TSWV. All images were acquired on a Zeiss LSM  
754 780 laser scanning confocal microscope using the C-Apochromat 40x/1.2 W Korr M27 and  
755 Plan-Apochromat 20x/0.8 M27 objectives. Image acquisition was conducted on Zen 2 black  
756 edition v. 10.0.0 at 1024 x 1024 pixels with a scan rate of 1.58 $\mu\text{s}$  per pixel with pixel average  
757 of 4 bit and 16 bit depth. The laser power percent/gain settings for detection of nuclei and  
758 actin as well as bright field were adjusted accordingly. Laser power percent/gain settings for  
759 detection of TIPs and TSWV were equal or smaller than their controls. Z-stacks were taken  
760 for localization of TIPs in thrips, and co-localization of TIPs and TSWV respectively. Eight  
761 (TIPs localization) and ten (co-localization) Z-stack slides were processed using Maximum

762 intensity projection using Zen 2 black. Zen 2 blue edition lite 2010 v. 2.0.0.0 was used for  
763 image conversion to jpeg format.

764

765 **Acknowledgements:** This project was supported by the following grants: USDA-NIFA  
766 2007-35319-18326 and 2016-67013-27492, USDA-FNRI 6034-22000-039-06S, and  
767 National Science Foundation CAREER Grant IOS-0953786. Ismael Badillo Vargas was  
768 partially supported by the National Institute of Food and Agriculture Predoctoral Fellowship,  
769 grant KS602489. We thank Thomas L. German and Ranjit Dasgupta for providing purified  
770 G<sub>N</sub> for protein overlays.

## 771 **References**

- 772 1. Gubler DJ. Resurgent vector-borne diseases as a global health problem. *Emerg Infect*  
773 *Dis.* 1998;4: 442-50. doi: 10.3201/eid0403.980326. PubMed PMID: 9716967; PubMed  
774 Central PMCID: PMC2640300.
- 775 2. Gubler DJ. The global emergence/resurgence of arboviral diseases as public health  
776 problems. *Arch Med Res.* 2002;33: 330-42. doi:10.1016/S0188-4409(02)00378-8. PubMed  
777 PMID: 12234522.
- 778 3. Elliott RM. Emerging viruses: the Bunyaviridae. *Mol Med.* 1997;3: 572-7. PubMed  
779 PMID: 9323708; PubMed Central PMCID: PMC2230091.
- 780 4. Horne KM, Vanlandingham DL. Bunyavirus-vector interactions. *Viruses.* 2014;6:  
781 4373-97. doi: 10.3390/v6114373. PubMed PMID: 25402172; PubMed Central PMCID:  
782 PMC4246228.
- 783 5. Beaty BJ, Bishop DH. Bunyavirus-vector interactions. *Virus Res.* 1988;10: 289-301.  
784 doi: 10.1016/0168-1702(88)90071-8. PubMed PMID: 3046165.
- 785 6. Rotenberg D, Jacobson AL, Schneweis DJ, Whitfield AE. Thrips transmission of

- 786 tospoviruses. *Curr Opin Virol.* 2015;15: 80-9. doi: 10.1016/j.coviro.2015.08.003. PubMed  
787 PMID: 26340723.
- 788 7. Whitfield AE, Ullman DE, German TL. Tospovirus-thrips interactions. *Annu Rev*  
789 *Phytopathol.* 2005;43: 459-89. doi: 10.1146/annurev.phyto.43.040204.140017. PubMed  
790 PMID: 16078892.
- 791 8. Parrella G, Gognalons P, Gebre-Selassie K, Vovlas C, Marchoux G. An update of the  
792 host range of Tomato spotted wilt virus. *J Plant Pathol.* 2003;85: 227-64.
- 793 9. Montero-Astua M, Rotenberg D, Leach-Kieffaber A, Schneewis BA, Park S, Park JK,  
794 et al. Disruption of vector transmission by a plant-expressed viral glycoprotein. *Mol Plant*  
795 *Microbe Interact.* 2014;27: 296-304. doi: 10.1094/MPMI-09-13-0287-FI. PubMed PMID:  
796 24405031.
- 797 10. Whitfield AE, Kumar NK, Rotenberg D, Ullman DE, Wyman EA, Zietlow C, et al. A  
798 soluble form of the *tomato spotted wilt virus* (TSWV) glycoprotein GN (GN-S) inhibits  
799 transmission of TSWV by *Frankliniella occidentalis*. *Phytopathology.* 2008;98(1):45-50.  
800 Epub 2008/10/24. doi: 10.1094/PHYTO-98-1-0045. PubMed PMID: 18943237.
- 801 11. Whitfield AE, Ullman DE, German TL. Expression and characterization of a soluble  
802 form of tomato spotted wilt virus glycoprotein G<sub>N</sub>. *J Virol.* 2004;78: 13197-206. doi:  
803 10.1128/JVI.78.23.13197-13206.2004. PubMed PMID: 15542672; PubMed Central PMCID:  
804 PMC524983.
- 805 12. de Haan P, Kormelink R, de Oliveira Resende R, van Poelwijk F, Peters D, Goldbach  
806 R. Tomato spotted wilt virus L RNA encodes a putative RNA polymerase. *J Gen Virol.*  
807 1991;72: 2207-16. doi: 10.1099/0022-1317-72-9-2207. PubMed PMID: 1895058.
- 808 13. Kormelink R, de Haan P, Meurs C, Peters D, Goldbach R. The nucleotide sequence of  
809 the M RNA segment of tomato spotted wilt virus, a bunyavirus with two ambisense RNA  
810 segments. *J Gen Virol.* 1992;73: 2795-804. doi: 10.1099/0022-1317-73-11-2795. PubMed

811 PMID: 1431808.

812 14. Lewandowski DJ, Adkins S. The tubule-forming NSm protein from Tomato spotted  
813 wilt virus complements cell-to-cell and long-distance movement of Tobacco mosaic virus  
814 hybrids. *Virology*. 2005;342: 26-37. doi: 10.1016/j.virol.2005.06.050. PubMed PMID:  
815 16112159.

816 15. Soellick T, Uhrig JF, Bucher GL, Kellmann JW, Schreier PH. The movement protein  
817 NSm of tomato spotted wilt tospovirus (TSWV): RNA binding, interaction with the TSWV N  
818 protein, and identification of interacting plant proteins. *Proc Natl Acad Sci USA*. 2000;97:  
819 2373-8. doi: 10.1073/pnas.030548397. PubMed PMID: 10688879; PubMed Central PMCID:  
820 PMC15808.

821 16. Storms MM, Kormelink R, Peters D, Van Lent JW, Goldbach RW. The nonstructural  
822 NSm protein of tomato spotted wilt virus induces tubular structures in plant and insect cells.  
823 *Virology*. 1995;214: 485-93. doi: 10.1006/viro.1995.0059. PubMed PMID: 8553550.

824 17. de Haan P, Wagemakers L, Peters D, Goldbach R. The S RNA segment of tomato  
825 spotted wilt virus has an ambisense character. *J Gen Virol*. 1990;71: 1001-7.  
826 doi:10.1099/0022-1317-71-5-1001. PubMed PMID: 1693160.

827 18. de Ronde D, Pasquier A, Ying S, Butterbach P, Lohuis D, Kormelink R. Analysis of  
828 Tomato spotted wilt virus NSs protein indicates the importance of the N-terminal domain for  
829 avirulence and RNA silencing suppression. *Mol Plant Pathol*. 2014;15: 185-95. doi:  
830 10.1111/mpp.12082. PubMed PMID: 24103150.

831 19. Margaria P, Bosco L, Vallino M, Ciuffo M, Mautino GC, Tavella L, et al. The NSs  
832 protein of tomato spotted wilt virus is required for persistent infection and transmission by  
833 *Frankliniella occidentalis*. *J Virol*. 2014;88: 5788-802. doi: 10.1128/JVI.00079-14. PubMed  
834 PMID: 24623427; PubMed Central PMCID: PMC4019118.

- 835 20. Takeda A, Sugiyama K, Nagano H, Mori M, Kaido M, Mise K, et al. Identification of  
836 a novel RNA silencing suppressor, NSs protein of Tomato spotted wilt virus. *FEBS Lett.*  
837 2002;532: 75-9. doi:10.1016/S0014-5793(02)03632-3. PubMed PMID: 12459466.
- 838 21. Ullman DE, German TL, Sherwood JL, Westcot DM, Cantone FA. Tospovirus  
839 replication in insect vector cells: immunocytochemical evidence that the nonstructural protein  
840 encoded by the S RNA of tomato spotted wilt tospovirus is present in thrips vector cells.  
841 *Phytopathology.* 1993;83: 456-63. doi:10.1094/Phyto-83-456.
- 842 22. Wijkamp I, van Lent J, Kormelink R, Goldbach R, Peters D. Multiplication of tomato  
843 spotted wilt virus in its insect vector, *Frankliniella occidentalis*. *J Gen Virol.* 1993;74: 341-9.  
844 doi: 10.1099/0022-1317-74-3-341. PubMed PMID: 8445364.
- 845 23. Nagata T, Inoue-Nagata AK, Smid HM, Goldbach R, Peters D. Tissue tropism related  
846 to vector competence of *Frankliniella occidentalis* for tomato spotted wilt tospovirus. *J Gen*  
847 *Virol.* 1999;80: 507-15. doi: 10.1099/0022-1317-80-2-507. PubMed PMID: 10073714.
- 848 24. Ullman DE, Cho JJ, Mau RFL, Westcot DM, Custer DM. A midgut barrier to tomato  
849 spotted wilt virus acquisition by adult western flower thrips. *Phytopathology.* 1992;82: 1333-  
850 42. doi:10.1094/Phyto-82-1333.
- 851 25. Sin SH, McNulty BC, Kennedy GG, Moyer JW. Viral genetic determinants for thrips  
852 transmission of Tomato spotted wilt virus. *Proc Natl Acad Sci USA.* 2005;102: 5168-73. doi:  
853 10.1073/pnas.0407354102. PubMed PMID: 15753307; PubMed Central PMCID:  
854 PMC552972.
- 855 26. Rebers JE, Riddiford LM. Structure and expression of a *Manduca sexta* larval cuticle  
856 gene homologous to *Drosophila* cuticle genes. *J Mol Biol.* 1988;203: 411-23.  
857 doi:10.1016/0022-2836(88)90009-5. PubMed PMID: 2462055.
- 858 27. Schneewis DJ, Whitfield AE, Rotenberg D. Thrips developmental stage-specific  
859 transcriptome response to tomato spotted wilt virus during the virus infection cycle in

- 860 *Frankliniella occidentalis*, the primary vector. *Virology*. 2017;500: 226-37. doi:  
861 10.1016/j.virol.2016.10.009. PubMed PMID: 27835811.
- 862 28. Liu W, Gray S, Huo Y, Li L, Wei T, Wang X. Proteomic analysis of interaction  
863 between a plant virus and its vector insect reveals new functions of hemipteran cuticular  
864 protein. *Mol Cell Proteomics*. 2015;14: 2229-42. doi: 10.1074/mcp.M114.046763. PubMed  
865 PMID: 26091699; PubMed Central PMCID: PMC4528249.
- 866 29. Montero-Astua M, Ullman DE, Whitfield AE. Salivary gland morphology, tissue  
867 tropism and the progression of tospovirus infection in *Frankliniella occidentalis*. *Virology*.  
868 2016;493: 39-51. doi: 10.1016/j.virol.2016.03.003. PubMed PMID: 26999025.
- 869 30. Elliott RM, Schmaljohn CS. Bunyaviridae. In: Knipe DM, Howley PM, editors.  
870 *Fields Virology*. Philadelphia, PA: Lippincott Williams & Wilkins; 2013.
- 871 31. Wang H, Alminait A, Vaheri A, Plyusnin A. Interaction between hantaviral  
872 nucleocapsid protein and the cytoplasmic tail of surface glycoprotein Gn. *Virus Res*.  
873 2010;151: 205-12. doi: 10.1016/j.virusres.2010.05.008. PubMed PMID: 20566401.
- 874 32. Ribeiro D, Borst JW, Goldbach R, Kormelink R. Tomato spotted wilt virus  
875 nucleocapsid protein interacts with both viral glycoproteins Gn and Gc in planta. *Virology*.  
876 2009;383: 121-30. doi: 10.1016/j.virol.2008.09.028. PubMed PMID: 18973913.
- 877 33. Richmond KE, Chenault K, Sherwood JL, German TL. Characterization of the  
878 nucleic acid binding properties of tomato spotted wilt virus nucleocapsid protein. *Virology*.  
879 1998;248: 6-11. doi: 10.1006/viro.1998.9223. PubMed PMID: 9705250.
- 880 34. Andersen SO, Hojrup P, Roepstorff P. Insect cuticular proteins. *Insect Biochem Mol*  
881 *Biol*. 1995;25: 153-76. PubMed PMID: 7711748.
- 882 35. Willis JH. Structural cuticular proteins from arthropods: annotation, nomenclature,  
883 and sequence characteristics in the genomics era. *Insect Biochem Mol Biol*. 2010;40: 189-  
884 204. doi: 10.1016/j.ibmb.2010.02.001. PubMed PMID: 20171281; PubMed Central PMCID:



- 885 PMCPMC2872936.
- 886 36. Chapman RF, Simpson SJ, Douglas AE. The Insects: Structure and Function. 5th ed.  
887 Cambridge: Cambridge University Press; 2013.
- 888 37. Maddrell SHP, Gardiner BOC. The permeability of the cuticular lining of the insect  
889 alimentary canal. *J Exp Biol.* 1980;85: 227-37.
- 890 38. Ullman DE, Westcot DM, Hunter WB, Mau RFL. Internal anatomy and morphology  
891 of *Frankliniella occidentalis* (Pergande) (Thysanoptera: Thripidae) with special reference to  
892 interactions between thrips and tomato spotted wilt virus. *Int J Insect Morphol.* 1989;18: 289-  
893 310. doi: 10.1016/0020-7322(89)90011-1.
- 894 39. Zhu KY, Merzendorfer H, Zhang W, Zhang J, Muthukrishnan S. Biosynthesis,  
895 Turnover, and Functions of Chitin in Insects. *Annu Rev Entomol.* 2016;61: 177-96. doi:  
896 10.1146/annurev-ento-010715-023933. PubMed PMID: 26982439.
- 897 40. Cristofolletti PT, Ribeiro AF, Deraison C, Rahbe Y, Terra WR. Midgut adaptation and  
898 digestive enzyme distribution in a phloem feeding insect, the pea aphid *Acyrtosiphon pisum*.  
899 *J Insect Physiol.* 2003;49: 11-24. doi: 10.1016/S0022-1910(02)00222-6. PubMed PMID:  
900 12770012.
- 901 41. Silva CP, Silva JR, Vasconcelos FF, Petretski MD, Damatta RA, Ribeiro AF, et al.  
902 Occurrence of midgut perimicrovillar membranes in paraneopteran insect orders with  
903 comments on their function and evolutionary significance. *Arthropod Struct Dev.* 2004;33:  
904 139-48. doi: 10.1016/j.asd.2003.12.002. PubMed PMID: 18089029.
- 905 42. Albuquerque-Cunha JM, Gonzalez MS, Garcia ES, Mello CB, Azambuja P, Almeida  
906 JC, et al. Cytochemical characterization of microvillar and perimicrovillar membranes in the  
907 posterior midgut epithelium of *Rhodnius prolixus*. *Arthropod Struct Dev.* 2009;38: 31-44.  
908 doi: 10.1016/j.asd.2008.06.001. PubMed PMID: 18602023.
- 909 43. Terra WR, Costa RH, Ferreira C. Plasma membranes from insect midgut cells. An

- 910 Acad Bras Cienc. 2006;78: 255-69. doi: /S0001-37652006000200007. PubMed PMID:  
911 16710565.
- 912 44. Alvarenga ES, Mansur JF, Justi SA, Figueira-Mansur J, Dos Santos VM, Lopez SG,  
913 et al. Chitin is a component of the *Rhodnius prolixus* midgut. Insect Biochem Mol Biol.  
914 2016;69: 61-70. doi: 10.1016/j.ibmb.2015.04.003. PubMed PMID: 25910679.
- 915 45. Wang H, Wu K, Liu Y, Wu Y, Wang X. Integrative proteomics to understand the  
916 transmission mechanism of *Barley yellow dwarf virus-GPV* by its insect vector  
917 *Rhopalosiphum padi*. Sci Rep. 2015;5: 10971. doi: 10.1038/srep10971. PubMed PMID:  
918 26161807; PubMed Central PMCID: PMC4498328.
- 919 46. Kumari S, Roy S, Singh P, Singla-Pareek SL, Pareek A. Cyclophilins: proteins in  
920 search of function. Plant Signal Behav. 2013;8: e22734. doi: 10.4161/psb.22734. PubMed  
921 PMID: 23123451; PubMed Central PMCID: PMC3745578.
- 922 47. von Hahn T, Ciesek S. Cyclophilin polymorphism and virus infection. Curr Opin  
923 Virol. 2015;14: 47-9. doi: 10.1016/j.coviro.2015.07.012. PubMed PMID: 26281011.
- 924 48. Liu H, Xue Q, Cao W, Yang F, Ma L, Liu W, et al. Foot-and-mouth disease virus  
925 nonstructural protein 2B interacts with cyclophilin A, modulating virus replication. FASEB J.  
926 2018; 15: fj201701351. doi: 10.1096/fj.201701351. PubMed PMID: 29906248.
- 927 49. Kovalev N, Nagy PD. Cyclophilin A binds to the viral RNA and replication proteins,  
928 resulting in inhibition of tombusviral replicase assembly. J Virol. 2013;87: 13330-42. doi:  
929 10.1128/JVI.02101-13. PubMed PMID: 24089553; PubMed Central PMCID: PMC3838255.
- 930 50. Tamborindeguy C, Bereman MS, DeBlasio S, Igwe D, Smith DM, White F, et al.  
931 Genomic and proteomic analysis of *Schizaphis graminum* reveals cyclophilin proteins are  
932 involved in the transmission of *cereal yellow dwarf virus*. Plos One. 2013;8: e71620. doi:  
933 10.1371/journal.pone.0071620. PubMed PMID: 23951206; PubMed Central PMCID:  
934 PMC3739738.

- 935 51. Yang X, Thannhauser TW, Burrows M, Cox-Foster D, Gildow FE, Gray SM.  
936 Coupling genetics and proteomics to identify aphid proteins associated with vector-specific  
937 transmission of polerovirus (luteoviridae). *J Virol.* 2008;82: 291-9. doi: 10.1128/JVI.01736-  
938 07. PubMed PMID: 17959668; PubMed Central PMCID: PMC2224398.
- 939 52. Badillo-Vargas IE, Rotenberg D, Schneweis DJ, Hiromasa Y, Tomich JM, Whitfield  
940 AE. Proteomic analysis of *Frankliniella occidentalis* and differentially expressed proteins in  
941 response to *tomato spotted wilt virus* infection. *J Virol.* 2012;86: 8793-809. doi:  
942 10.1128/JVI.00285-12. PubMed PMID: 22696645; PubMed Central PMCID: PMC3421711.
- 943 53. An P, Wang LH, Hutcheson-Dilks H, Nelson G, Donfield S, Goedert JJ, et al.  
944 Regulatory polymorphisms in the cyclophilin A gene, PPIA, accelerate progression to AIDS.  
945 *PLoS Pathog.* 2007;3: e88. doi: 10.1371/journal.ppat.0030088. PubMed PMID: 17590083;  
946 PubMed Central PMCID: PMCPMC1894826.
- 947 54. Bleiber G, May M, Martinez R, Meylan P, Ott J, Beckmann JS, et al. Use of a  
948 combined ex vivo/in vivo population approach for screening of human genes involved in the  
949 human immunodeficiency virus type 1 life cycle for variants influencing disease progression.  
950 *J Virol.* 2005;79: 12674-80. doi: 10.1128/JVI.79.20.12674-12680.2005. PubMed PMID:  
951 16188970. PubMed Central PMCID: PMC1235818.
- 952 55. Chatterji U, Bobardt M, Selvarajah S, Yang F, Tang H, Sakamoto N, et al. The  
953 isomerase active site of cyclophilin A is critical for hepatitis C virus replication. *J Biol Chem.*  
954 2009;284: 16998-7005. doi: 10.1074/jbc.M109.007625. PubMed PMID: 19380579. PubMed  
955 Central PMCID: PMC2719337.
- 956 56. Kaul A, Stauffer S, Berger C, Pertel T, Schmitt J, Kallis S, et al. Essential role of  
957 cyclophilin A for hepatitis C virus replication and virus production and possible link to  
958 polyprotein cleavage kinetics. *PLoS Pathog.* 2009;5: e1000546. doi:  
959 10.1371/journal.ppat.1000546. PubMed PMID: 19680534; PubMed Central PMCID:

- 960 PMCPMC2718831.
- 961 57. Rits MAN, van Dort KA, Kootstra NA. Polymorphisms in the regulatory region of the  
962 Cyclophilin A gene influence the susceptibility for HIV-1 infection. Plos One. 2008;3: e3975.  
963 doi: 10.1371/journal.pone.0003975. PubMed PMID: 19092998; PubMed Central PMCID:  
964 PMCPMC2599883.
- 965 58. Yang F, Robotham JM, Nelson HB, Irsigler A, Kenworthy R, Tang H. Cyclophilin A  
966 is an essential cofactor for hepatitis C virus infection and the principal mediator of  
967 cyclosporine resistance in vitro. J Virol. 2008;82: 5269-78. doi: 10.1128/JVI.02614-07.  
968 PubMed PMID: 18385230. PubMed Central PMCID: PMC2395199.
- 969 59. Krupovic M, Koonin EV. Multiple origins of viral capsid proteins from cellular  
970 ancestors. Proc Natl Acad Sci USA. 2017;114: E2401-E10. doi: 10.1073/pnas.1621061114.  
971 PubMed PMID: 28265094; PubMed Central PMCID: PMCPMC5373398.
- 972 60. Brown JR, Doolittle WF. Archaea and the prokaryote-to-eukaryote transition.  
973 Microbiol Mol Biol Rev. 1997;61: 456-502. PubMed PMID: PMC232621. PubMed Central  
974 PMCID: PMC232621.
- 975 61. Van Lint P, Libert C. Chemokine and cytokine processing by matrix  
976 metalloproteinases and its effect on leukocyte migration and inflammation. J Leukoc Biol.  
977 2007;82: 1375-81. doi: 10.1189/jlb.0607338. PubMed PMID: 17709402.
- 978 62. Zhang F, Guo H, Zheng H, Zhou T, Zhou Y, Wang S, et al. Massively parallel  
979 pyrosequencing-based transcriptome analyses of small brown planthopper (*Laodelphax*  
980 *striatellus*), a vector insect transmitting rice stripe virus (RSV). BMC Genomics. 2010;11:  
981 303. doi: 10.1186/1471-2164-11-303. PubMed PMID: 20462456; PubMed Central PMCID:  
982 PMCPMC2885366.
- 983 63. Munoz Mde L, Limon-Camacho G, Tovar R, Diaz-Badillo A, Mendoza-Hernandez G,  
984 Black WCt. Proteomic identification of dengue virus binding proteins in *Aedes aegypti*

- 985 mosquitoes and *Aedes albopictus* cells. Biomed Res Int. 2013;2013: 875958. doi:  
986 10.1155/2013/875958. PubMed PMID: 24324976; PubMed Central PMCID:  
987 PMCPMC3842078.
- 988 64. Colpitts TM, Cox J, Nguyen A, Feitosa F, Krishnan MN, Fikrig E. Use of a tandem  
989 affinity purification assay to detect interactions between West Nile and dengue viral proteins  
990 and proteins of the mosquito vector. Virology. 2011;417: 179-87. doi:  
991 10.1016/j.virol.2011.06.002. PubMed PMID: PMC3166580.
- 992 65. Popova-Butler A, Dean DH. Proteomic analysis of the mosquito *Aedes aegypti*  
993 midgut brush border membrane vesicles. J Insect Physiol. 2009;55: 264-72. doi:  
994 10.1016/j.jinsphys.2008.12.008. PubMed PMID: 19133270; PubMed Central PMCID:  
995 PMCPMC2735124.
- 996 66. Means JC, Passarelli AL. Viral fibroblast growth factor, matrix metalloproteases, and  
997 caspases are associated with enhancing systemic infection by baculoviruses. Proc Natl Acad  
998 Sci USA. 2010;107: 9825-30. doi: 10.1073/pnas.0913582107. PubMed PMID: 20457917;  
999 PubMed Central PMCID: PMCPMC2906863.
- 1000 67. Rojo G, Chamorro M, Salas ML, Vinuela E, Cuezva JM, Salas J. Migration of  
1001 mitochondria to viral assembly sites in African swine fever virus-infected cells. J Virol.  
1002 1998;72: 7583-8. PubMed PMID: 9696857; PubMed Central PMCID: PMCPMC110008.
- 1003 68. Bandla MD, Campbell LR, Ullman DE, Sherwood JL. Interaction of tomato spotted  
1004 wilt tospovirus (TSWV) glycoproteins with a thrips midgut protein, a potential cellular  
1005 receptor for TSWV. Phytopathology. 1998;88: 98-104. doi: 10.1094/PHYTO.1998.88.2.98.  
1006 PubMed PMID: 18944977.
- 1007 69. Bautista RC, Mau RFL, Cho JJ, Custer DM. Potential of tomato spotted wilt  
1008 tospovirus plant hosts in Hawaii as virus reservoirs for transmission by *Frankliniella*  
1009 *occidentalis* (Thysanoptera: Thripidae). Phytopathology. 1995;85: 953-8. doi: 10.1094/Phyto-

- 1010 85-953.
- 1011 70. Martin K, Kopperud K, Chakrabarty R, Banerjee R, Brooks R, Goodin MM. Transient  
1012 expression in *Nicotiana benthamiana* fluorescent marker lines provides enhanced definition  
1013 of protein localization, movement and interactions *in planta*. Plant J. 2009;59: 150-62. doi:  
1014 10.1111/j.1365-313X.2009.03850.x. PubMed PMID: 19309457.
- 1015 71. Cilia M, Fish T, Yang X, McLaughlin M, Thannhauser TW, Gray S. A comparison of  
1016 protein extraction methods suitable for gel-based proteomic studies of aphid proteins. J  
1017 Biomol Tech. 2009;20: 201-15. PubMed PMID: 19721822; PubMed Central PMCID:  
1018 PMC2729484.
- 1019 72. Cilia M, Tamborindéguy C, Fish T, Howe K, Thannhauser TW, Gray S. Genetics  
1020 coupled to quantitative intact proteomics links heritable aphid and endosymbiont protein  
1021 expression to circulative polerovirus transmission. J Virol. 2011;85: 2148-66. doi:  
1022 10.1128/JVI.01504-10. PubMed PMID: 21159868; PubMed Central PMCID: PMC3067806.
- 1023 73. Dobson L, Remenyi I, Tusnady GE. CCTOP: a consensus constrained TOPology  
1024 prediction web server. Nucleic Acids Res. 2015;43: W408-12. doi: 10.1093/nar/gkv451.  
1025 PubMed PMID: 25943549; PubMed Central PMCID: PMC4489262.
- 1026 74. Nielsen H. Predicting secretory proteins with SignalP. Methods Mol Biol.  
1027 2017;1611:59-73. doi: 10.1007/978-1-4939-7015-5\_6. PubMed PMID: 28451972.
- 1028 75. Ioannidou ZS, Theodoropoulou MC, Papandreou NC, Willis JH, Hamodrakas SJ.  
1029 CutProtFam-Pred: detection and classification of putative structural cuticular proteins from  
1030 sequence alone, based on profile hidden Markov models. Insect Biochem Mol Biol. 2014;52:  
1031 51-9. doi: 10.1016/j.ibmb.2014.06.004. PubMed PMID: 24978609; PubMed Central PMCID:  
1032 PMC4143468.
- 1033 76. Magkrioti CK, Spyropoulos IC, Iconomidou VA, Willis JH, Hamodrakas SJ.  
1034 cuticleDB: a relational database of Arthropod cuticular proteins. BMC Bioinformatics.

- 1035 2004;5: 138. doi: 10.1186/1471-2105-5-138. PubMed PMID: 15453918; PubMed Central  
1036 PMCID: PMCPMC522807.
- 1037 77. Kumar S, Stecher G, Tamura K. MEGA7: molecular evolutionary genetics analysis  
1038 version 7.0 for bigger datasets. *Mol Biol Evol.* 2016;33: 1870-4. doi:  
1039 10.1093/molbev/msw054. PubMed PMID: 27004904.
- 1040 78. Schwarz R, Dayhoff M. Matrices for detecting distant relationships. In: Dayhoff M,  
1041 editor. *Atlas of protein sequences*: National Biomedical Research Foundation; 1979. p. 353-8.
- 1042 79. Jones DT, Taylor WR, Thornton JM. The rapid generation of mutation data matrices  
1043 from protein sequences. *Comput Appl Biosci.* 1992;8: 275-82. PubMed PMID: 1633570.
- 1044 80. Kim JW. Disease resistance in tobacco and tomato plants transformed with the  
1045 Tomato spotted wilt virus nucleocapsid gene. *Plant Dis.* 1994;78: 615-21. doi: 10.1094/PD-  
1046 78-0615.
- 1047 81. Adkins S, Choi TJ, Israel BA, Bandla MD, Richmond KE, Schultz KT, et al.  
1048 Baculovirus expression and processing of tomato spotted wilted tospovirus glycoproteins.  
1049 *Phytopathology.* 1996;86: 849-55. doi: 10.1094/Phyto-86-849.
- 1050 82. Chakrabarty R, Banerjee R, Chung SM, Farman M, Citovsky V, Hogenhout SA, et al.  
1051 PSITE vectors for stable integration or transient expression of autofluorescent protein fusions  
1052 in plants: probing *Nicotiana benthamiana*-virus interactions. *Mol Plant Microbe Interact.*  
1053 2007;20: 740-50. doi: 10.1094/MPMI-20-7-0740. PubMed PMID: 17601162.

1054

1055

## 1056 **Figure Legends**

1057

1058 **Fig 1. Overlay assay using purified virions and *F. occidentalis* first instar proteins**  
1059 **resolved in two-dimensional gels.**

1060 Total proteins (150  $\mu$ g) extracted from pooled healthy first instar larvae (0-17-hour old) of *F.*  
1061 *occidentalis* were resolved by 2-D gel electrophoresis and transferred to nitrocellulose  
1062 membranes that were used for virus overlay assays. After blocking, membranes were  
1063 incubated overnight with purified TSWV at 25  $\mu$ g/mL (B) or blocking buffer (A) (negative  
1064 control) respectively and then incubated with polyclonal rabbit anti-TSWV G<sub>N</sub> antiserum.  
1065 Only protein spots that consistently bound to purified TSWV in three (spots 1, 2, 4, 6, and 7)  
1066 and four (spots 3, 5, and 8) replicates of the virus overlay assay were collected from three  
1067 individual picking gels and subjected to ESI mass spectrometry for protein identification.  
1068 Protein spots observed in the no overlay control membrane represent non-specific binding  
1069 and were not collected for further analysis. Molecular mass (in kilodaltons) is shown on the Y  
1070 axis and pI (as pH range) is shown on the X axis.

1071

1072 **Fig 2. Overlay assay using recombinant G<sub>N</sub> and *F. occidentalis* first instar proteins**  
1073 **resolved in two-dimensional gels.**

1074 150  $\mu$ g total proteins extracted from pooled healthy first instar larvae (0-17-hour old) of *F.*  
1075 *occidentalis* were resolved by 2-D gel electrophoresis and transferred to nitrocellulose  
1076 membranes that were used for overlay assays. The membranes were incubated overnight with  
1077 recombinant TSWV G<sub>N</sub> (3.5  $\mu$ g/mL) (B) or blocking buffer (A). Using the polyclonal rabbit  
1078 anti-TSWV G<sub>N</sub>, protein spots that consistently bound to the recombinant TSWV G<sub>N</sub> in two  
1079 (spots 1 through 11) replicates of the overlay assay were collected from two individual  
1080 picking gels and subjected to ESI mass spectrometry for protein identification. Protein spots  
1081 observed in the no overlay control membrane represent non-specific binding and were not  
1082 collected for further analysis. Molecular mass (in kilodaltons) is shown on the Y axis and pI  
1083 (as pH range) is shown on the X axis.

1084



1085 **Fig 3. Validation of TSWV N/G<sub>N</sub>-TIPs and G<sub>N</sub>-partial endoCP-G<sub>N</sub> using split-ubiquitin**  
1086 **membrane-based yeast two hybrid (Mby2H).** (A) Interactions between TSWV N, (B) G<sub>N</sub>  
1087 and six TIPs. TSWV N and G<sub>N</sub> were expressed as N/G<sub>N</sub>-Cub, and TIPs were expressed as  
1088 NubG-TIPs using Mby2H vectors. (C) Interactions between TSWV G<sub>N</sub> and different regions  
1089 of endoCP-G<sub>N</sub>. EndoCP-G<sub>N</sub> was expressed as either the N-terminal domain (amino acids 1-  
1090 176 and 1-189) that includes the non-conserved region or the C-terminal region (amino acids  
1091 177-284 and 190-284) that includes the conserved Chitin\_bind\_4 motif (CHB4) of endoCP-  
1092 G<sub>N</sub>. Interactions between TSWV proteins and NubI or NubG were used as positive and  
1093 negative controls respectively. Co-transformation of pTSU2-APP and pNubG-Fe65 into  
1094 NYM51 was used as another positive control (data not shown). DDO represents yeast double  
1095 dropout (SD/-Leu/-Trp) media, and QDO represents yeast quadruple dropout (SD/-Ade/-His/-  
1096 Leu/-Trp) media.

1097

1098 **Fig 4. Confirmation of interactions between TSWV proteins and TIPs using**  
1099 **bimolecular fluorescence complementation (BiFC) in *N. benthamiana*.** Plants transgenic  
1100 for a nuclear marker fused to CFP, CFP-H2B, were infiltrated with suspensions of TIPs  
1101 proteins fused to either the amino or carboxy terminus of YFP. The interactions that tested  
1102 positive as seen by fluorescence of YFP are indicated in the BiFC column. The CFP-H2B  
1103 column is indicated to give cellular reference and the overlay between the two is also shown.  
1104 The final column is the nucleus enlarged to show detail of the interacting TIPs with cellular  
1105 context. One infiltration with a TIP and glutathione S-transferase is included as a  
1106 representative of a non-binding control image. All scale bars are equal to 20 μM.

1107

1108 **Fig 5. Immunolabeling of TIPs within first instar larvae of *F. occidentalis*.** The  
1109 synchronized first instar larvae (0-17-hour old) were kept on 7% sucrose solution for 3 hours

1110 to clean their guts from plant tissues. These larvae were then dissected and immunolabeled  
1111 using specific antibodies against each TIP as indicated. Thrips tissues incubated with pre-  
1112 immune mouse serum are depicted here. Confocal microscopy detected the green  
1113 fluorescence (Alexa Fluor 488) that represents the localization of each TIP. TIPs were mainly  
1114 localized at foregut (FG), midgut (MG) that include epithelial cells and visceral muscle  
1115 (VM), principle salivary glands (PSG), tubular salivary glands (TSG), and Malpighian  
1116 tubules (MT). All scale bars are equal to 50  $\mu$ M.

1117

1118 **Fig 6. Co-localization of TSWV ( $G_N$ ) and endoCP- $G_N$  or cyclophilin within *F.***  
1119 ***occidentalis*.** The synchronized first instar larvae (0-17-hour old) were fed on TSWV  
1120 symptomatic or healthy *E. sonchifolia* leaves for 24, 48 and 72 hours. At each time point,  
1121 thrips larvae were collected and kept on 7% sucrose solution for 3 hours before dissection.  
1122 Specific antibodies against TSWV ( $G_N$ ), endoCP- $G_N$  and cyclophilin were used to label virus  
1123 and TIPs. Alexa Fluor 488 (green) labeled TSWV ( $G_N$ ) that represents the localization of  
1124 TSWV ( $G_N$ ) and Alexa Fluor 594 (red) labeled endoCP- $G_N$  and cyclophilin, which represent  
1125 the localization of TIPs. Thrips that fed on healthy *E. sonchifolia* leaves were used as control,  
1126 in which green fluorescence was not detected and signal from these insects were used to  
1127 adjust confocal microscope settings to remove background fluorescence. TIPs and TSWV  
1128 were co-localized at anterior midgut (MG1) that include epithelial cells and visceral muscle  
1129 (VM) (from 24h to 72h). FG, foregut; PSG, principle salivary glands; TSG, tubular salivary  
1130 glands. All scale bars are equal to 50  $\mu$ M.

1131

1132 **Supporting Information**

1133 **S1 Fig. Phylogenetic analysis of CP R&R consensus sequences in first instar larvae of *F.***

1134 *occidentalis*. The Neighbor-Joining (NJ) method was performed with the Jones Taylor  
1135 Thornton (JTT) matrix-based method for amino acid substitutions with Gamma distribution to  
1136 model the variation among sites. The bootstrap consensus tree (500 replicates) was generated  
1137 by the NJ algorithm with pairwise deletion for handling gaps. Branches corresponding to  
1138 partitions reproduced in less than 70% bootstrap replicates were collapsed. The numbers  
1139 shown next to branches indicate the percentage of replicate trees in which the associated taxa  
1140 (sequences) clustered together in the bootstrap test. The analysis involved 46 sequences – the  
1141 three cuticular TSWV-interacting proteins (TIPs: cuticle protein-V (CP-V), endocuticle  
1142 structural glycoprotein-V (endoCP-V) and endocuticle structural glycoprotein-G<sub>N</sub> (endoCP-  
1143 G<sub>N</sub>) (blue text), the ‘gold-standard’ Pfam database extended R&R consensus sequence  
1144 (pf00379), 19 insect orthologous sequences obtained from NCBI GenBank, and 23 structural  
1145 CPs and endoCPs (translated transcripts, designated with FOCC or CUFF identifiers)  
1146 previously reported to be differentially-expressed in TSWV-infected L1s of *F. occidentalis*  
1147 (27). There were 95 amino-acid positions in the final dataset. RR1 and RR2 = Cuticle Protein  
1148 Rebers and Riddiford (CPR family, RR1 and RR2 types) extended consensus, a conserved  
1149 chitin-binding motif (chitin\_bind\_4 = CHB4).

1150

1151 **S2 Fig. Localization in *N. benthamiana* of TIPs fused green fluorescent protein (GFP).**

1152 *N. benthamiana* transgenic for an RFP-ER marker were infiltrated with *Agrobacterium*  
1153 *tumefaciens* strain LBA 4404 suspensions of TIPs constructs. Each row indicates the specific  
1154 TIP-GFP fusion in relation to the RFP-ER marker. The columns are as follows: GFP  
1155 channel, RFP channel and the overlay between the two channels. All scale bars are equal to  
1156 20 μM.

1157

1158 **S3 Fig. Individual channels of immune-labeled TIPs within first instar larvae of *F.***  
1159 ***occidentalis*.** The synchronized first instar larvae (0-17-hour old) were dissected and  
1160 immunolabeled using specific antibodies against each TIP as indicated. Thrips tissues  
1161 incubated with pre-immune mouse antiserum as controls are depicted here. Confocal  
1162 microscopy detected green fluorescence (Alexa Fluor 488) that represents the localization of  
1163 each TIP, red represents Alexa Fluor 594 labeled actin; blue represents DAPI labeled nuclei.  
1164 All scale bars are equal to 50  $\mu$ M.

1165

1166 **S4 Fig. Individual channels of immunolabeled thrips that were fed on TSWV or healthy**  
1167 ***E. sonchifolia*.** The synchronized first instar larvae (0-17-hour old) were fed on TSWV  
1168 symptomatic or healthy *E. sonchifolia* leaves for 24, 48 and 72 hours. Plant tissues were  
1169 removed and thrips alimentary canals were cleared, dissected and incubated with antisera  
1170 against cyclophilin, endoCP-G<sub>N</sub> and TSWV (G<sub>N</sub>) as indicated. Red, Alexa Fluor 594 labeled  
1171 TIPs; green, Alexa Fluor 488 labeled TSWV (G<sub>N</sub>), purple, Alexa Fluor 594 labeled actin;  
1172 blue, DAPI labeled nuclei.

1173

1174

10

pH

3

10

pH

3

**A****B**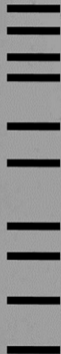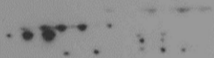

250 kDa  
150 kDa  
100 kDa  
75 kDa  
50 kDa  
37 kDa  
25 kDa  
20 kDa  
15 kDa  
10 kDa

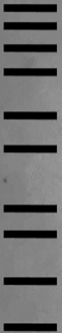

7 → ← 8

← 5  
← 4  
← 3

1 →

← 6

↑ 2

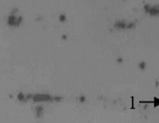

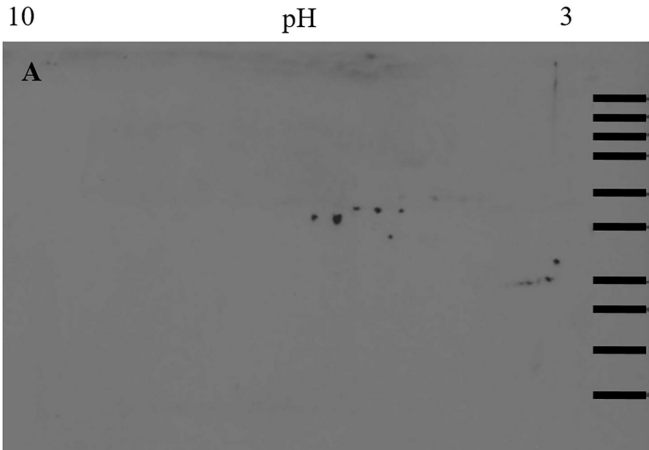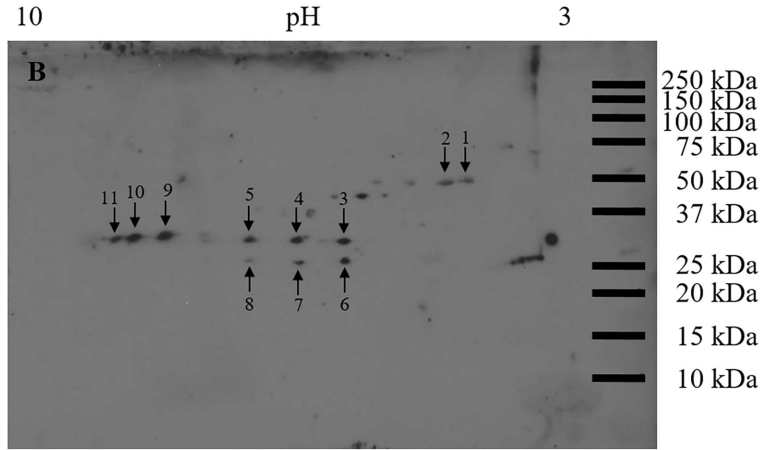

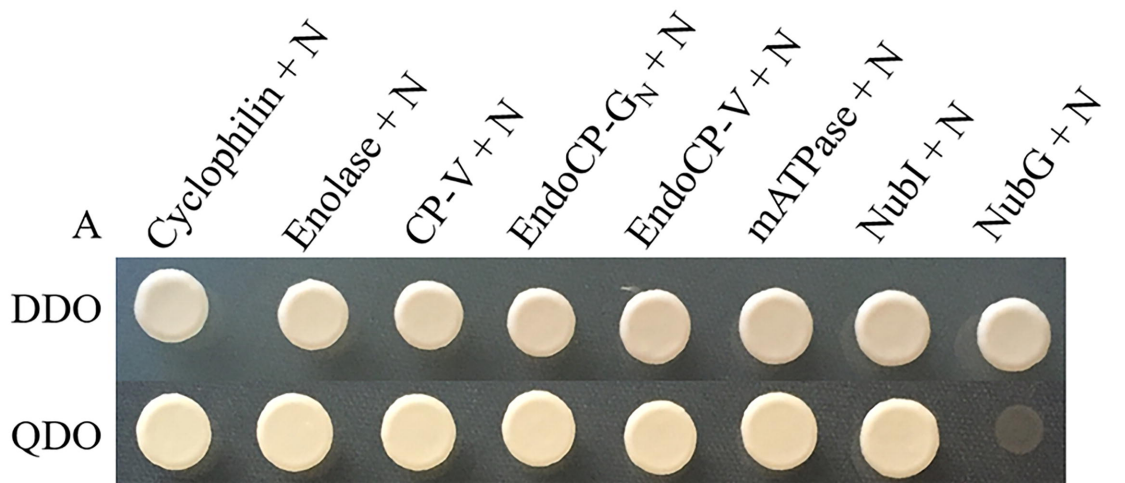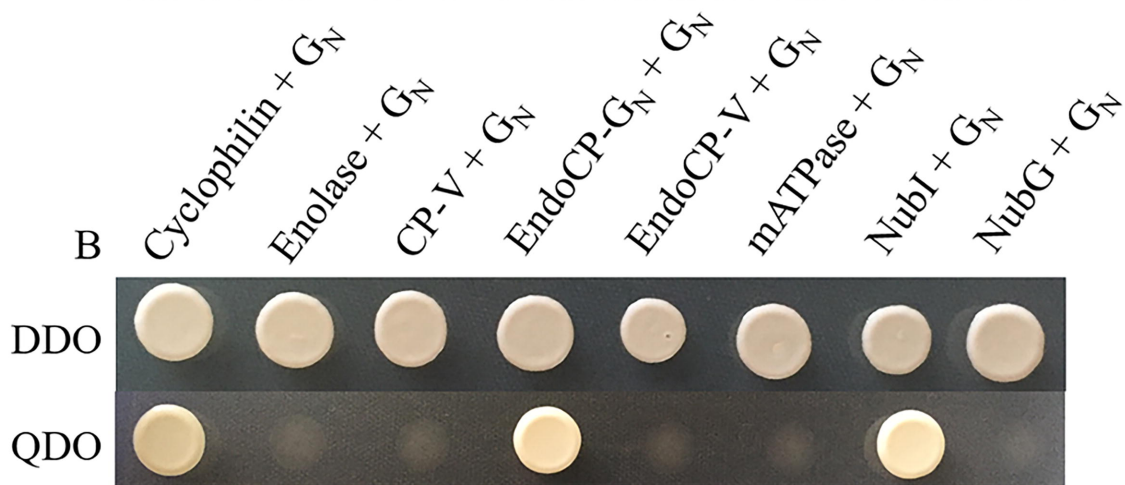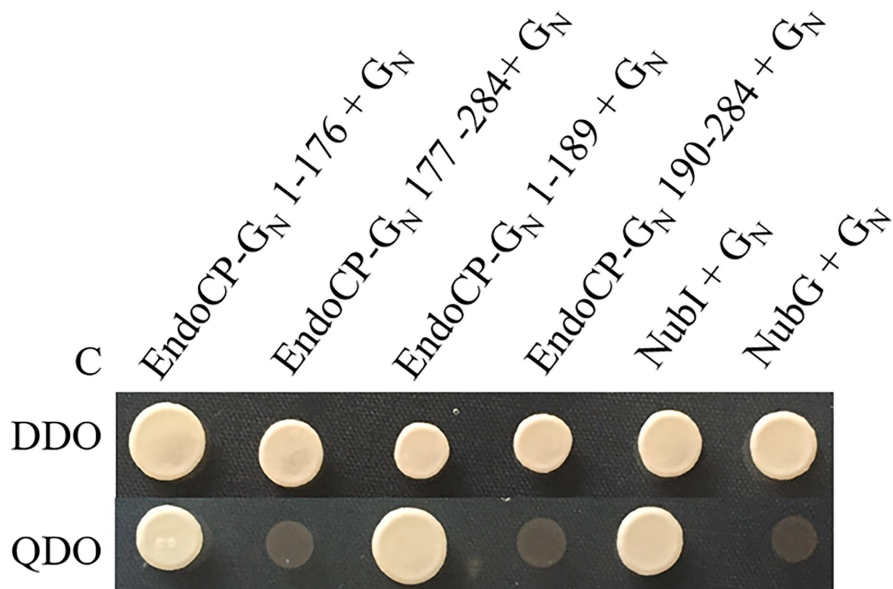

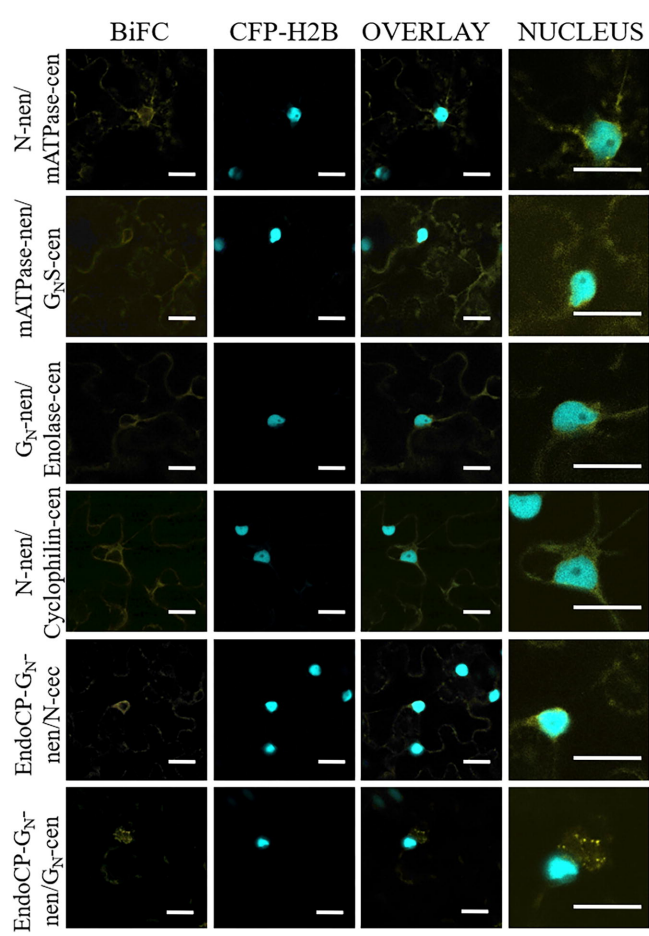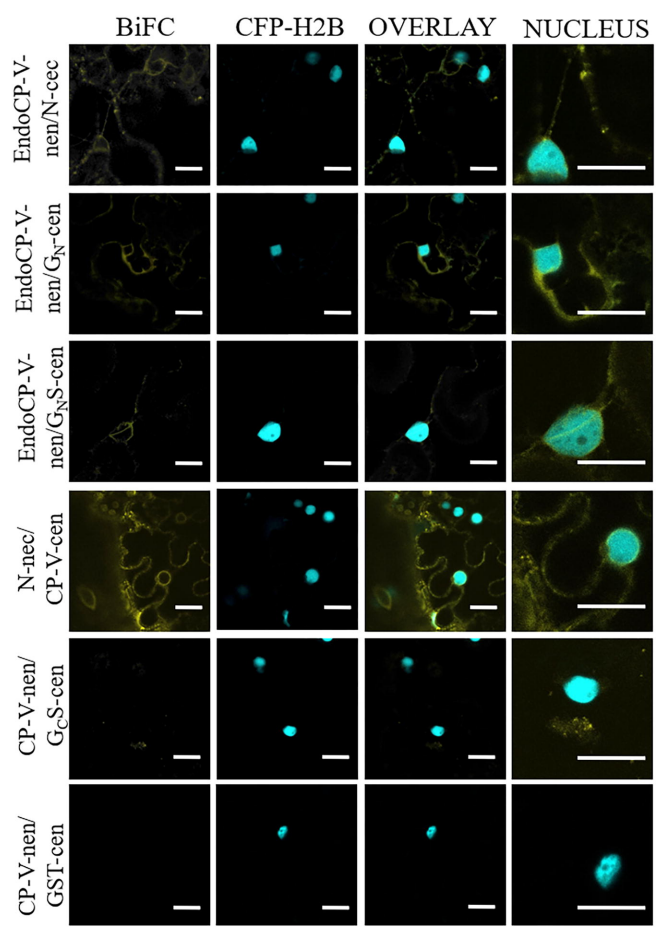



Pre-immune serum control

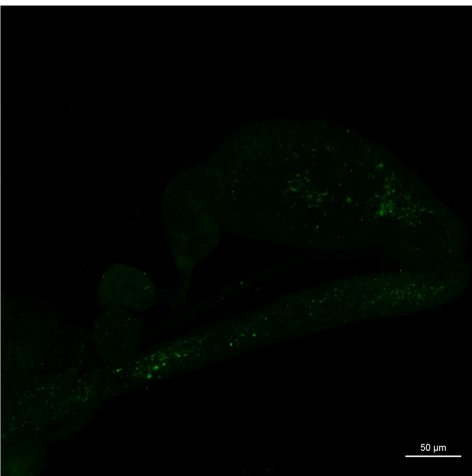

Cyclophilin

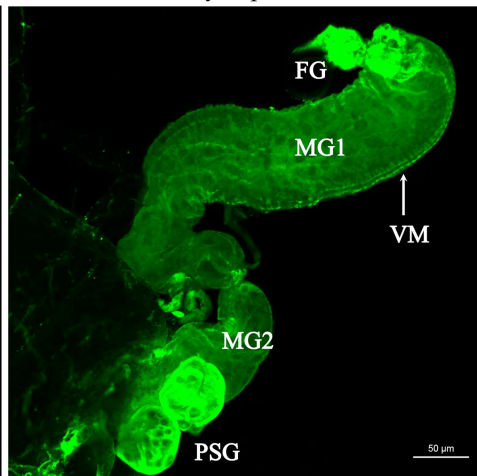

Enolase

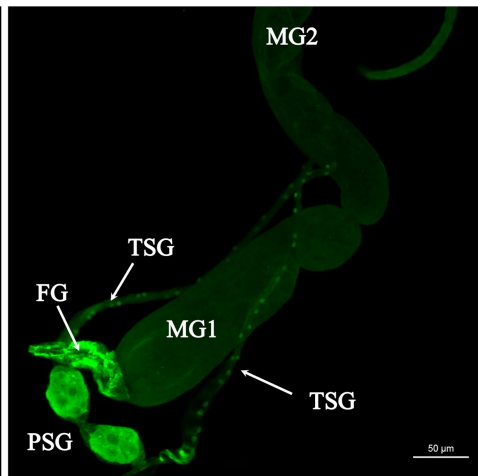

CP-V

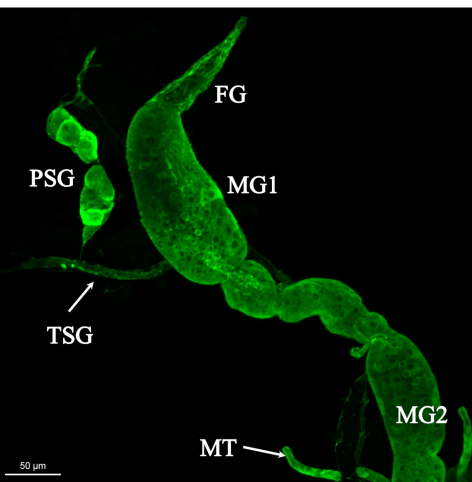EndoCP-G<sub>N</sub>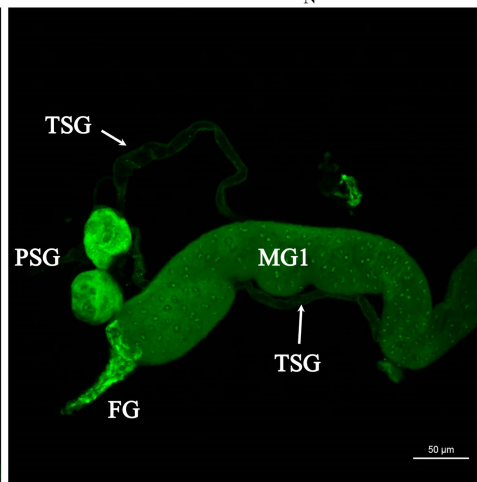

EndoCP-V

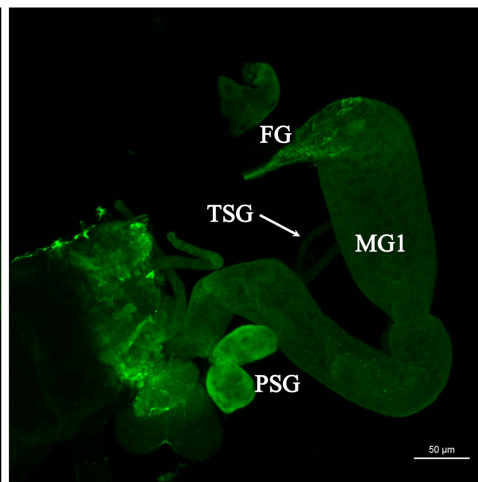

24 hpi

48 hpi

72 hpi

Cyclophilin + TSWV (G<sub>N</sub>)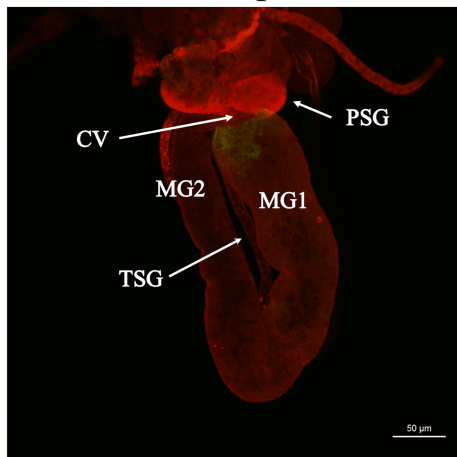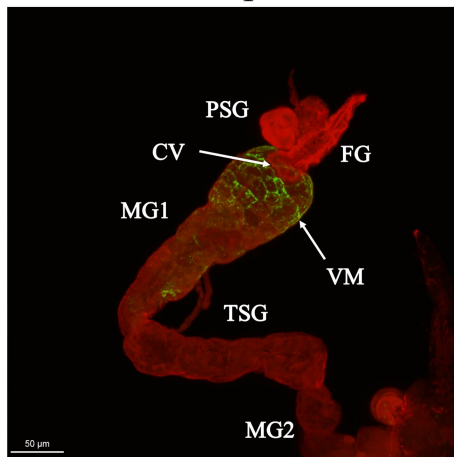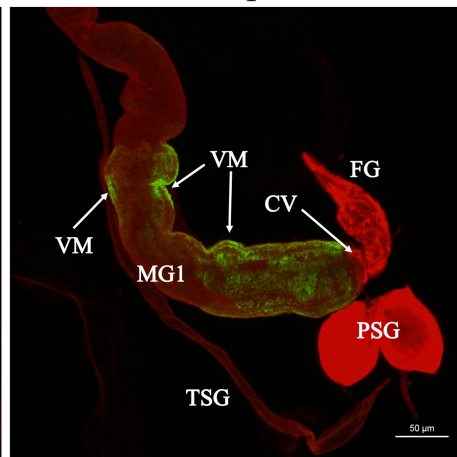EndoCP-G<sub>N</sub> + TSWV (G<sub>N</sub>)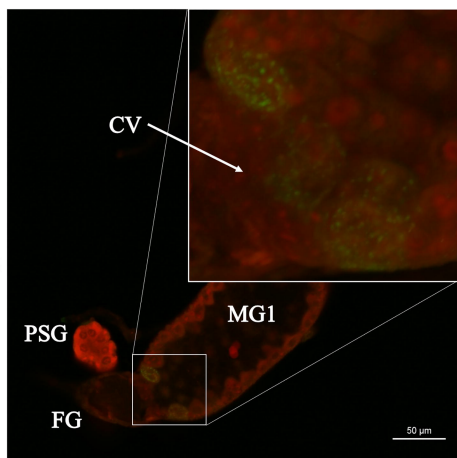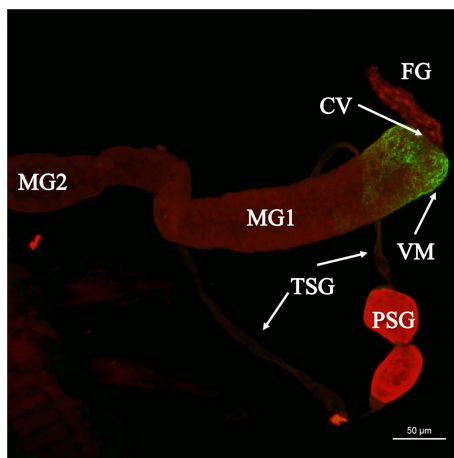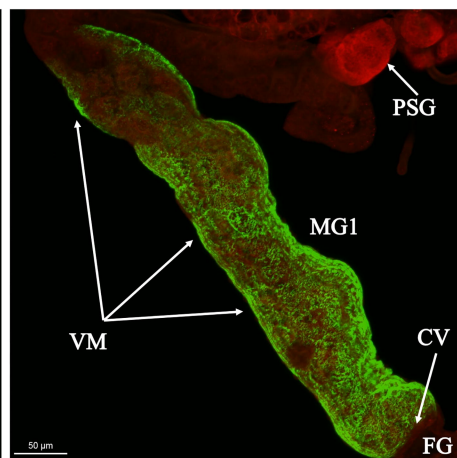Un-infected control (EndoCP-G<sub>N</sub>)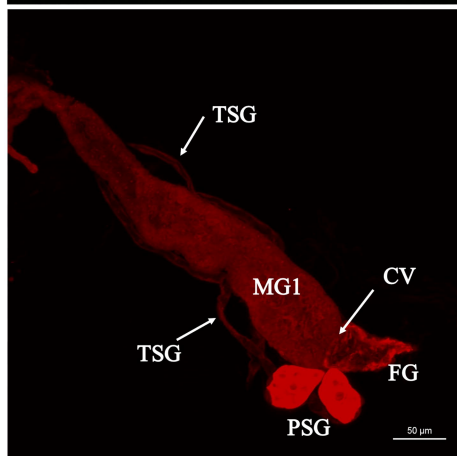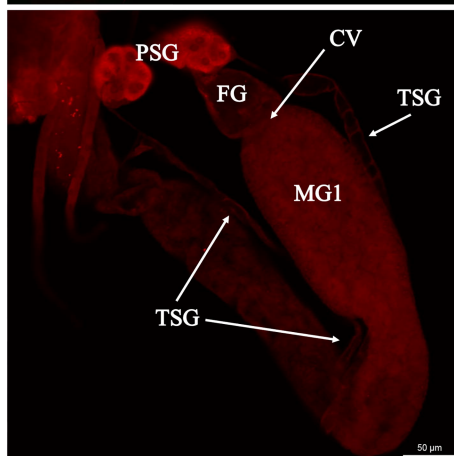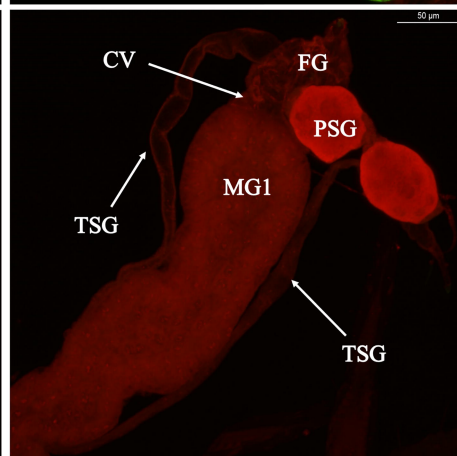

Source: https://www.biorxiv.org/content/10.1101/416560v1.full.pdf
