1 **Discovery of novel thrips vector proteins that bind to the viral attachment**  
2 **protein of the plant bunyavirus, tomato spotted wilt virus**

3 Ismael E. Badillo-Vargas<sup>\*a</sup>, Yuting Chen<sup>\*b</sup>, Kathleen M. Martin<sup>b</sup>, Dorith Rotenberg<sup>b#</sup>, and  
4 Anna E. Whitfield<sup>b#</sup>

5 <sup>a</sup>Department of Entomology, Texas A&M AgriLife Research, Weslaco, Texas, United States  
6 of America

7 <sup>b</sup>Department of Entomology and Plant Pathology, North Carolina State University, Raleigh,  
8 North Carolina, United States of America

9

10 Running head: Thrips proteins that interact with TSWV G<sub>N</sub>

11

12 \* IEBV and YC are joint first authors and contributed equally to this work.

13

14 # Address correspondence to:

15 Anna E. Whitfield [awhitfi@ncsu.edu](mailto:awhitfi@ncsu.edu) and Dorith Rotenberg [drotenb@ncsu.edu](mailto:drotenb@ncsu.edu)

16 **Abstract**

17 The plant-pathogenic virus, tomato spotted wilt virus (TSWV), encodes a structural  
18 glycoprotein (G<sub>N</sub>) that, like with other bunyavirus/vector interactions, serves a role in viral  
19 attachment and possibly entry into arthropod vector host cells. It is well documented that  
20 *Frankliniella occidentalis* is one of seven competent thrips vectors of TSWV transmission to  
21 plant hosts, however, the insect molecules that interact with viral proteins, such as G<sub>N</sub>, during  
22 infection and dissemination in thrips vector tissues are unknown. The goals of this project

23 were to identify TSWV-interacting proteins (TIPs) that interact directly with TSWV  $G_N$  and  
24 to localize expression of these proteins in relation to virus in thrips tissues of principle  
25 importance along the route of dissemination. We report here the identification of six TIPs  
26 from first instar larvae (L1), the most acquisition-efficient developmental stage of the thrips  
27 vector. Sequence analyses of these TIPs revealed homology to proteins associated with the  
28 infection cycle of other vector-borne viruses. Immunolocalization of the TIPs in L1s revealed  
29 robust expression in the midgut and salivary glands of *F. occidentalis*, the tissues most  
30 important during virus infection, replication and plant-inoculation. The TIPs and  $G_N$   
31 interactions were validated using protein-protein interaction assays. Two of the thrips  
32 proteins, endocuticle structural glycoprotein and cyclophilin, were found to be consistent  
33 interactors with  $G_N$ . These newly discovered thrips protein- $G_N$  interactions are essential  
34 towards better understanding of transmission of persistent propagative plant viruses by their  
35 vectors, as well as for developing new strategies of insect pest management and virus  
36 resistance in plants.

## 37 **Importance Statement**

38 Thrips-transmitted viruses cause devastating losses to numerous food crops worldwide. For  
39 negative-sense RNA viruses that infect plants, the arthropod serves as a host as well by  
40 supporting virus replication in specific tissues and organs of the vector. The goal of this work  
41 was to identify vector/host proteins that bind directly to the viral attachment protein and thus  
42 may play a role in the infection cycle in the insect. Using the model plant bunyavirus, tomato  
43 spotted wilt virus (TSWV), and the most efficient thrips vector, we identified and validated  
44 six TSWV-interacting proteins from *Frankliniella occidentalis* first instar larvae. Two  
45 proteins, an endocuticle structural glycoprotein and cyclophilin, were able to interact directly  
46 with the TSWV attachment protein,  $G_N$ , in insect cells. The TSWV  $G_N$ -interacting proteins

47 provide new targets for disrupting the virus-vector interaction and could be putative  
48 determinants of vector competence.

## 49 **Introduction**

50 Vector-borne diseases caused by animal- and plant-infecting viruses are some of the  
51 most important medical, veterinary, and agricultural problems worldwide (1, 2). The majority  
52 of viruses infecting plants and animals are transmitted by arthropods. Understanding the viral  
53 and arthropod determinants of vector competence is important for basic knowledge of virus-  
54 vector interactions and development of new interdiction strategies to control disease.  
55 Significant progress has been made towards identification of viral determinants of  
56 transmission, but the interacting molecules in vectors remain largely elusive. For negative-  
57 sense RNA viruses, vector factors that mediate the transmission process have not been well  
58 characterized.

59 *Bunyavirales* is the largest order of negative-sense RNA viruses; twelve families are  
60 described (<http://www.ictvonline.org/virustaxonomy.asp>). The *Bunyavirales* contains plant  
61 and insect vector-infecting viruses that make up the Family *Tospoviridae* (3-5). Within this  
62 family, there are eighteen species and several unassigned viruses that most likely will be  
63 classified as unequivocal members of the *Orthotospovirus* genus. *Tomato spotted wilt*  
64 *orthotospovirus* is the type species within this genus and has been best characterized in terms  
65 of viral host range, genome organization and protein functions (6, 7).

66 Tomato spotted wilt virus (TSWV) infects both monocotyledonous and dicotyledonous  
67 plants encompassing more than 1,000 plant species worldwide (8). Due to the extremely wide  
68 host range, TSWV has caused severe economic losses to various agricultural, vegetable and  
69 ornamental crops. The TSWV virion has a double-layered, host-derived membrane studded  
70 with two glycoproteins ( $G_N$  and  $G_C$ ) on the surface. The viral glycoproteins play an essential

71 role in attachment to the thrips gut and fusion of the virus and host membrane (7, 9-11). Virus  
72 particles range in size from 80 to 120 nm in diameter, and inside the particle are three  
73 genomic RNAs designated long (L), medium (M) and small (S) RNA based on the relative  
74 size of each molecule.

75 Although TSWV can be maintained in the laboratory through mechanical inoculation, it  
76 is transmitted in nature by insect vectors commonly known as thrips (Order Thysanoptera,  
77 Family *Thripidae*). Five species of *Frankliniella* and two species of *Thrips* are reported to be  
78 the vectors of TSWV (6). Among these species, the western flower thrips, *Frankliniella*  
79 *occidentalis* Pergande, is the most efficient vector of TSWV and it has a worldwide  
80 distribution. TSWV is transmitted by thrips vectors in a persistent propagative manner, and  
81 the midgut cells and primary salivary glands are two major tissues for TSWV replication (12,  
82 13). Only thrips that acquire virus during the early larval stage are inoculative as adults (13-  
83 15). Because the TSWV  $G_N$  protein has been identified to bind to thrips midguts and play a  
84 role in virus acquisition by thrips (9-11), we sought to identify thrips proteins that interact  
85 directly with  $G_N$ , the viral attachment protein (16). Using gel overlay assays to identify first  
86 instar larval (L1) proteins that bind to purified virions or  $G_N$ , we discovered six TSWV-  
87 interacting proteins (TIPs) from *F. occidentalis*. Identification of these proteins using mass  
88 spectrometry was followed with secondary assays to validate the interactions and characterize  
89 protein expression in larval thrips. Two TIPs, an endocuticle structural glycoprotein and  
90 cyclophilin, interacted with  $G_N$  and co-localized with  $G_N$  when co-expressed in insect cells.  
91 These thrips proteins may play a role in virus entry or mediate other steps in the virus  
92 infection process in thrips. These proteins represent the first thrips proteins that bind to  
93 TSWV proteins, and these discoveries provide insights toward a better understanding of the  
94 molecular interplay between vector and virus.

95

## 96 **Results**

### 97 **Identification of bound *F. occidentalis* larval proteins using overlay assays**

98 Proteins extracted from first instar larvae bodies were separated by 2-D electrophoresis,  
99 and overlay assays were performed with purified TSWV virions or recombinant G<sub>N</sub>  
100 glycoprotein to identify bound thrips proteins. Virion overlays identified a total of eight  
101 proteins spots (Fig. 1) - three occurred consistently in all four biological replicates, while five  
102 were present in three. Mass spectrometry and subsequent peptide sequence analysis against a  
103 454-transcriptome database (*Fo* Seq) identified one to four different transcript matches per  
104 spot (Table 1), where in four cases, the same putative transcript matched peptides in more  
105 than one spot. Using recombinant G<sub>N</sub> glycoprotein, 11 protein spots were detected in both  
106 biological replicates of the overlay assay (Fig. 2), and each spot was comprised of a single  
107 protein (single transcript match) occurring in multiple spots - there were a total of two  
108 different G<sub>N</sub>-interacting proteins represented by the 11 spots (Table 2). For each overlay  
109 experiment that was run, a control blot was included to identify background, *i. e.*, non-  
110 specific binding by the primary and secondary antibodies, demonstrating detection of the  
111 positively identified spots well-exceeded background (Fig. 1 and 2). In an additional gel  
112 overlay assay using virus-free plant extract (mock purification) obtained from healthy *D.*  
113 *stramonium* plants, no protein spots above the antibody control were detected (data not  
114 shown).

115

### 116 **Annotation of six candidate TSWV-interacting proteins (TIPs)**

117 Our stringent sequence-filtering criteria retained four different virion-interacting proteins  
118 [endocuticle structural glycoprotein: endoCP-V (contig01248, GenBank accession:

119 MH884756); cuticular protein: CP-V (CL4900Contig1, MH884758), cyclophilin  
120 (CL4854Contig1, MH884760), and enolase (CL4706Contig1, MH884759), Table 1] and two  
121 G<sub>N</sub>-interacting proteins [mitochondrial ATP synthase  $\alpha$ , mATPase (CL4310Contig1,  
122 MH884761) and endocuticle structural glycoprotein; endoCP-G<sub>N</sub> (CL4382Contig1,  
123 MH884757), Table 2] to move forward to validation and biological characterization.  
124 Collectively, these six protein candidates are referred to as ‘TSWV-Interacting Proteins’ or  
125 TIPs and their putative identifications and sequence features are shown in Table 3. Blastp  
126 analysis of the predicted, longest complete ORFs confirmed their annotations and putative  
127 sequence homology to proteins in other insects. The three cuticle-associated TIPs (endoCP-  
128 G<sub>N</sub>, endoCP-V, and CP-V) contained predicted signal peptide sequences, indication of  
129 secreted proteins, and a chitin-binding domain (CHB4). Pairwise alignments (Blastp)  
130 between the translated ORFs of the three cuticle TIPs and the six other gel overlay-resolved  
131 CPs or endoCPs revealed sequence diversity; where matches among the different cuticle  
132 proteins occurred (cut-off =  $E < 10^{-3}$ ), % amino acid identities ranged from 53% – 67%,  
133 covering 30% – 49% of the queries, with e-values ranging from  $2.4 \times 10^{-2}$  –  $3.6 \times 10^{-24}$ . The  
134 only exception was the CP-V and contig00018 alignment, which appeared to be 100%  
135 identical along the entire length of contig00018 ( $E = 2.6 \times 10^{-162}$ ) (data not shown). The other  
136 three TIPs (cyclophilin, enolase and mATPase) contained motifs characteristic of these  
137 proteins (Table 3).

### 138 **Classification of cuticular TIPs**

139 All three cuticular TIPs were classified as members of the Cuticle Protein - R&R  
140 Consensus motif (CPR) family (17) based on the occurrence of one RR extended consensus  
141 CHB4, with both endoCP-G<sub>N</sub> ( $E = 4 \times 10^{-18}$ ) and endoCP-V ( $E = 1 \times 10^{-26}$ ) predicted to  
142 belong to the RR1 group, and CP-V weakly supported ( $E = 5 \times 10^{-6}$ ) to belong to the RR2  
143 group of CPRs. All three sequences were phylogenetically placed into the RR1 major clade

144 with strong bootstrap support (82%, Fig. S1) in relation to other *F. occidentalis* CPRs  
145 previously found to be downregulated in TSWV-infected first instar larvae (18) and CPRs of  
146 other insect species. Within the RR1 clade, the CP-V CHB4 domain clustered with a CP of  
147 the small brown planthopper, *Laodelphax striatella* (KC485263.1, CprBJ), reported to bind to  
148 the nucleocapsid protein pc3 of rice stripe virus (RSV) during infection of the vector (19) and  
149 which was predicted ( $E = 5 \times 10^{-7}$ ) to be classified in the RR1 group.

150

### 151 **Antisera show specificity against each TIP-peptide**

152 The antisera specifically bound to their TIP peptides in dot-blot assays (Fig. 3), although the  
153 affinity of each antibody to its cognate TIP peptide varied. The mATPase antibody had  
154 highest affinity to mATPase peptide, while the CP-V antibody had lowest affinity to CP-V  
155 peptide (the high concentration of CP-V peptide, 2.5 mg/mL was used, and all primary and  
156 secondary antibody incubation time was doubled, and the developing time for  
157 chemiluminescence detection was increased). This result demonstrates the specificity of the  
158 TIP-peptide antibodies that were used in subsequent localization experiments with first instar  
159 thrips larvae.

### 160 ***In vivo* localization of TIPs in *F. occidentalis* in midguts and salivary glands**

161 Specific antisera raised against each confirmed TIP was used in immunolabeling  
162 experiments to localize protein expression in L1 tissues *in vivo*. Visualization by confocal  
163 microscopy revealed that all six TIPs were primarily localized at the foregut (esophagus),  
164 midgut (epithelial cells and visceral muscle), salivary glands (including both primary and  
165 tubular salivary glands), and Malpighian tubules (Fig. 4), and this was the case in 100% of  
166 the dissected tissues treated with TIP-specific antisera. It was difficult to completely dissect  
167 and separate hindgut from the carcass without damaging the tissue, therefore, the localization  
168 of TIPs in the hindgut was unclear. For each experimental replicate and unique antibody,

169 controls of secondary antibody only and pre-immune serum plus secondary antibody were  
170 conducted and visualized by confocal microscopy. The confocal laser settings (power and  
171 percent/gain) were adjusted to remove any background fluorescence observed with pre-  
172 immune serum for each TIP as they showed slightly higher background compared to the  
173 secondary antibody control. The bright field and merged images of these controls, depicting  
174 actin- and nuclei-labeling, are shown in Fig. S2.

175

### 176 **Validation of interactions between TIPs and TSWV $G_N$ using BiFC**

177 Before launching a BiFC analysis of candidate protein interactions *in planta*, it is critical  
178 to determine if position of a fused fluorescent protein tag (N- or C-terminus of the candidate  
179 protein) affects the expression and/or localization of the fusion protein in cells. Furthermore,  
180 it was expected that the signal peptides located on the N-terminus of the soluble ( $G_N$ -S) and  
181 insoluble ( $G_N$ ) TSWV glycoprotein, and the cuticular TIPs (CP-V, endoCP-V, endoCP- $G_N$ ),  
182 would preclude placement of tags at the N-terminus of these proteins. GFP fused to the N-  
183 terminus of the glycoprotein ( $G_N$  and  $G_N$ -S), the cuticle TIPs (endoCP- $G_N$  and endoCP-V),  
184 and mATPase  $\alpha$  produced weak signal or reduced mobility in the cell (data not shown). For  
185 the remaining proteins, there was no effect of fluorescent-protein tag location on protein  
186 expression or mobility. Thus, all protein localization and BiFC validation experiments were  
187 performed with C-terminally fused TIPs for consistency in the assays.

188 The GFP-TIP fusions displayed distinct cellular localization patterns when expressed in  
189 plants (Fig. S3). Cyclophilin and mATPase appeared to be localized to the nuclei and along  
190 the cell periphery, while enolase and CP-V were present in the membranes surrounding the  
191 nuclei as well as the cell periphery. Both endoCP- $G_N$  and endoCP-V had a punctate  
192 appearance outside of the nucleus. All three cuticular TIPs (CP-V, endoCP- $G_N$ , endoCP-V)  
193 formed small bodies that appeared to be moving along the endo-membranes of the cell,



194 consistent with secretion. All TIPs were co-localized with the ER marker; however, none  
195 appeared to be co-localized with the Golgi marker (data not shown).

196 BiFC analysis validated the TSWV-TIPs interactions identified in the overlay assays  
197 between virions and  $G_N$  and enolase, m-ATPase, endoCP- $G_N$  and endoCP-V (Fig. 5). We  
198 used the soluble form of the viral glycoprotein ( $G_N$ -S) and the insoluble form with the  
199 transmembrane domain and cytoplasmic tail in BiFC assays. The insoluble form of  $G_N$   
200 interacted with enolase, endoCP- $G_N$  and endoCP-V. The proposed ectodomain of  $G_N$ -S  
201 interacted with mATPase and endoCP-V. All of the BiFC interactions were detected in the  
202 membranes surrounding the nuclei and at the cell periphery, generally consistent with the  
203 localization patterns of the GFP-fused TIPs as described for the localization experiment  
204 above (Fig. S3).

#### 205 **Validation of gel overlay protein-protein interactions using the split-ubiquitin** 206 **membrane-based yeast two-hybrid analysis**

207 The split-ubiquitin membrane-based yeast two-hybrid (MbY2H) system was used to  
208 validate the gel overlay interactions between the six candidate TIPs and TSWV glycoprotein  
209  $G_N$ . The presence of a transmembrane domain near the C-terminus of TSWV  $G_N$  makes the  
210 MbY2H system the best choice for validation of TSWV  $G_N$  interactions with the candidate  
211 TIPs. The interaction between  $G_N$  and endoCP- $G_N$  was consistent and strong based on the  
212 number of colonies growing on QDO, *i.e.*, - more than 1,000 colonies on all QDO plates for  
213 all three replicates (Fig 6A), and this interaction was confirmed by  $\beta$ -galactosidase assay  
214 (Table S1). We detected a consistent but weak interaction (average of 15 colonies) between  
215  $G_N$  and cyclophilin, and seven of nine colonies tested by  $\beta$ -galactosidase assay were positive.  
216 The remaining four TIPs showed no interaction with  $G_N$  using MbY2H. Contrary to the  
217 MbY2H results,  $G_N$  was determined to interact with enolase and endoCP-V in BiFC  
218 experiments. The steric constraints imposed by the position (C- or N-terminus) of the reporter

219 in the MbY2H (Ubiquitin half) and BiFC (YFP half) systems in yeast versus plants cells,  
220 respectively, may explain the contrasting interactions observed in these assays.

### 221 **The non-conserved region of endoCP-G<sub>N</sub> binds TSWV G<sub>N</sub>**

222 Given the role of G<sub>N</sub> as the viral attachment protein in the larval thrips midgut epithelium  
223 (7, 10) and the confirmed direct interaction between endoCP-G<sub>N</sub> and TSWV G<sub>N</sub>, there was  
224 interest in broadly identifying the amino acid region in the endoCP-G<sub>N</sub> sequence that binds  
225 G<sub>N</sub>. We hypothesized that the non-conserved region of endoCP-G<sub>N</sub> (N-terminal region up to  
226 176 aa or 189 aa) and not the CHB4 motif might play an important role in the interaction with  
227 TSWV G<sub>N</sub>. Using the MbY2H system, it was determined that the non-conserved region of the  
228 endoCP-G<sub>N</sub> sequence had as strong of an interaction with TSWV G<sub>N</sub> as the complete  
229 endoCP-G<sub>N</sub> sequence (Fig 6B and Table S1) - more than 500 colonies on each QDO plate for  
230 each experimental replicate – while the predicted CHB4 motif alone (amino acid positions  
231 190-284) or CHB4 plus few amino acids upstream (position 177-284) did not show an  
232 interaction. The non-conserved endoCP-G<sub>N</sub> sequence region was determined to have no  
233 significant matches to sequences in NCBI non-redundant nucleotide and protein databases.

234

### 235 **Cyclophilin and endoCP-G<sub>N</sub> co-localized with TSWV G<sub>N</sub> in insect cells**

236 To further explore the interactions between TSWV G<sub>N</sub> and the two robust thrips  
237 interacting proteins, cyclophilin and endoCP-G<sub>N</sub>, we co-expressed the proteins as fusions  
238 with GFP or RFP in insect cells. The fusion proteins cyclophilin-RFP and endoCP-G<sub>N</sub>-RFP  
239 and TSWV G<sub>N</sub>-GFP were expressed individually and together in Sf9 cells. When fusion  
240 proteins cyclophilin-RFP and endoCP-G<sub>N</sub>-RFP were individually expressed in Sf9 cells, they  
241 were localized within the entire cytoplasm (Fig. 7). Similarly, the fusion protein TSWV-G<sub>N</sub>-  
242 GFP was also expressed in the cytoplasm, but specifically localized at structures that may be  
243 ER and/or Golgi, consistent with previous work localizing G<sub>N</sub> to these organelles in animal

244 cells (20). When cyclophilin-RFP and TSWV-G<sub>N</sub>-GFP or endoCP-G<sub>N</sub>-RFP and TSWV-G<sub>N</sub>-  
245 GFP were co-expressed in Sf9 cells, they co-localized within small punctate structures, which  
246 was different from their original localization (Fig. 7). However, the controls of co-expressed  
247 RFP and GFP (co-transfection of pHRW and pHGW) were distributed throughout the  
248 cytoplasm, and the localization of cyclophilin-RFP, endoCP-G<sub>N</sub>-RFP and TSWV G<sub>N</sub>-GFP  
249 did not change with the presence of GFP or RFP (Fig. S4). The controls of co-expressed RFP  
250 and GFP (co-transfection of pHRW and pHGW) were distributed throughout the cytoplasm  
251 in single and double transfections (Fig. 7). Although these unknown co-localization sites need  
252 to be further characterized, these co-localization results strongly supports the validity of *in*  
253 *vivo* interactions of cyclophilin and endoCP-G<sub>N</sub> with TSWV-G<sub>N</sub>.

254

## 255 **Discussion**

256 With the creation of transcriptome sequence resources for *F. occidentalis* and improved  
257 proteomics technologies, we have identified the first thrips proteins that bind directly to the  
258 TSWV attachment protein, G<sub>N</sub>. With particular relevance to viral attachment to and  
259 internalization in epithelia, two TIPs (endocuticle structural glycoprotein, endoCP-G<sub>N</sub> and  
260 cyclophilin) were confirmed to interact directly with G<sub>N</sub> and were abundant in midgut and  
261 salivary gland tissues (21). These data may be the first indication of a protein(s) that serves  
262 ‘receptor-like’ roles in transmission biology of the tospoviruses. We narrowed down the G<sub>N</sub>-  
263 binding region to the amino terminal region of endoCP-G<sub>N</sub> excluding the conserved CHB4  
264 domain, setting the stage for future work to decipher the essential amino acids within the non-  
265 conserved region necessary to establish the interaction. Three of the TIPs (mATPase,  
266 endoCP-V, and enolase) were validated to interact with G<sub>N</sub> in BiFC assays, but not in  
267 MbY2H assays. With regards to other virus activities in host cells, the confirmed affinity of

268  $G_N$  with diverse thrips proteins indicates that these insect proteins may be host factors  
269 involved in steps in the virus infection cycle in the invertebrate host such as viral replication  
270 and/or virion maturation previously observed in both the animal (22, 23) and plant hosts (24,  
271 25). Technical limitations preclude functional analysis of the TIPs in acquisition of virus by  
272 larval thrips. Knockdown (RNA interference) and knockout (genome editing) methods have  
273 not been developed for larval thrips, even though RNA interference methods have been  
274 developed to effectively knockdown genes in the much larger adult female thrips by delivery  
275 of dsRNA directly into the hemocoel (26). Using currently available methods, larval thrips do  
276 not survive the dsRNA-injection process, and even if successful, knockdown would be  
277 delayed thus missing the narrow window of virus acquisition during the early larval  
278 development.

279 The most enriched thrips proteins in the initial screen for those bound to virions or  $G_N$   
280 (Table 1 and 2, 72%) were cuticular proteins. Cuticular proteins are well characterized as  
281 major components of insect hard and soft cuticles (27, 28). Soft cuticles have been  
282 documented to line the insect foregut and hindgut (29, 30), and a transmission electron  
283 microscopy study documented cuticle lining of the accessory and primary salivary gland (SG)  
284 ducts of *F. occidentalis* (31). *In silico* sequence analysis of the three cuticular TIPs (CP-V,  
285 endoCP-V, endoCP- $G_N$ ) revealed conserved CHB4 domains (R&R) suggesting their binding  
286 affinity to chitin (heteropolymer of N-acetyl- $\beta$ -D-glucosamine and glucosamine), also a  
287 major component of cuticles and peritrophic membranes (PM) lining the midgut epithelium  
288 of most insects (32). Hemipteran and thysanopteran midguts lack PMs, and are instead lined  
289 with perimicrovillar membranes (PMM) (33, 34) - these structures have been reported to  
290 contain lipoproteins, glycoproteins and carbohydrates (35, 36) and more recently, one study  
291 documented the occurrence and importance of chitin in the PMM of *Rhodnius prolixus*  
292 (kissing bug) midguts, marking the first hemipteran midgut reported to contain chitin (37).

293 Since all three cuticular TIPs were highly expressed in the midgut and SGs of larval *F.*  
294 *occidentalis* in the present study, we hypothesize that chitin or chitin-like structures may  
295 impregnate the thrips PMM and SG-linings, forming a matrix with endoCPs - however, this  
296 remains to be empirically determined. Alternatively, the thrips TIPs annotated as cuticle  
297 proteins with predicted chitin-binding domains may have yet-undescribed functions in insect  
298 biology.

299 Cuticular proteins are emerging as important virus interactors and responders in diverse  
300 vector-borne plant virus systems. A CP of the hemipteran vector, *Laodelphax striatellus*, was  
301 found to interact with the nucleocapsid protein (pc3) of *Rice stripe virus* (genus *Tenuivirus*,  
302 family *Phenuiviridae*) and was hypothesized to be involved in viral transmission and to  
303 possibly protect the virus from degradation by a host immune response in the hemolymph  
304 (19). Recently, a CP of another hemipteran vector, *Rhopalosiphum padi*, was identified to  
305 interact with *Barley yellow dwarf virus-GPV* (genus *Luteovirus*, family *Luteoviridae*)  
306 readthrough protein, and the gene transcript of this particular CP was differentially expressed  
307 in viruliferous compared to virus-free aphids (38). At the transcript level, thrips cuticular  
308 proteins of different types - including the thrips CPRs used in the present study to  
309 phylogenetically place the three cuticular TIPs - were identified to be downregulated in  
310 TSWV-infected first instar larvae (18). Although the three cuticular TIPs identified in the  
311 present study were not reported in the previous study to be differentially-responsive to virus,  
312 both implicate cuticle-associated proteins during the early infection events of TSWV in the  
313 thrips vector.

314 Cyclophilins, also known as peptidyl-prolyl cis-trans isomerases, are ubiquitous proteins  
315 involved in multiple biological processes, including protein folding and trafficking, cell  
316 signaling, and immune responses (39). They have also been shown to promote or prevent  
317 virus infection (40, 41), for example, cyclophilin A was found to bind to viral RNA to inhibit

318 replication of *Tomato bushy stunt virus* (genus *Tombusvirus*, family *Tombusviridae*) in plant  
319 leaf cells (42), while cyclophilins of the aphid vector *Schizaphis graminum* have been shown  
320 to play an important role in *Cereal yellow dwarf virus* (genus *Polerovirus*, family  
321 *Luteoviridae*) transmission (43). Interactions between the thrips cyclophilin TIP (with G<sub>N</sub>)  
322 documented in the present study may affect similar virus processes, such as virus replication  
323 and maturation, or thrips transmission and vector competence (43, 44). The same cyclophilin  
324 was determined to be down-regulated in *F. occidentalis* first instar larvae during TSWV  
325 infection (45), adding to the body of evidence that viruses modulate expression of  
326 cyclophilins (46-51). The cyclophilin interaction with G<sub>N</sub> was consistent but weak and this  
327 may be the reason that it was not observed in the BiFC experiments. Alternative explanations  
328 for the discrepancy in the cyclophilin-G<sub>N</sub> interaction include: the interaction does not occur in  
329 plant cells or that the weak interaction was not strong enough to fluoresce over the  
330 background to detect an *in planta* interaction. Others have proposed that negative strand virus  
331 matrix proteins – structural proteins that package viral RNA - evolved from cyclophilins (52);  
332 however, bunyaviruses do not encode a matrix protein. One hypothesis for the direct  
333 interaction between the cyclophilin with G<sub>N</sub> may be to facilitate RNP packing into the virus  
334 particle, perhaps serving as a surrogate matrix protein for TSWV.

335 Like cyclophilins, enolases of diverse hosts have been identified as both responsive to  
336 and interactive partners with viruses. In general, enolases are essential metalloenzymes that  
337 catalyze the conversion of 2-phosphoglycerate (2-PGE) to phosphoenolpyruvate (PEP) in the  
338 glycolytic pathway for energy metabolism (53). Some are matrix metalloproteases known to  
339 cleave cell surface receptors, modulate cytokine or chemokine activities, or release apoptotic  
340 ligands by degrading all types of extracellular matrix proteins, such as collagen, elastin,  
341 fibronectin, laminin, gelatin, and fibrin (54). The enolase TIP identified in the present study  
342 was previously reported to be up-regulated in L1 bodies infected with TSWV (45), as was the

343 case for enolase in response to RSV in bodies of the planthopper vector, *L. striatellus* (55). In  
344 the case of flaviviruses, *Aedes aegypti* enolase was shown to directly interact with purified  
345 virus and recombinant envelope GP of dengue virus (56) and West Nile virus envelope  
346 protein (57). The localization of this enolase in brush border membrane vesicles of this  
347 mosquito species (58) strengthens the case for a proposed receptor role in virus entry into  
348 vector mosquito midguts. Other insect-virus studies have proposed a role for enolase in  
349 antiviral defense (54) and tracheal basal laminal remodeling aiding in virus escape from the  
350 gut (59). If remodeling of the midgut basal lamina via enolase interactions occurs in TSWV-  
351 infected larval thrips, that could be one hypothesis supporting dissemination of TSWV from  
352 the larval midgut into the principal SGs (15).

353 The other TIP known to play a role in energy production is mitochondrial ATP synthase  
354  $\alpha$  subunit. The multi-subunit enzyme mATPase is responsible for generating the majority of  
355 cellular ATP required by eukaryotes to meet their energy needs. As with the other non-  
356 cuticle TIPs, mATPase  $\alpha$  subunit was previously identified to be differentially-abundant (up-  
357 regulated) under TSWV infection (45), as was the case for RSV-infected *L. striatellus* vector  
358 planthoppers (55). Mitochondria have also been previously implicated in virus-host biology.  
359 For example, *African swine fever virus* (genus *Asfivirus*, family *Asfarviridae*) has been shown  
360 to induce migration of mitochondria to the periphery of viral factories (60), possibly  
361 suggesting that mitochondria supply energy for viral morphogenetic processes. The finding  
362 that two TIPs in the present study have ontologies in energy production and metabolism  
363 suggests that perturbation or direct interactions with these host proteins may be required for  
364 the successful infection of *F. occidentalis* by TSWV.

365 The discovery of six TIPs is a significant step forward for understanding thrips  
366 interactions with tospoviruses. The first evidence of TSWV protein-thrips protein interactions  
367 was presented 20 years ago (61) and the proteins described herein are the first thrips proteins

368 documented to interact directly with the viral glycoprotein, G<sub>N</sub>, involved in virus attachment  
369 to the midgut epithelial cells of the insect vector. In other eukaryotes, the six interacting  
370 proteins have biological functions that point to their putative roles in facilitating the virus  
371 infection/replication cycle by acting as a receptor or other essential step in the virus life cycle  
372 and/or host-response via a defense mechanism. The virus-host systems that have defined  
373 functions for analogous TIPs include plant viruses, arboviruses, and animal/human viruses,  
374 and the findings described here provide a framework for further exploration and testing of  
375 new hypotheses regarding their roles in TSWV-thrips interactions.

## 376 **Materials and methods**

### 377 **Insect rearing and plant and virus maintenance**

378 The *F. occidentalis* colony was established from insects collected on the island of Oahu,  
379 HI, and was maintained on green beans (*Phaseolus vulgaris*) at 22°C (± 2°C) under laboratory  
380 conditions as previously described (62). Thrips were age-synchronized based on their  
381 developmental stages. For the localization and bimolecular fluorescence complementation  
382 (BiFC) experiments, wildtype and transgenic *Nicotiana benthamiana* expressing CFP:H2B or  
383 RFP:ER (63) were grown in a growth chamber at 25°C with a 14-hour light at 300 μM  
384 intensity and 10-hour dark cycle. TSWV (isolate TSWV-MT2) was maintained by both  
385 mechanical inoculation and thrips transmission using *Datura stramonium* and *Emilia*  
386 *sonchifolia*, respectively (12). To avoid generation of a virus isolate with an insect  
387 transmission deficiency, the virus was mechanically passaged only once. The single-pass  
388 mechanically-inoculated symptomatic *D. stramonium* leaves were used for insect acquisition  
389 of TSWV. Briefly, synchronized *F. occidentalis* first instar larvae (0-17-hour old) were  
390 collected and allowed an acquisition access period (AAP) on *D. stramonium* for 24 hours.  
391 After acquisition, *D. stramonium* leaves were removed and these larvae were maintained on



392 green beans until they developed to adults. Viruliferous adults were transferred onto clean *E.*  
393 *sonchifolia* for two days. After inoculation, thrips and inoculated *E. sonchifolia* plants were  
394 treated with commercial pest strips for two hours before the plants were moved to the  
395 greenhouse for TSWV symptom development. The thrips-transmitted, TSWV symptomatic  
396 *E. sonchifolia* leaves were only used for mechanical inoculation.

### 397 **TSWV purification**

398 Mechanically inoculated *D. stramonium* leaves were used for TSWV purification via  
399 differential centrifugation and a sucrose gradient. Symptomatic leaves were homogenized  
400 in extraction buffer (0.033 M KH<sub>2</sub>PO<sub>4</sub>, 0.067 M K<sub>2</sub>HPO<sub>4</sub>, and 0.01 M Na<sub>2</sub>SO<sub>3</sub>) in a 1:3  
401 ratio of leaf tissue to buffer. The homogenate was then filtered through four layers of  
402 cheesecloth, and the flow through was centrifuged at 7,000 rpm (7,445 g) for 15 min using  
403 the Sorvall SLA 1500 rotor. To remove the cell debris, the pellet was resuspended in 65  
404 mL 0.01 M Na<sub>2</sub>SO<sub>3</sub> and was centrifuged again at 8,500 rpm (8,643 g) for 20 min using the  
405 Sorvall SS34 rotor. The supernatant that contained the virions was centrifuged for 33 min  
406 at 29,300 rpm (88205 g) using the 70 Ti rotor, and the pellet was resuspended in 15 mL  
407 0.01 M Na<sub>2</sub>SO<sub>3</sub> followed by another centrifugation at 9,000 rpm (9,690 g) for 15 min using  
408 the Sorvall SS34 rotor. The centrifugation series was repeated one additional time. The  
409 pellet was resuspended and loaded on a sucrose gradient (10 to 40% sucrose), which was  
410 centrifuged for 35 min at 21,000 rpm (79,379 g) using the SW28 rotor. The virion band  
411 was collected and centrifuged for 1 hour at 29,300 rpm (88,205 g) using the 70 Ti rotor.  
412 The pellet was resuspended in 100 to 200 µl of 0.01 M Na<sub>2</sub>SO<sub>3</sub>. All centrifugation steps  
413 were performed at 4°C to prevent virion degradation. The purified virus was quantified  
414 using the bicinchoninic acid (BCA) protein assay kit (ThermoFisher Scientific, Waltham,  
415 MA, USA) following the manufacturer's instructions.

416 ***F. occidentalis* L1 total protein extraction, quantification and two-dimensional (2-D)**  
417 **electrophoresis**

418 Total proteins from age-synchronized healthy larval thrips (0-17-hour old) were  
419 extracted using the trichloroacetic acid-acetone (TCA-A) method (64, 65). Briefly, whole  
420 insects were ground using liquid nitrogen, and were dissolved in 500  $\mu$ l TCA-A extraction  
421 buffer (10% of TCA in acetone containing 2%  $\beta$ -mercaptoethanol). This mixture was  
422 incubated at -20°C overnight and centrifuged at 5,000 g, 4°C for 30 min. After 3 washes with  
423 ice-cold acetone then air-drying, the pellet was resuspended in 200  $\mu$ l General-Purpose  
424 Rehydration/Sample buffer (Bio-Rad Laboratories, Hercules, CA, USA). The suspension was  
425 centrifuged at 12,000 g for 5 min and the protein supernatant was quantified using the BCA  
426 protein assay kit (ThermoFisher Scientific) following manufacturer's instructions. For each  
427 gel, 150  $\mu$ g of total protein extract was applied to an 11-cm IPG strip (pH 3–10) for  
428 isoelectric focusing (IEF). The IEF, IPG strip equilibration and second dimension separation  
429 of proteins were performed under the same conditions described by Badillo-Vargas et al (45).

430 **Overlay assays**

431 To identify thrips proteins that bind to TSWV virions and recombinant glycoprotein G<sub>N</sub>,  
432 we conducted gel overlay assays. For the purified virion overlays, the experiment was  
433 performed four times (biological replications); and for the G<sub>N</sub> overlay, the experiment was  
434 performed twice. For probing the protein-protein interactions, each unstained 2-D gel was  
435 electro-transferred onto Hybond-C Extra nitrocellulose membrane (Amersham Biosciences,  
436 Little Chalfont, UK) overnight at 30 V (4°C) in protein transfer buffer (48 mM Tris, 39 mM  
437 glycine, 20% methanol, and 0.037% SDS). Then, the membrane was incubated with blocking  
438 buffer (PBST containing 0.05% Tween 20 and 5% dry milk) for 1h at room temperature on a  
439 rocker with a gentle rotating motion. Three different antigens were used to probe the thrips  
440 protein membranes: purified TSWV virions, recombinant glycoprotein G<sub>N</sub> (*E. coli*

441 expressed), and virus-free plant extract from a mock virus purification (negative control). An  
442 additional negative control blot (no overlay) treated with antibodies alone was included in  
443 each overlay replicate. For the virus and G<sub>N</sub> treatments, 25 µg/mL and 3.5 µg/mL of purified  
444 TSWV virions and recombinant G<sub>N</sub> glycoprotein, respectively, were incubated with  
445 membranes in blocking buffer at 4°C overnight with gentle rotating motion. Membranes were  
446 washed three times using PBST and were incubated with polyclonal rabbit anti-TSWV G<sub>N</sub>  
447 antiserum at 1:2,000 dilution in blocking buffer for 2 hours at room temperature (9, 21).  
448 After washing with PBST, membranes were incubated with HRP-conjugated goat-anti rabbit  
449 antiserum at 1:5,000 dilution in blocking buffer for 1 hour at room temperature. The ECL  
450 detection system (Amersham Biosciences) was used for protein visualization following the  
451 manufacturer's instructions. The protein spots that were consistently observed on the  
452 membranes were first compared with those proteins spots that interacted with antibody-only  
453 blots (Fig 1A and Fig 2A) and virus-free plant extract blots, and then they were pinpointed  
454 on the corresponding Coomassie Brilliant Blue G-250-stained 2-D gels for spot picking.

#### 455 **Identification of TIPs**

456 Protein spots that were consistently identified in the 2-D gel overlays were selected and  
457 manually picked for analysis. The picked proteins were processed and subjected to ESI mass  
458 spectrometry as previously described (21). Protein spots (peptides) that had Mascot scores  
459 (Mascot v2.2) with significant matches ( $P \leq 0.05$ ) to translated *de novo*-assembled contigs  
460 (all six frames) derived from mixed stages of *F. occidentalis* ("Fo Seq" 454-Sanger hybrid)  
461 (45) were identified and NCBI Blastx was performed on the contigs to provisionally annotate  
462 ( $E < 10^{-10}$ ) the protein and to predict conserved motifs using the contig as the query and the  
463 NCBI non-redundant protein database as the subject.

464 A second round of TIP candidate selection was conducted for stringency in moving  
465 forward to cloning and confirmation of interactions. A contig sequence was retained if it

466 contained a complete predicted ORF (*i. e.*, presence of both start and stop codons predicted  
467 with Expasy, Translate Tool, <http://web.expasy.org/translate/>) and had at least 10% coverage  
468 by a matching peptide(s) identified for a spot as predicted by Mascot. *i. e.*, removal of  
469 proteins identified by a single peptide with less than 10% coverage to a *Fo* Seq contig and/or  
470 contigs with incomplete ORFs (lacking predicted stop codon). The translated ORFs were  
471 queried against the NCBI non-redundant protein database (Blastp), and CCTOP software  
472 (<http://cctop.enzim.ttk.mta.hu>) (66) and SignalP 4.1 Server  
473 (<http://www.cbs.dtu.dk/services/SignalP/>) (67) were used to predict the presence of  
474 transmembrane domains and signal peptides, respectively. Prosite (<http://prosite.expasy.org/>)  
475 was used to analyze putative post-translational modifications that may have affected  
476 electrophoretic mobility of identical proteins in the overlay assays, *i. e.*, same peptide  
477 sequence or *Fo* Seq contig match identified for more than one protein spot.

478

#### 479 **Classification and phylogenetic analysis of the three confirmed cuticular TIPs**

480 Given the apparent enrichment of putative cuticular proteins (CP) identified in the  
481 overlay assays and the subsequent confirmation of three of those TIPs (CP-V, endoCP-G<sub>N</sub>,  
482 endoCP-V), it was of interest to perform a second layer of protein annotations. The ORFs  
483 (amino acid sequence) of the three confirmed CP TIPs, 19 exemplar insect orthologous  
484 sequences obtained from NCBI GenBank, and a significant collection of structural CP  
485 transcripts previously reported to be differentially-expressed in TSWV-infected larval thrips  
486 of *F. occidentalis* (18) were subjected to two complementary arthropod CP prediction tools.  
487 CutProtFam-Pred (<http://aias.biol.uoa.gr/CutProtFam-Pred/home.php>) (68) was used to  
488 classify each amino acid sequence by CP family – there are 12 described families for  
489 arthropods, each distinguished by conserved sequence motifs shared by members (28) – and  
490 CuticleDB (<http://bioinformatics.biol.uoa.gr/cuticleDB>) (69) was used to distinguish what

491 was found to be two enriched, chitin-binding CP families in our dataset: CPR-RR1 and CPR-  
492 RR2, *i. e.*, R&R Consensus motif (17). The sequences flanking the RR1 and RR2 predicted  
493 chitin-binding domains were so divergent between the thrips CPs and across the entire set of  
494 CPs (thrips and other insects) that alignments using full-length ORFs were ambiguous and  
495 uninformative, thus illustrating the utility of the R&R Consensus for inferring evolutionary  
496 history of CP proteins. The flanking sequences were trimmed manually, and the R&R  
497 consensus sequences (RR1 and RR2) were aligned with MEGA7 (70) using ClustalW.  
498 Phylogenetic analyses were performed in MEGA7 using the Neighbor-Joining (NJ) method  
499 and the best substitution models determined for the data - Dayhoff matrix-based (71) or Jones  
500 Taylor Thorton (JTT) (72) methods for amino acid substitutions with Gamma distribution -  
501 to model the variation among sites. Bootstrap consensus trees (500 replicates) were generated  
502 by the NJ algorithm with pairwise deletion for handling gaps. The analysis involved 46  
503 sequences and there were 95 amino acid positions in the final dataset.

#### 504 **Cloning of candidate TIPs and TSWV genes**

505 For generation of full-length clones of TIPs that were used in various protein-protein  
506 assays, total RNA was extracted from L1 thrips (0-17-hour old) using 1 mL Trizol Reagent  
507 (ThermoFisher Scientific), then 200  $\mu$ l chloroform and was precipitated with 500  $\mu$ l  
508 isopropanol. The RNA pellet was dissolved in nuclease-free water, and 1 $\mu$ g total RNA was  
509 used for cDNA synthesis using the Verso cDNA Synthesis kit (ThermoFisher Scientific).  
510 The PCR was performed to amplify six identified TIP ORFs using high fidelity polymerase,  
511 FailSafe (Epicentre, Madison, WI, USA). The designed primers used are listed in Table S2.  
512 Amplicons were cloned into pENTR-D/TOPO (ThermoFisher Scientific).

513 TSWV genes were also cloned to pENTR-D/TOPO, then recombined to different vectors  
514 using Gateway cloning techniques. Coding sequences of different glycoprotein forms  
515 (soluble ( $G_N$ -S) and insoluble ( $G_N$ )) were amplified from pGF7 (73). Primers used for PCR

516 were listed in Table S2.

### 517 **Polyclonal antisera against TIPs**

518 To generate antibodies to the TIPs, the protein sequence was analyzed for multiple  
519 features such as antigenicity and hydrophobicity by the antibody manufacturer (GenScript,  
520 Piscataway, NJ), using the OptimumAntigen™ Design Tool  
521 (<https://www.genscript.com/antigen-design.html>). For each TIP, a 14 amino acid peptide was  
522 selected based on these predictions and by sequence alignments to other predicted protein  
523 sequences in GenBank. Due to the conserved CHB4 domain in endoCP-G<sub>N</sub>, endoCP-V, and  
524 CP-V, the polyclonal antibodies against these three TIPs were generated using their non-  
525 conserved region. The peptides were synthesized, and all antisera were produced using mice  
526 (GenScript, Piscataway, NJ, United States). The peptide sequences for each TIP that were  
527 used for the antibody generation were: cyclophilin, LESFGSHDGKTSKK; enolase,  
528 ELRDNDKSQYHGKS; CP-V, TDSGQYRKEKRLED; endoCP-G<sub>N</sub>, STKVNPQSFSRSSV;  
529 endoCP-V, VNPDGSFQYSYQTG; and mATPase, GHLDKLDPAKITDF.

530

### 531 **Validation of antisera specificity against each TIP (peptide) using dot blot**

532 Peptide antibodies to the six TIPs were generated by GenScript using their standardized  
533 work flow. For each TIP, the amino acids of highest antigenic potential were identified,  
534 peptides were synthesized, antibodies were generated by injection in mice, and antibodies  
535 were tested for reactivity and specificity using dot-blot assays. The peptides that were used to  
536 generate each antibody were diluted to 100 µg/mL using 1×PBS (pH=7.2), with the exception  
537 of the CP-V peptide that was diluted to 2.5 mg/mL (briefly explain why – lower sensitivity?).  
538 Two ul of each diluted peptide was spotted onto the same nitrocellulose membrane strip  
539 along with the controls of PBS and pre-immune serum (500,000 × dilution). A total of 6  
540 membrane strips, one for each TIP-peptide antibody, were loaded with the same peptide

541 samples and controls. After membrane strips dried, each strip was incubated with blocking  
542 buffer (5% non-fat milk in TBS-T), followed by incubation with the six different primary  
543 antibodies (0.5  $\mu\text{g}/\text{mL}$ , produced by GenScript), respectively. After three washes with TBS-T  
544 ( $3\times 10$  min), all membrane strips were incubated with secondary antibody, goat anti-mouse  
545 IgG (H+L)-HRP conjugate (1:5,000 dilution, Bio-Rad Laboratories). After three washes with  
546 TBS-T, the SuperSignal™ West Dura Extended Duration Substrate (ThermoFisher Scientific)  
547 was added onto individual membrane strips. Each membrane strip was developed separately  
548 for 5 to 10 min, however, the membrane strip that was incubated with the CP-V peptide  
549 antibody was developed for 40 min. Then a picture was taken using iBright Imaging system  
550 (CL1000, ThermoFisher Scientific). The blocking, primary and secondary antibody  
551 incubation steps were incubated for 1 hour at room temperature, and the strip probed with  
552 CP-V peptide antibody was incubated for 2 hours at room temperature. The entire experiment  
553 was performed three times.

#### 554 **Immunolabeling thrips guts, Malpighian tubules, and salivary glands**

555 To determine the location of TIPs expression in the most efficient thrips stage that  
556 acquires TSWV (L1), we used the TIPs antibodies in immunolocalization experiments.  
557 Treatments in the experiments included peptide antibodies to the TIPs and background  
558 controls of dissected insects incubated with i) only secondary antibody and ii) insects treated  
559 with pre-immune serum and secondary antibody. Newly emerged larvae (0-17-hour old)  
560 were collected from green beans and were then fed on 7% sucrose solution for 3 hours to  
561 clean their guts from plant tissues. The larvae were dissected on glass slides using cold  
562 phosphate saline (PBS) buffer and Teflon coated razor blades. The dissected thrips were  
563 transferred into 2-cm-diam., flat-bottomed watch glasses (U.S. Bureau of Plant Industry, BPI  
564 dishes) and the tissues were fixed for 2 hours using 4% paraformaldehyde solution in 50 mM  
565 sodium phosphate buffer (pH 7.0). The tissues were washed using PBS buffer after fixation

566 and were incubated with PBS buffer including 1% Triton X-100 overnight. The overnight  
567 permeabilized tissues were then washed before incubation in blocking buffer which included  
568 PBS, 0.1% Triton X-100 and 10% normal goat serum (NGS) for 1 hour. After removing the  
569 blocking buffer, the dissected thrips were incubated with primary antibody, 100 µg/mL mice-  
570 generated antisera against each individual TIP (GenScript) that was diluted in antibody buffer  
571 (0.1% Triton X-100 and 1% NGS). After washing, 10 µg/mL secondary antibody, goat anti-  
572 mouse antibody conjugated with Alexa Fluor 488 (ThermoFisher Scientific) was used to  
573 incubate the dissected thrips organs. Incubation was performed at room temperature for 2.5  
574 hours, 1x PBS buffer was used for washing and every wash step included three rinses, and  
575 the secondary antibody incubation was protected from light by covering the samples with  
576 aluminum foil. After removing antibodies and washing, dissected thrips were incubated for 2  
577 hours with Phalloidin-Alexa 594 conjugated (ThermoFisher Scientific) in 1x PBS with a  
578 concentration of 4 units/mL for actin staining. After washing, the tissues were transferred  
579 onto glass slides, and SlowFade™ Diamond Antifade Mountant with DAPI (ThermoFisher  
580 Scientific) was added onto tissues to stain the nuclei. The cover slips were slowly placed on  
581 tissues to avoid bubbles, then sealed with transparent nail polish at the edges. After blocking,  
582 the dissected thrips tissues that were only incubated with secondary antibody (without adding  
583 primary antibody) and the tissues incubated with each pre-immune mouse antiserum  
584 (GenScript) were used as negative controls, respectively. All the experiments were  
585 performed twice.

586 Inherent with very small tissues (< 1 mm body size), there were common losses or  
587 damaged tissues during the dissection process and staining procedures; so only the number of  
588 visibly intact tissue that made it through to microscopic observation were used for data  
589 collection and this number varied for each type of tissue (Table S4). The auto-fluorescent  
590 background from thrips tissues incubated with each pre-immune antiserum and secondary



591 antibodies was slightly higher than the thrips tissues incubated with PBS buffer and  
592 secondary antibodies (negative control) (data not shown), therefore, the confocal laser  
593 settings (power and percent gain) were adjusted to remove any background fluorescence  
594 observed for these treatments.

### 595 **Split-ubiquitin membrane-based yeast two-hybrid (MbY2H)**

596 The MbY2H system was used to validate TSWV G<sub>N</sub>-TIPs interactions identified in the  
597 gel overlay assays. The MbY2H system enables validation of interactions for soluble and  
598 integral membrane proteins. TSWV G<sub>N</sub> coding sequence were cloned into the MbYTH vector  
599 pBT3-SUC, and the six TIP ORFs were cloned to vector pPR3N using the SfiI restriction site  
600 (Dualsystems Biotech, Schlieren, Switzerland). To identify the region of endoCP-G<sub>N</sub> that  
601 binds to TSWV G<sub>N</sub> using MbY2H, the amino acid sequence of endoCP-G<sub>N</sub> (284aa) was used  
602 to search against the NCBI non-redundant protein database using Blastp. The conserved  
603 CHB4 domain was located at the C-terminus of endoCP-G<sub>N</sub> (amino acid 190-246).  
604 Therefore, the possible interacting domains, the non-conserved region of endoCP-G<sub>N</sub> (1-  
605 189aa) and the conserved CHB4 domain (190-274aa), were individually cloned into pPR3N  
606 using the SfiI restriction site. Based on the Blastp results, the homologous sequences from  
607 other insect species encompassed some additional amino acids upstream of the CHB4  
608 domain; therefore, we made an alternative construct that included the conserved CBH4  
609 domain starting from amino acid 177. Hence, the coding sequence of 1-176aa and 177-284aa  
610 of endoCP-G<sub>N</sub> were also cloned to pPR3N using the SfiI restriction site. Primers used for  
611 cloning are listed in Table S3.

612 The MbY2H assays were performed using the manufacturer's instructions with  
613 recombinant plasmids that were confirmed by Sanger sequencing. Yeast (strain NYM51)  
614 competent cells were freshly prepared and recombinant bait plasmids, pBT3-SUC-G<sub>N</sub> were  
615 transformed into yeast cells. Briefly, 1.5 µg of bait plasmids were added into 100 µl of yeast

616 competent cells with 50  $\mu$ g of denatured Yeastmaker Carrier DNA (Takara Bio USA,  
617 Mountain View, CA) and 500  $\mu$ l PEG/LiAc. The mixture was incubated at 30°C for 30 min  
618 with mixing every 10 min. Twenty  $\mu$ l of DMSO was then added into each reaction, and the  
619 cells were incubated at 42°C for 20 min with mixing every 5 min. After centrifugation at  
620 14,000 rpm for 15 sec, the supernatant was removed, and the pellet was resuspended in 1 mL  
621 of YPDA media. The re-suspended cells were incubated at 30°C for 90 min with shaking at  
622 200 rpm. Then, cells were centrifuged at 14,000 rpm for 15 sec, and resuspended in 500  $\mu$ l of  
623 sterile 0.9% (w/v) NaCl, which was then spread and cultured on SD/-Trp dropout media at  
624 30°C until the colonies were visible. Several colonies from the same SD/-Trp plate were  
625 cultured for preparing yeast competent cells. Then each individual recombinant plasmid,  
626 pPR3N-TIP or pPR3N-partial endoCP-G<sub>N</sub> (1.5  $\mu$ g/transformation reaction), was transformed  
627 into yeast competent cells expressing fused Nub-G<sub>N</sub>. The transformants were cultured on  
628 both SD/-Leu/-Trp double dropout (DDO) and SD/-Ade/-His/-Leu/-Trp quadruple dropout  
629 (QDO) media. The positive controls included transformation of pOst1-NubI into the yeast  
630 strain NYM51 that already expressed fused Nub-G<sub>N</sub> or Nub-N, as well as co-transformation  
631 of pTSU2-APP and pNubG-Fe65 into the yeast strain NYM51. Transformation of pPR3N  
632 (empty vector) into the yeast strain NYM51 that already expressed fused Nub-G<sub>N</sub> was used as  
633 the negative control. Interactions between G<sub>N</sub>-Cub and NubI, G<sub>N</sub>-Cub and NubG were used  
634 as positive and negative controls respectively. All transformants were spread and cultured on  
635 both DDO and QDO media and cultured at 30°C in an incubator. The entire experiment was  
636 performed three times.

### 637 **Yeast $\beta$ -galactosidase assay**

638 Expression of the reporter gene *LacZ* and the activity of expressed  $\beta$ -galactosidase in  
639 yeast cells derived from MbY2H was determined by a  $\beta$ -galactosidase assay kit following the  
640 manufacturer's protocol (ThermoFisher Scientific). Each yeast colony was transferred, mixed

641 with 250  $\mu$ l of Y-PER by vortex, and their initial OD<sub>660</sub> value was determined. After adding  
642 250  $\mu$ l 2X  $\beta$ -galactosidase assay buffer to the mixed solution, the reaction was incubated at  
643 37°C until the color change of solution was observed. Two hundred  $\mu$ l of  $\beta$ -galactosidase  
644 assay stop solution was added immediately into color change solution, and the reaction time  
645 was recorded. Cell debris was removed by centrifugation at 13,000  $g$  for 30 seconds.  
646 Supernatant was transferred into cuvettes to measure OD<sub>420</sub> using the blank including 250  $\mu$ l  
647 of Y-PER reagent, 250  $\mu$ l  $\beta$ -galactosidase assay buffer and 200  $\mu$ l  $\beta$ -galactosidase assay stop  
648 solution. The  $\beta$ -galactosidase activity was calculated using the equation from the  
649 manufacturer's protocol.

650 **GFP fusion protein expression and bimolecular fluorescence complementation (BiFC)**  
651 **in *Nicotiana benthamiana***

652 To visualize protein expression and localization in plants, TSWV G<sub>N</sub> (ORFs G<sub>N</sub> and  
653 G<sub>NS</sub>) and TIP ORFs (mATPase, CP-V, endoCP-V, endoCP-G<sub>N</sub>, cyclophilin and enolase)  
654 were expressed as fusions to autofluorescent proteins. They were moved from their entry  
655 clones into pSITE-2NB (GFP fused to the carboxy terminus of the protein of interest) or  
656 pSITE-2CA (GFP fused to the amino terminus of the protein of interest) using Gateway LR  
657 Clonase (74). After validation of plasmids by Sanger sequencing, they were transformed into  
658 *Agrobacterium tumefaciens* strain LBA 4404. The transformed LBA 4404 was grown for two  
659 days at 28°C and re-suspended in 0.1 M MES and 0.1 M MgCl<sub>2</sub> to an OD<sub>600</sub> between 0.6 to 1.  
660 After the addition of 0.1 M acetosyringone, the suspension was incubated at room  
661 temperature for two hours, and then infiltrated in transgenic *N. benthamiana* expressing an  
662 endoplasmic reticulum (ER) marker fused to the red fluorescent protein (m5RFP-HDEL)  
663 (63). Two days after infiltration, leaf tissue was mounted in water on a microscope slide for  
664 detection of GFP by confocal microscopy. Plants were infiltrated a minimum of two separate  
665 occasions with at least two leaves per plant in two different plants. A minimum of fifty cells

666 were visualized in each plant to confirm the localization patterns of the proteins *in planta*.

667 The preliminary localization results and sequence analysis informed the fusion construct  
668 design for BiFC assays. Signal peptides were identified in the amino terminus of G<sub>N</sub>, and  
669 three TIPs (all cuticle proteins) and the signal peptide is required for proper localization and  
670 function of fusion-GFP/YFP proteins in *N. benthamiana* for BiFC assays. Based on the  
671 expression and localization results of GFP fusion proteins, we fused half YFPs (either amino  
672 or carboxy half of YFP) to the carboxy termini of all proteins with N-terminal signal peptides  
673 using BiFC plasmids pSITE-NEN and pSITE-CEN (63). All ORFS were transferred between  
674 plasmids using Gateway LR Clonase II Enzyme Mix (ThermoFisher Scientific). All clones  
675 were transformed into *A. tumefaciens* strain LBA 4404 and confirmed by Sanger sequencing.

676 Each combination of TIPs and TSWV G<sub>N</sub> and G<sub>N</sub>-S was infiltrated into *N. benthamiana*  
677 expressing CFP fused to a nuclear marker, histone 2B, (CFP-H2B) (63), and a minimum of  
678 three independent experiments with two plants and two leaves per plant for each combination  
679 of proteins. For the analysis of interactions, a minimum of 50 cells with similar localization  
680 patterns was required to confirm the interaction and a minimum of two separate images were  
681 captured on each occasion for documentation. GST fusions to YFP halves were utilized as a  
682 non-binding control for each of the TIPs. To be recorded as a positive interaction,  
683 fluorescence of the interacting TSWV protein-TIPs was required to be above that observed  
684 between each TIP and GST.

### 685 **Laser scanning confocal microscopy**

686 Confocal microscopy was used to detect the fluorescent signal produced from TIP antibody  
687 labelling in thrips tissues and BiFC experiments in plants. All images were acquired on a  
688 Zeiss LSM 780 laser scanning confocal microscope using the C-Apochromat 40x/1.2 W Korr  
689 M27 and Plan-Apochromat 20x/0.8 M27 objectives. Image acquisition was conducted on

690 Zen 2 black edition v. 10.0.0 at 1024 x 1024 pixels with a scan rate of 1.58  $\mu$ s per pixel with  
691 pixel average of 4-bit and 16-bit depth. The laser power and percent gain settings for  
692 detection of nuclei and actin as well as the bright field were adjusted accordingly. Laser  
693 power and percent gain settings for detection of TIPs were equal or smaller than their  
694 controls. Z-stacks were taken for localization of TIPs in thrips. Eight (TIPs localization) Z-  
695 stack slides were processed using Maximum intensity projection using Zen 2 black. Zen 2  
696 blue edition lite 2010 v. 2.0.0.0 was used for image conversion to jpeg format.

697

### 698 **Co-localization of TIPs and TSWV G<sub>N</sub> in insect cells**

699 The ORFs of cyclophilin, endoCP-G<sub>N</sub> and TSWV G<sub>N</sub> were cloned into pENTR/D-TOPO  
700 (Thermo Fisher Scientific, Grand Island, NY). TSWV G<sub>N</sub> was amplified by primers ENTR-  
701 endoCP-G<sub>N</sub>F and ENTR-TSWV-G<sub>N</sub>R1353 (Table S2). The cyclophilin and endoCP-G<sub>N</sub>  
702 ENTR clones were recombined into pHWR, and the TSWV G<sub>N</sub> ENTR clone was moved into  
703 pHWG (*Drosophila* gateway collection, DGRC, Bloomington, Indiana). Both pHWR and  
704 pHWG have Hsp70 promotor and gateway cloning cassette, and both RFP and GFP were  
705 expressed at the C-terminus of TIPs or TSWV G<sub>N</sub>.

706 The recombinant expression constructs were confirmed by Sanger sequencing and then  
707 transfected into Sf9 cells. Single- or co-transfections were performed using Cellfectin II  
708 Reagent (ThermoFisher Scientific) following the manufacturer's protocol. Briefly, Sf9 cells  
709 were counted, diluted to  $5 \times 10^5$ , and then 2 ml aliquots were seeded into each well of a 6-well  
710 plate. Eight  $\mu$ L of Cellfectin II reagent and 3 ng of each recombinant plasmid were diluted in  
711 100  $\mu$ L Grace's medium (Thermofisher Scientific), respectively. After vortex-mixing, both  
712 diluted DNA and diluted Cellfectin II reagent were incubated at room temperature for 30 min  
713 and then were combined and incubated for an additional 30 min. Another 800  $\mu$ L of Grace's  
714 medium was added into each DNA-lipid mixture, and the entire 1 mL solution was slowly

715 added onto Sf9 cells. The transfection mix was incubated for 5 hours at 27°C after which the  
716 solution was removed and replaced by 2 mL Sf-900 III medium. Single transfected plasmids  
717 were pHWR-cyclophilin, pHWR-endoCP-G<sub>N</sub> and pHWG-TSWV G<sub>N</sub>; co-transfected  
718 plasmids were pHWR-cyclophilin and pHWG-TSWV G<sub>N</sub>; pHWR-endoCP-G<sub>N</sub> and pHWG-  
719 TSWV G<sub>N</sub>. To rule out non-specific interactions between the proteins of interests (TIPs or G<sub>N</sub>)  
720 and the autofluorescent protein tags, they were co-transfected with unfused RFP or GFP. In  
721 addition, a mock (no DNA) transfection was also included as negative control.

722 After 72 h, Sf9 cells were resuspended and re-seeded in a 24-well glass bottom  
723 Sensoplate (Greiner Bio-One, Monroe, NC) with 1:2 dilution. The cells were stained with  
724 DAPI and then visualized by the Cytation 5 Cell Imaging Multi-Mode Reader with objectives  
725 40x PL FL and 20x PL FL (BioTek, Winooski, VT). Image acquisition was performed with  
726 BioTek Gen 5 Microplate Reader and Imager Software, version 3.04. Images were captured  
727 using default settings. To detect GFP and RFP, the exposure settings (LED  
728 intensity/integration time/camera gain) of mock transfected cells were set up as the baseline  
729 and different treatments were set to no more than the mock settings. Other parameter settings  
730 for detection of nuclei and bright field were adjusted accordingly. The entire experiment was  
731 performed four times.

732

### 733 **Data availability**

734 The GenBank accession numbers for six TIPs are: cyclophilin, MH884760; enolase,  
735 MH884759; cuticular protein: CP-V, MH884758; endoCP-G<sub>N</sub>, MH884757; endoCP-V,  
736 MH884756; mitochondrial ATP synthase  $\alpha$ , MH884761.

737

### 738 **Acknowledgements**

739 We thank Thomas L. German and Ranjit Dasgupta for providing purified G<sub>N</sub>-S for protein

740 overlays. This project was supported by the following grants: USDA-NIFA 2007-35319-  
741 18326 and 2016-67013-27492, USDA-FNRI 6034-22000-039-06S, and National Science  
742 Foundation CAREER Grant IOS-0953786. Ismael E. Badillo-Vargas was partially supported  
743 by the National Institute of Food and Agriculture Predoctoral Fellowship, grant KS602489.

#### 744 **References**

- 745 1. Gubler DJ. 1998. Resurgent vector-borne diseases as a global health problem.  
746 Emerging infectious diseases 4:442-450.
- 747 2. Gubler DJ. 2002. The global emergence/resurgence of arboviral diseases as public  
748 health problems. Arch Med Res 33:330-342.
- 749 3. Beaty BJ, Bishop DH. 1988. Bunyavirus-vector interactions. Virus Res 10:289-301.
- 750 4. Elliott RM. 1997. Emerging viruses: the Bunyaviridae. Mol Med 3:572-577.
- 751 5. Horne KM, Vanlandingham DL. 2014. Bunyavirus-vector interactions. Viruses  
752 6:4373-4397.
- 753 6. Rotenberg D, Jacobson AL, Schneweis DJ, Whitfield AE. 2015. Thrips transmission  
754 of tospoviruses. Curr Opin Virol 15:80-89.
- 755 7. Whitfield AE, Ullman DE, German TL. 2005. Tospovirus-thrips interactions. Annu  
756 Rev Phytopathol 43:459-489.
- 757 8. Parrella G, Gognalons P, Gebre-Selassie K, Vovlas C, Marchoux G. 2003. An update  
758 of the host range of Tomato spotted wilt virus. Journal of Plant Pathology 85:227-264.
- 759 9. Montero-Astua M, Rotenberg D, Leach-Kieffaber A, Schneweis BA, Park S, Park JK,  
760 German TL, Whitfield AE. 2014. Disruption of vector transmission by a plant-  
761 expressed viral glycoprotein. Mol Plant Microbe Interact 27:296-304.
- 762 10. Whitfield AE, Kumar NK, Rotenberg D, Ullman DE, Wyman EA, Zietlow C, Willis  
763 DK, German TL. 2008. A soluble form of the *tomato spotted wilt virus* (TSWV)

764 glycoprotein G<sub>N</sub> (G<sub>N</sub>-S) inhibits transmission of TSWV by *Frankliniella occidentalis*.  
765 Phytopathology 98:45-50.

766 11. Whitfield AE, Ullman DE, German TL. 2004. Expression and characterization of a  
767 soluble form of *tomato spotted wilt virus* glycoprotein G<sub>N</sub>. J Virol 78:13197-13206.

768 12. Ullman DE, German TL, Sherwood JL, Westcot DM, Cantone FA. 1993. Tospovirus  
769 replication in insect vector cells: immunocytochemical evidence that the nonstructural  
770 protein encoded by the S RNA of tomato spotted wilt tospovirus is present in thrips  
771 vector cells. Phytopathology 83:456-463.

772 13. Wijkamp I, van Lent J, Kormelink R, Goldbach R, Peters D. 1993. Multiplication of  
773 tomato spotted wilt virus in its insect vector, *Frankliniella occidentalis*. J Gen Virol  
774 74:341-349.

775 14. Nagata T, Inoue-Nagata AK, Smid HM, Goldbach R, Peters D. 1999. Tissue tropism  
776 related to vector competence of *Frankliniella occidentalis* for tomato spotted wilt  
777 tospovirus. J Gen Virol 80:507-515.

778 15. Ullman DE, Cho JJ, Mau RFL, Westcot DM, Custer DM. 1992. A midgut barrier to  
779 tomato spotted wilt virus acquisition by adult western flower thrips. Phytopathology  
780 82:1333-1342.

781 16. Sin SH, McNulty BC, Kennedy GG, Moyer JW. 2005. Viral genetic determinants for  
782 thrips transmission of Tomato spotted wilt virus. Proc Natl Acad Sci U S A 102:5168-  
783 5173.

784 17. Rebers JE, Riddiford LM. 1988. Structure and expression of a *Manduca sexta* larval  
785 cuticle gene homologous to *Drosophila* cuticle genes. J Mol Biol 203:411-423.

786 18. Schneweis DJ, Whitfield AE, Rotenberg D. 2017. Thrips developmental stage-  
787 specific transcriptome response to tomato spotted wilt virus during the virus infection  
788 cycle in *Frankliniella occidentalis*, the primary vector. Virology 500:226-237.



- 789 19. Liu W, Gray S, Huo Y, Li L, Wei T, Wang X. 2015. Proteomic analysis of interaction  
790 between a plant virus and its vector insect reveals new functions of hemipteran  
791 cuticular protein. *Mol Cell Proteomics* 14:2229-2242.
- 792 20. Snippe M, Smeenk L, Goldbach R, Kormelink R. 2007. The cytoplasmic domain of  
793 tomato spotted wilt virus Gn glycoprotein is required for Golgi localisation and  
794 interaction with Gc. *Virology* 363:272-279.
- 795 21. Montero-Astua M, Ullman DE, Whitfield AE. 2016. Salivary gland morphology,  
796 tissue tropism and the progression of tospovirus infection in *Frankliniella*  
797 *occidentalis*. *Virology* 493:39-51.
- 798 22. Elliott RM, Schmaljohn CS. 2013. Bunyaviridae. In Knipe DM, Howley PM (ed),  
799 *Fields Virology*, 6th ed. Lippincott Williams & Wilkins, Philadelphia, PA.
- 800 23. Wang H, Alminait A, Vaheri A, Plyusnin A. 2010. Interaction between hantaviral  
801 nucleocapsid protein and the cytoplasmic tail of surface glycoprotein Gn. *Virus*  
802 *Research* 151:205-212.
- 803 24. Ribeiro D, Borst JW, Goldbach R, Kormelink R. 2009. Tomato spotted wilt virus  
804 nucleocapsid protein interacts with both viral glycoproteins Gn and Gc *in planta*.  
805 *Virology* 383:121-130.
- 806 25. Richmond KE, Chenault K, Sherwood JL, German TL. 1998. Characterization of the  
807 nucleic acid binding properties of tomato spotted wilt virus nucleocapsid protein.  
808 *Virology* 248:6-11.
- 809 26. Badillo-Vargas IE, Rotenberg D, Schneweis BA, Whitfield AE. 2015. RNA  
810 interference tools for the western flower thrips, *Frankliniella occidentalis*. *J Insect*  
811 *Physiol* 76:36-46.
- 812 27. Andersen SO, Hojrup P, Roepstorff P. 1995. Insect cuticular proteins. *Insect Biochem*  
813 *Mol Biol* 25:153-176.

- 814 28. Willis JH. 2010. Structural cuticular proteins from arthropods: annotation,  
815 nomenclature, and sequence characteristics in the genomics era. *Insect Biochem Mol*  
816 *Biol* 40:189-204.
- 817 29. Chapman RF, Simpson SJ, Douglas AE. 2013. *The Insects: Structure and Function*,  
818 5th ed. Cambridge University Press.
- 819 30. Maddrell SHP, Gardiner BOC. 1980. The permeability of the cuticular lining of the  
820 insect alimentary canal. *The Journal of Experimental Biology* 85:227-237.
- 821 31. Ullman DE, Westcot DM, Hunter WB, Mau RFL. 1989. Internal anatomy and  
822 morphology of *Frankliniella occidentalis* (Pergande) (Thysanoptera: Thripidae) with  
823 special reference to interactions between thrips and tomato spotted wilt virus.  
824 *International Journal of Insect Morphology and Embryology* 18:289-310.
- 825 32. Zhu KY, Merzendorfer H, Zhang W, Zhang J, Muthukrishnan S. 2016. Biosynthesis,  
826 turnover, and functions of chitin in insects. *Annu Rev Entomol* 61:177-196.
- 827 33. Cristofolletti PT, Ribeiro AF, Deraison C, Rahbe Y, Terra WR. 2003. Midgut  
828 adaptation and digestive enzyme distribution in a phloem feeding insect, the pea aphid  
829 *Acyrtosiphon pisum*. *J Insect Physiol* 49:11-24.
- 830 34. Silva CP, Silva JR, Vasconcelos FF, Petretski MD, Damatta RA, Ribeiro AF, Terra  
831 WR. 2004. Occurrence of midgut perimicrovillar membranes in paraneopteran insect  
832 orders with comments on their function and evolutionary significance. *Arthropod*  
833 *Struct Dev* 33:139-148.
- 834 35. Albuquerque-Cunha JM, Gonzalez MS, Garcia ES, Mello CB, Azambuja P, Almeida  
835 JC, de Souza W, Nogueira NF. 2009. Cytochemical characterization of microvillar  
836 and perimicrovillar membranes in the posterior midgut epithelium of *Rhodnius*  
837 *prolixus*. *Arthropod Struct Dev* 38:31-44.
- 838 36. Terra WR, Costa RH, Ferreira C. 2006. Plasma membranes from insect midgut cells.

- 839 An Acad Bras Cienc 78:255-269.
- 840 37. Alvarenga ES, Mansur JF, Justi SA, Figueira-Mansur J, Dos Santos VM, Lopez SG,  
841 Masuda H, Lara FA, Melo AC, Moreira MF. 2016. Chitin is a component of the  
842 *Rhodnius prolixus* midgut. Insect Biochem Mol Biol 69:61-70.
- 843 38. Wang H, Wu K, Liu Y, Wu Y, Wang X. 2015. Integrative proteomics to understand  
844 the transmission mechanism of *Barley yellow dwarf virus-GPV* by its insect vector  
845 *Rhopalosiphum padi*. Sci Rep 5:10971.
- 846 39. Kumari S, Roy S, Singh P, Singla-Pareek SL, Pareek A. 2013. Cyclophilins: proteins  
847 in search of function. Plant Signal Behav 8:e22734.
- 848 40. Liu H, Xue Q, Cao W, Yang F, Ma L, Liu W, Zhang K, Liu X, Zhu Z, Zheng H.  
849 2018. Foot-and-mouth disease virus nonstructural protein 2B interacts with  
850 cyclophilin A, modulating virus replication. FASEB J 32:6706-6723.
- 851 41. von Hahn T, Ciesek S. 2015. Cyclophilin polymorphism and virus infection. Curr  
852 Opin Virol 14:47-49.
- 853 42. Kovalev N, Nagy PD. 2013. Cyclophilin A binds to the viral RNA and replication  
854 proteins, resulting in inhibition of tombusviral replicase assembly. J Virol 87:13330-  
855 13342.
- 856 43. Tamborindeguy C, Bereman MS, DeBlasio S, Igwe D, Smith DM, White F, MacCoss  
857 MJ, Gray SM, Cilia M. 2013. Genomic and proteomic analysis of *Schizaphis*  
858 *graminum* reveals cyclophilin proteins are involved in the transmission of *cereal*  
859 *yellow dwarf virus*. Plos One 8:e71620.
- 860 44. Yang X, Thannhauser TW, Burrows M, Cox-Foster D, Gildow FE, Gray SM. 2008.  
861 Coupling genetics and proteomics to identify aphid proteins associated with vector-  
862 specific transmission of polerovirus (luteoviridae). J Virol 82:291-299.
- 863 45. Badillo-Vargas IE, Rotenberg D, Schneweis DJ, Hiromasa Y, Tomich JM, Whitfield

- 864 AE. 2012. Proteomic analysis of *Frankliniella occidentalis* and differentially  
865 expressed proteins in response to tomato spotted wilt virus infection. *J Virol* 86:8793-  
866 8809.
- 867 46. An P, Wang LH, Hutcheson-Dilks H, Nelson G, Donfield S, Goedert JJ, Rinaldo CR,  
868 Buchbinder S, Kirk GD, O'Brien SJ, Winkler CA. 2007. Regulatory polymorphisms  
869 in the cyclophilin A gene, *PPIA*, accelerate progression to AIDS. *PLoS Pathog* 3:e88.
- 870 47. Bleiber G, May M, Martinez R, Meylan P, Ott J, Beckmann JS, Telenti A. 2005. Use  
871 of a combined ex vivo/in vivo population approach for screening of human genes  
872 involved in the human immunodeficiency virus type 1 life cycle for variants  
873 influencing disease progression. *Journal of Virology* 79:12674-12680.
- 874 48. Chatterji U, Bobardt M, Selvarajah S, Yang F, Tang H, Sakamoto N, Vuagniaux G,  
875 Parkinson T, Gallay P. 2009. The isomerase active site of cyclophilin A is critical for  
876 hepatitis C virus replication. *Journal of Biological Chemistry* 284:16998-17005.
- 877 49. Kaul A, Stauffer S, Berger C, Pertel T, Schmitt J, Kallis S, Zayas M, Lohmann V,  
878 Luban J, Bartenschlager R. 2009. Essential role of cyclophilin A for hepatitis C virus  
879 replication and virus production and possible link to polyprotein cleavage kinetics.  
880 *PLoS Pathog* 5:e1000546.
- 881 50. Rits MAN, van Dort KA, Kootstra NA. 2008. Polymorphisms in the regulatory region  
882 of the Cyclophilin A gene influence the susceptibility for HIV-1 infection. *PLoS One*  
883 3:e3975.
- 884 51. Yang F, Robotham JM, Nelson HB, Irsigler A, Kenworthy R, Tang H. 2008.  
885 Cyclophilin A is an essential cofactor for hepatitis C virus infection and the principal  
886 mediator of cyclosporine resistance in vitro. *Journal of Virology* 82:5269-5278.
- 887 52. Krupovic M, Koonin EV. 2017. Multiple origins of viral capsid proteins from cellular  
888 ancestors. *Proc Natl Acad Sci U S A* 114:E2401-E2410.

- 889 53. Brown JR, Doolittle WF. 1997. Archaea and the prokaryote-to-eukaryote transition.  
890 Microbiology and Molecular Biology Reviews 61:456-502.
- 891 54. Van Lint P, Libert C. 2007. Chemokine and cytokine processing by matrix  
892 metalloproteinases and its effect on leukocyte migration and inflammation. J Leukoc  
893 Biol 82:1375-1381.
- 894 55. Zhang F, Guo H, Zheng H, Zhou T, Zhou Y, Wang S, Fang R, Qian W, Chen X.  
895 2010. Massively parallel pyrosequencing-based transcriptome analyses of small  
896 brown planthopper (*Laodelphax striatellus*), a vector insect transmitting rice stripe  
897 virus (RSV). BMC Genomics 11:303.
- 898 56. Munoz Mde L, Limon-Camacho G, Tovar R, Diaz-Badillo A, Mendoza-Hernandez G,  
899 Black WCt. 2013. Proteomic identification of dengue virus binding proteins in *Aedes*  
900 *aegypti* mosquitoes and *Aedes albopictus* cells. Biomed Res Int 2013:875958.
- 901 57. Colpitts TM, Cox J, Nguyen A, Feitosa F, Krishnan MN, Fikrig E. 2011. Use of a  
902 tandem affinity purification assay to detect interactions between West Nile and  
903 dengue viral proteins and proteins of the mosquito vector. Virology 417:179-187.
- 904 58. Popova-Butler A, Dean DH. 2009. Proteomic analysis of the mosquito *Aedes aegypti*  
905 midgut brush border membrane vesicles. J Insect Physiol 55:264-272.
- 906 59. Means JC, Passarelli AL. 2010. Viral fibroblast growth factor, matrix  
907 metalloproteases, and caspases are associated with enhancing systemic infection by  
908 baculoviruses. Proc Natl Acad Sci U S A 107:9825-9830.
- 909 60. Rojo G, Chamorro M, Salas ML, Vinuela E, Cuezva JM, Salas J. 1998. Migration of  
910 mitochondria to viral assembly sites in African swine fever virus-infected cells. J  
911 Virol 72:7583-7588.
- 912 61. Bandla MD, Campbell LR, Ullman DE, Sherwood JL. 1998. Interaction of tomato  
913 spotted wilt tospovirus (TSWV) glycoproteins with a thrips midgut protein, a

- 914 potential cellular receptor for TSWV. *Phytopathology* 88:98-104.
- 915 62. Bautista RC, Mau RFL, Cho JJ, Custer DM. 1995. Potential of tomato spotted wilt  
916 tospovirus plant hosts in Hawaii as virus reservoirs for transmission by *Frankliniella*  
917 *occidentalis* (Thysanoptera: Thripidae). *Phytopathology* 85:953-958.
- 918 63. Martin K, Kopperud K, Chakrabarty R, Banerjee R, Brooks R, Goodin MM. 2009.  
919 Transient expression in *Nicotiana benthamiana* fluorescent marker lines provides  
920 enhanced definition of protein localization, movement and interactions in planta. *Plant*  
921 *J* 59:150-162.
- 922 64. Cilia M, Fish T, Yang X, McLaughlin M, Thannhauser TW, Gray S. 2009. A  
923 comparison of protein extraction methods suitable for gel-based proteomic studies of  
924 aphid proteins. *J Biomol Tech* 20:201-215.
- 925 65. Cilia M, Tamborindeguy C, Fish T, Howe K, Thannhauser TW, Gray S. 2011.  
926 Genetics coupled to quantitative intact proteomics links heritable aphid and  
927 endosymbiont protein expression to circulative polerovirus transmission. *J Virol*  
928 85:2148-2166.
- 929 66. Dobson L, Remenyi I, Tusnady GE. 2015. CCTOP: a consensus constrained  
930 TOPology prediction web server. *Nucleic Acids Res* 43:W408-W412.
- 931 67. Nielsen H. 2017. Predicting secretory proteins with SignalP. *Methods Mol Biol*  
932 1611:59-73.
- 933 68. Ioannidou ZS, Theodoropoulou MC, Papandreou NC, Willis JH, Hamodrakas SJ.  
934 2014. CutProtFam-Pred: detection and classification of putative structural cuticular  
935 proteins from sequence alone, based on profile hidden Markov models. *Insect*  
936 *Biochem Mol Biol* 52:51-59.
- 937 69. Magkrioti CK, Spyropoulos IC, Iconomidou VA, Willis JH, Hamodrakas SJ. 2004.  
938 cuticleDB: a relational database of Arthropod cuticular proteins. *BMC Bioinformatics*

- 939 5:138.
- 940 70. Kumar S, Stecher G, Tamura K. 2016. MEGA7: molecular evolutionary genetics  
941 analysis version 7.0 for bigger datasets. *Mol Biol Evol* 33:1870-1874.
- 942 71. Schwarz R, Dayhoff M. 1979. Matrices for detecting distant relationships, p 353-358.  
943 *In* Dayhoff M (ed), Atlas of protein sequences doi:citeulike-article-id:2821320.  
944 National Biomedical Research Foundation.
- 945 72. Jones DT, Taylor WR, Thornton JM. 1992. The rapid generation of mutation data  
946 matrices from protein sequences. *Comput Appl Biosci* 8:275-282.
- 947 73. Adkins S, Choi TJ, Israel BA, Bandla MD, Richmond KE, Schultz KT, Sherwood JL,  
948 German TL. 1996. Baculovirus expression and processing of tomato spotted wilted  
949 tospovirus glycoproteins. *Phytopathology* 86:849-855.
- 950 74. Chakrabarty R, Banerjee R, Chung SM, Farman M, Citovsky V, Hogenhout SA,  
951 Tzfira T, Goodin M. 2007. PSITE vectors for stable integration or transient  
952 expression of autofluorescent protein fusions in plants: probing *Nicotiana*  
953 *benthamiana*-virus interactions. *Mol Plant Microbe Interact* 20:740-750.
- 954

**Table 1. Identification of *Frankliniella occidentalis* larval proteins bound to purified virions of *Tomato spotted wilt virus* in two-dimensional (2-D) gel overlays.**

| Spot Number | Fo Seq contig match <sup>a</sup> | Mascot score ( $P < 0.05$ ) | Percent coverage <sup>b</sup> | Number of matched peptides | Peptide sequence(s)                                                                                                                                                         | Blastx annotation <sup>c</sup> ( $E < 10^{-20}$ )   | Conserved motifs ( $E < 10^{-10}$ ) |
|-------------|----------------------------------|-----------------------------|-------------------------------|----------------------------|-----------------------------------------------------------------------------------------------------------------------------------------------------------------------------|-----------------------------------------------------|-------------------------------------|
| 1           | contig01248                      | 279                         | 37%                           | 4                          | R.AQQPYQQYLQNQQFQNYQQR.A<br>R.AAAAAPILQYSNDVNPDSFQYSYQTGDGISAQAAGFTR.N<br>K.DAEAQVVQGSYSYTPDGVVYTVNYIADENGYR.A<br>K.ALPHYNQQTATYQQQAAAYQR.P                                 | endocuticle<br>structural<br>glycoprotein           | Chitin_bind_4                       |
|             | CL4854Contig1                    | 363                         | 29%                           | 7                          | R.VFFDMTVDGQPAGR.I<br>R.ALCTGEQGFYK.G<br>R.VIPNFMCGGDFTNHNGTGGK.S<br>R.KFADENFQLK.H<br>K.HTGPGIMSMANAGPNTNGSQFFITTVK.T<br>K.TSWLDNKHVVFGSVIEGMDVVK.K<br>K.HVVFGSVIEGMDVVK.K | cyclophilin                                         | Cyclophilin_ABH                     |
| 2           | contig01248                      | 77                          | 10%                           | 1                          | K.DAEAQVVQGSYSYTPDGVVYTVNYIADENGYR.A                                                                                                                                        | endocuticle<br>structural<br>glycoprotein           | Chitin_bind_4                       |
| 3           | contig00018                      | 196                         | 25%                           | 4                          | R.FGGALGGYNLAQTSQYHIQTDEGPER.Y<br>R.LEDGTVVGTYGWVDADGYLR.L<br>R.PYYPSSTPAVSLVSSSTPR.P<br>R.PYYPTSTPAVSSSTPR.P                                                               | uncharacterized,<br>similar to<br>cuticular protein | Chitin_bind_4                       |
|             | contig14634                      | 134                         | 22%                           | 3                          | R.GYISELPGTYDANSNSVIPEYDGI AVTHNGFR.Y<br>K.AGSFGYVDPFGIR.R<br>R.VIYYNTSPGSGFQVR.K                                                                                           | uncharacterized,<br>similar to<br>cuticular protein | none identified                     |
|             | CL4900Contig1                    | 113                         | 10%                           | 3                          | R.GYISELPGTYDANSNSVIPEYDGI AVTHNGFR.Y<br>K.AGSFGYVDPFGIR.R<br>R.VIYYNTSPGSGFQVR.K                                                                                           | uncharacterized,<br>similar to<br>cuticular protein | Chitin_bind_4                       |
| 4           | CL1591Contig1                    | 76                          | 5%                            | 1                          | K.QESVYTAQAIPAISTYK.K                                                                                                                                                       | flexible cuticular<br>protein                       | Chitin_bind_4                       |
| 5           | CL1591Contig1                    | 89                          | 5%                            | 1                          | K.QESVYTAQAIPAISTYK.K                                                                                                                                                       | flexible cuticular<br>protein                       | Chitin_bind_4                       |
| 6           | CL4854Contig1                    | 615                         | 30%                           | 9                          | R.VFFDMTVDGQPAGR.I<br>R.ALCTGEQGFYK.G<br>R.VIPNFMCGGDFTNHNGTGGK.S<br>R.KFADENFQLK.H                                                                                         | cyclophilin                                         | Cyclophilin_ABH                     |



|   |               |     |     |    |                                                                                                                                                                                                                                                                                                                                                                                                                                             |                             |                              |
|---|---------------|-----|-----|----|---------------------------------------------------------------------------------------------------------------------------------------------------------------------------------------------------------------------------------------------------------------------------------------------------------------------------------------------------------------------------------------------------------------------------------------------|-----------------------------|------------------------------|
|   |               |     |     |    | K.FADENFQLK.H<br>K.FADENFQLKHTGPGIMSMANAGPNTNGSQFFITTVK.T<br>K.HTGPGIMSMANAGPNTNGSQFFITTVK.T<br>K.HVVFGSVIEGMDVVK.K<br>K.KVVVADCGQLS                                                                                                                                                                                                                                                                                                        |                             |                              |
| 7 | CL4706Contig1 | 554 | 47% | 17 | R.GNPTVEVDLVTELGLFR.A<br>R.AAVPSGASTGVHEALELR.D<br>K.AIDNVNIIAPELIK.S<br>K.EIDELMLK.L<br>K.LGANAILGVSLAVCK.A<br>K.HIADLAGNTNIIPTPAFNVIINGGSHAGNK.L<br>K.LAMQEFMILPTGASSFK.E<br>K.FGLDSTAVGDEGGFAPNILNNK.E<br>K.EGLTLIIDAIK.A<br>K.VEIGMDVAASEFYK.D<br>K.VEIGMDVAASEFYKDGQYDLDFK.N<br>K.DGQYDLDFKNPNSDK.S<br>K.LTDLYMEFIK.E<br>K.EFPMVSIEDPFDQDHWDAWTTITGK.T<br>K.TNIQIVGDDLTVTNPK.R<br>K.VNQIGSVTESIQAHLLAK.K<br>R.SGETEDTFIADLVVGLSTGQIK.T | enolase                     | Metal_binding                |
|   | contig12136   | 96  | 24% | 2  | R.QGDVVQGSYSLSVEPDGSR.R<br>R.TVEYTADPVNGFNNAVVK.D                                                                                                                                                                                                                                                                                                                                                                                           | cuticular protein           | Chitin_bind_4                |
|   | contig14594   | 102 | 3%  | 1  | R.TVDYTADPVNGFNNAVVR.K                                                                                                                                                                                                                                                                                                                                                                                                                      | nuclear cap-binding protein | *RRM_NCPB2;<br>Chitin_bind_4 |
|   | CL504Contig1  | 113 | 19% | 2  | K.AAVAVDTDYDPNPSYNYAYDIHDSLTGDAK.S<br>R.TVEYTADPVNGFNNAVVK.E                                                                                                                                                                                                                                                                                                                                                                                | cuticular protein           | Chitin_bind_4                |
| 8 | CL4706Contig1 | 407 | 43% | 15 | R.GNPTVEVDLVTELGLFR.A<br>R.AAVPSGASTGVHEALELR.D<br>K.AIDNVNIIAPELIK.S<br>K.HIADLAGNTNIIPTPAFNVIINGGSHAGNK.L<br>K.LAMQEFMILPTGASSFK.E<br>K.FGLDSTAVGDEGGFAPNILNNK.E<br>K.EGLTLIIDAIK.A<br>K.VEIGMDVAASEFYK.D<br>K.VEIGMDVAASEFYKDGQYDLDFK.N<br>K.DGQYDLDFKNPNSDK.S<br>K.LTDLYMEFIK.E<br>K.EFPMVSIEDPFDQDHWDAWTTITGK.T<br>K.TNIQIVGDDLTVTNPK.R                                                                                                | enolase                     | Metal_binding                |

|              |    |     |   |                                                      |                   |               |
|--------------|----|-----|---|------------------------------------------------------|-------------------|---------------|
|              |    |     |   | K.VNQIGSVTESIQAHLLAK.K<br>R.SGETEDTFIADLVVGLSTGQIK.T |                   |               |
| CL504Contig1 | 99 | 12% | 1 | K.AAVAVDTDYDPNPSYNYAYDIHDSLTGDAK.S                   | cuticular protein | Chitin_bind_4 |

<sup>a</sup>*de novo*-assembled contigs from *F. occidentalis* transcriptome derived by Roche 454/Sanger EST library hybrid (52)

<sup>b</sup>highest percent coverage obtained among the three picking gels used to collect protein spots for identification using ESI mass spectrometry

<sup>c</sup>NCBI Blastx search of the non-redundant protein database with the matching *Fo* nucleotide sequence contig query

\*chimeric contig (= ambiguous annotation) - domains occur in opposite orientation on different ORFs

**Table 2. Identification of *Frankliniella occidentalis* larval proteins bound to recombinant glycoprotein-N (G<sub>N</sub>) in two-dimensional (2-D) gel overlays.**

| Spot Number | Fo Seq contig match <sup>a</sup> | Mascot score ( $P < 0.05$ ) | Percent coverage <sup>b</sup> | Number of matched peptides | Peptide sequence(s)                                                                                                                                                                                                                                                                                                 | Blastx annotation <sup>c</sup> ( $E < 10^{-20}$ ) | Conserved motifs ( $E < 10^{-10}$ ) |
|-------------|----------------------------------|-----------------------------|-------------------------------|----------------------------|---------------------------------------------------------------------------------------------------------------------------------------------------------------------------------------------------------------------------------------------------------------------------------------------------------------------|---------------------------------------------------|-------------------------------------|
| 1           | CL4310Contig1                    | 595                         | 27%                           | 12                         | R.AAELSSILEER.I<br>K.NIQADEMVEFSSGLK.G<br>K.GMALNLEPDNVGIVVFGNDK.L<br>K.GMALNLEPDNVGIVVFGNDKLIK.E<br>R.TGAIVDVVPVGDLLGR.V<br>K.TALAI DTIINQQR.F<br>K.YTIIVAATASDAAPLQYLAPYSGCAMGEYFR.D<br>K.HALIIYDDL SK.Q<br>R.EAYPGDVFY LHSR.L<br>R.EVA AFAQFGSDLLDAATQQLLN.R.G<br>K.QGQYVPM AIEEQVAVIYCGVR.G<br>K.IVTDFLASFNAASK | mitochondrial<br>ATP synthase $\alpha$<br>subunit | AtpA                                |
| 2           | CL4310Contig1                    | 302                         | 12%                           | 5                          | K.GMALNLEPDNVGIVVFGNDK.L<br>R.TGAIVDVVPVGDLLGR.V<br>R.VVDALGDAIDGK.G<br>K.HALIIYDDL SK.Q<br>K.IVTDFLASFNAASK                                                                                                                                                                                                        | mitochondrial<br>ATP synthase $\alpha$<br>subunit | AtpA                                |
| 3           | CL4382Contig1                    | 633                         | 43%                           | 9                          | R.SSVVSQSVPVVSK.T<br>K.SVPQYQQYQTVSQQYQSVVVK.S<br>K.SVPQYQQYQVVK.S<br>K.SAPVYSQVHHVVEQQAAPVLLR.H<br>R.TAFVPQYDSVVSASAPK.Y<br>K.ILSQVEFDPA GIYR.V<br>R.VNFQTE NGIQAETGSVK.D<br>R.ASGAHL PQVP EIQR.S<br>R.SLELNAAQPQKYDQDGNLVSQF                                                                                      | endocuticle<br>structural<br>glycoprotein         | Chitin_bind_4                       |
| 4           | CL4382Contig1                    | 137                         | 15%                           | 3                          | R.SSVVSQSVPVVSK.T<br>K.SVPQYQQYQTVSQQYQSVVVK.S<br>R.VNFQTE NGIQAETGSVK.D                                                                                                                                                                                                                                            | endocuticle<br>structural<br>glycoprotein         | Chitin_bind_4                       |
| 5           | CL4382Contig1                    | 169                         | 22%                           | 6                          | R.SSVVSQSVPVVSK.T<br>K.SVPQYQQYQVVK.S<br>R.VNFQTE NGIQAETGSVK.D<br>R.ASGAHL PQVP EIQR.S<br>R.AAAEHGVAIVCPDTSPR.G<br>K.ACQAVNMPVVLQMR.E                                                                                                                                                                              | endocuticle<br>structural<br>glycoprotein         | Chitin_bind_4                       |
| 6           | CL4382Contig1                    | 1,154                       | 53%                           | 11                         | R.SSVVSQSVPVVSK.T<br>K.SVPQYQQYQTVSQQYQSVVVK.S                                                                                                                                                                                                                                                                      | endocuticle                                       | Chitin_bind_4                       |

|    |               |     |     |   |                                                                                                                                                                                                                                                        |                                           |               |
|----|---------------|-----|-----|---|--------------------------------------------------------------------------------------------------------------------------------------------------------------------------------------------------------------------------------------------------------|-------------------------------------------|---------------|
|    |               |     |     |   | K.SVPQYQQQVVVK.S<br>K.SAPVYSQVHHVVEQQAAPVLLR.H<br>R.HVEQEIPAYQSVQHVPVYQSVQHVAHHVAAPVSR.T<br>R.TAFVPQYDSVSVSASAQPK.Y<br>K.ILSQVQEFDPAGIYR.V<br>R.VNFQTENGIQSAETGSVK.D<br>R.VNFQTENGIQSAETGSVKDIQAK.D<br>R.ASGAHLQPVPPEIQR.S<br>R.SLELNAAPQPKYDQDGNLVSQF | structural<br>glycoprotein                |               |
| 7  | CL4382Contig1 | 413 | 74% | 8 | R.SSVVSQSVPVVSK.T<br>K.SVPQYQQYQTVSQYQSVQYQQQVVVK.S<br>K.SVPQYQQQVVVK.S<br>R.TAFVPQYDSVSVSASAQPK.Y<br>R.VNFQTENGIQSAETGSVK.D<br>R.VNFQTENGIQSAETGSVKDIQAK.D<br>R.ASGAHLQPVPPEIQR.S<br>R.SLELNAAPQPKYDQDGNLVSQF                                         | endocuticle<br>structural<br>glycoprotein | Chitin_bind_4 |
| 8  | CL4382Contig1 | 355 | 29% | 7 | R.SSVVSQSVPVVSK.T<br>K.SVPQYQQYQTVSQYQSVQYQQQVVVK.S<br>K.SVPQYQQQVVVK.S<br>R.VNFQTENGIQSAETGSVK.D<br>R.VNFQTENGIQSAETGSVKDIQAK.D<br>R.ASGAHLQPVPPEIQR.S<br>R.SLELNAAPQPKYDQDGNLVSQF                                                                    | endocuticle<br>structural<br>glycoprotein | Chitin_bind_4 |
| 9  | CL4382Contig1 | 155 | 5%  | 2 | R.VNFQTENGIQSAETGSVK.D<br>R.VNFQTENGIQSAETGSVKDIQAK.D                                                                                                                                                                                                  | endocuticle<br>structural<br>glycoprotein | Chitin_bind_4 |
| 10 | CL4382Contig1 | 130 | 4%  | 1 | R.VNFQTENGIQSAETGSVK.D                                                                                                                                                                                                                                 | endocuticle<br>structural<br>glycoprotein | Chitin_bind_4 |
| 11 | CL4382Contig1 | 150 | 13% | 7 | R.SSVVSQSVPVVSK.T<br>K.SVPQYQQYQTVSQYQSVQYQQQVVVK.S<br>K.SVPQYQQQVVVK.SR.VNFQTENGIQSAETGSVK.D<br>R.TAFVPQYDSVSVSASAQPK.Y<br>R.VNFQTENGIQSAETGSVK.D<br>R.VNFQTENGIQSAETGSVKDIQAK.D<br>R.ASGAHLQPVPPEIQR.S                                               | endocuticle<br>structural<br>glycoprotein | Chitin_bind_4 |

<sup>a</sup>*de novo*-assembled contigs from *F. occidentalis* transcriptome derived by Roche 454/Sanger EST library hybrid (52)

<sup>b</sup>highest percent coverage obtained among the three picking gels used to collect protein spots for identification using ESI mass spectrometry

<sup>c</sup>NCBI Blastx search of the non-redundant protein database with the matching *Fo* nucleotide sequence contig query



**Table 3. Final candidate list of six TSWV-interacting proteins (TIPs)<sup>a</sup> from larval *Frankliniella occidentalis* to move forward to validation and biological characterization.**

| Putative protein                                                            | Fo Seq contig match <sup>b</sup> | ORF length <sup>c</sup><br>(nt/aa) | Signal peptide <sup>d</sup><br>(aa position) | Conserved domains <sup>e</sup>                     |                                        |                                                                          | Top Genbank match <sup>f</sup><br>(% coverage, % identity, E)                                                                       |
|-----------------------------------------------------------------------------|----------------------------------|------------------------------------|----------------------------------------------|----------------------------------------------------|----------------------------------------|--------------------------------------------------------------------------|-------------------------------------------------------------------------------------------------------------------------------------|
|                                                                             |                                  |                                    |                                              | Name                                               | Position<br>(aa)                       | E-value                                                                  |                                                                                                                                     |
| Cuticular protein-V (CP-V)                                                  | CL4900Contig1                    | 1,302/434                          | 1-18                                         | Chitin_bind_4                                      | 447-92                                 | 5.7x10 <sup>-6</sup>                                                     | XP_017786818.1: PREDICTED: cell surface glycoprotein 1 [ <i>Nicrophorus vespilloides</i> ] (94%, 44%, 1x10 <sup>-85</sup> )         |
| Endocuticle structural glycoprotein-G <sub>N</sub> (endoCP-G <sub>N</sub> ) | CL4382Contig1                    | 852/283                            | 1-15                                         | Chitin_bind_4                                      | 190-246                                | 7.5x10 <sup>-11</sup>                                                    | XP_018334183.1: endocuticle structural glycoprotein SgAbd-2-like [ <i>Agrilus planipennis</i> ] (33%, 53%, 4x10 <sup>-22</sup> )    |
| Endocuticle structural glycoprotein-V (endoCP-V)                            | contig01248                      | 522/173                            | 1-17                                         | Chitin_bind_4                                      | 63-119                                 | 1.4x10 <sup>-18</sup>                                                    | XP_022906571.1: endocuticle structural glycoprotein SgAbd-2-like [ <i>Onthophagus taurus</i> ] (63%, 58%, 2x10 <sup>-35</sup> )     |
| Cyclophilin (peptidyl-prolyl cis-trans isomerase)                           | CL4854Contig1                    | 618/205                            | None                                         | cyclophilin_ABH_<br>like<br>PpiB<br>Pro_isomerase  | 44-202<br>57-196<br>47-201             | 2.3x10 <sup>-120</sup><br>2.6x10 <sup>-63</sup><br>1.2x10 <sup>-62</sup> | XP_019753975.1: PREDICTED: peptidyl-prolyl cis-trans isomerase [ <i>Dendroctonus ponderosae</i> ] (99%, 75%, 2x10 <sup>-109</sup> ) |
| Enolase                                                                     | CL4706Contig1                    | 1,302/433                          | None                                         | PLN00191<br>enolase<br>Eno<br>Enolase_C            | 3-433<br>5-417<br>6-431<br>143-433     | 0<br>0<br>0<br>0                                                         | XP_019767728.1: PREDICTED: enolase-like [ <i>Dendroctonus ponderosae</i> ] (99%, 87%, 0)                                            |
| Mitochondrial ATP synthase $\alpha$                                         | CL4310Contig1                    | 1,665/554                          | None                                         | PRK09281<br>AtpA<br>F1_ATPase_alpha<br>ATP-synt_ab | 45-551<br>45-553<br>135-416<br>190-413 | 0<br>0<br>0<br>6.1x10 <sup>-117</sup>                                    | XP_023718907.1: ATP synthase subunit alpha, mitochondrial [ <i>Cryptotermes secundus</i> ] (99%, 89%, 0)                            |

<sup>a</sup>sequences deposited into National Center for Biotechnology Information (NCBI) GenBank with the following accessions: CP-V (MH884758), endoCP-G<sub>N</sub> (MH884757), endoCP-V (MH884756), cyclophilin (MH884760), enolase (MH884759), and mitochondrial ATP synthase  $\alpha$  (MH884761).

<sup>b</sup>*de novo*-assembled contigs from *F. occidentalis* transcriptome derived by Roche 454/Sanger EST library hybrid (52)

<sup>c</sup>prediction by NCBI ORF Finder (<https://www.ncbi.nlm.nih.gov/orffinder/>)

<sup>d</sup>prediction by Signal P (<http://www.cbs.dtu.dk/services/SignalP/>)

<sup>e</sup>prediction by NCBI Batch Web CD Search Tool (<https://www.ncbi.nlm.nih.gov/Structure/bwrpsb/bwrpsb.cgi>) (CDSEARCH/cdd v3.16); E-value cut-off =  $10^{-5}$ , only specific hits shown

<sup>f</sup>Blastp search of NCBI nr protein database against TIP ORF as of August 06, 2018; top match indicates highest alignment (max) score

1 **Figure Legends**

2

3 **Fig 1. Overlay assay using purified virions and *F. occidentalis* first instar proteins**  
4 **resolved in two-dimensional gels.**

5 Total proteins (150 µg) extracted from pooled healthy first instar larvae (0-17-hour old) of *F.*  
6 *occidentalis* were resolved by 2-D gel electrophoresis and transferred to nitrocellulose  
7 membranes. After blocking, membranes were incubated overnight with (A) blocking buffer  
8 (negative control) or (B) purified TSWV at 25 µg/mL, and then incubated with polyclonal  
9 rabbit anti-TSWV G<sub>N</sub> antiserum. Only protein spots that consistently bound to purified  
10 TSWV in three (spots 1, 2, 4, 6, and 7) and four (spots 3, 5, and 8) biological replicates of the  
11 overlay assay were collected from three individual picking gels and subjected to ESI mass  
12 spectrometry for protein identification. Protein spots observed in the no-overlay-control  
13 membrane represent non-specific binding and were not collected for further analysis.  
14 Molecular mass (in kilodaltons) is shown on the Y axis and pI (as pH range) is shown on the  
15 X axis.

16

17 **Fig 2. Overlay assay using recombinant G<sub>N</sub> and *F. occidentalis* first instar proteins**  
18 **resolved in two-dimensional gels.**

19 150 µg total proteins extracted from pooled healthy first instar larvae (0-17-hour old) of *F.*  
20 *occidentalis* were resolved by 2-D gel electrophoresis and transferred to nitrocellulose  
21 membranes. The membranes were incubated overnight with (A) blocking buffer (negative  
22 control) or (B) recombinant TSWV G<sub>N</sub> (3.5 µg/mL). Using the polyclonal rabbit anti-TSWV  
23 G<sub>N</sub>, protein spots that consistently bound to the recombinant TSWV G<sub>N</sub> in two (spots 1  
24 through 11) biological replicates of the overlay assay were collected from two individual  
25 picking gels and subjected to ESI mass spectrometry for protein identification. Protein spots



26 observed in the no-overlay-control membrane represent non-specific binding and were not  
27 collected for further analysis. Molecular mass (in kilodaltons) is shown on the Y axis and pI  
28 (as pH range) is shown on the X axis.

29

30 **Fig. 3 Antisera specificity against each TSWV-interacting protein (TIP) (peptide) using**

31 **dot blot analysis.** Peptides that were used for producing its antibody were diluted to 100

32  $\mu\text{g}/\text{mL}$  (for cyclophilin, enolase, endoCP-G<sub>N</sub>, endoCP-V, and mATPase), and 2.5 mg/mL (for

33 CP-V), and 2ul of each peptide were used for each test. PBS buffer and pre-immune serum

34 (500,000  $\times$  dilution) were used as controls. All six diluted peptides and two controls were

35 loaded onto six nitrocellulose membrane strips. Each strip was first incubated with one

36 specific primary antibody (0.5  $\mu\text{g}/\text{mL}$ , generated in mice), then incubated with goat anti-

37 mouse-HRP (1:5,000 dilution). Each membrane strip was developed independently.

38

39 **Fig 4. Immunolabeling of TSWV-interacting proteins (TIPs) within first instar larvae of**  
40 ***F. occidentalis*.** The synchronized first instar larvae (0-17-hour old) were kept on 7% sucrose  
41 solution for 3 hours to clean their guts from plant tissues. These larvae were then dissected  
42 and immunolabeled using specific antibodies against each TIP as indicated. Thrips tissues  
43 incubated with pre-immune mouse serum are depicted here. Confocal microscopy detection  
44 of green fluorescence (Alexa Fluor 488) represents the localization of each TIP. TIPs were  
45 mainly localized at foregut (FG), midgut (MG), which includes epithelial cells and visceral  
46 muscle (VM), principle salivary glands (PSG), tubular salivary glands (TSG), and  
47 Malpighian tubules (MT). All scale bars are equal to 50  $\mu\text{m}$ .

48

49 **Fig 5. Confirmation of interactions between TSWV proteins and TSWV-interacting**  
50 **proteins (TIPs) using bimolecular fluorescence complementation (BiFC) in *Nicotiana***  
51 ***benthamiana*.** Plants transgenic for a nuclear marker fused to cyan fluorescent protein (CFP-  
52 H2B) were infiltrated with suspensions of *Agrobacterium tumefaciens* transformed with  
53 plasmids encoding the  $G_N$  protein (full length or soluble form,  $G_N$ -S) and TIPs proteins  
54 (EndoCP- $G_N$ , CP-V, Cyclophilin, mATPase, Enolase, EndoCp-V) fused to either the amino  
55 or carboxy terminus of yellow fluorescent protein (YFP). The designation of Y indicates this  
56 is the n-terminal half of YFP and FP represents the c-terminal half of YFP. The Y or FP  
57 position in the name indicates all are carboxy terminal fusions to the protein of interest. The  
58 positive interactors are seen by fluorescence of YFP in images shown in the 'BiFC' column.  
59 The 'CFP-H2B' column is indicated to give cellular reference, and the overlay between the  
60 two is also shown. The final column is the nucleus enlarged to show detail of the interacting  
61 TIPs within the cellular context. The first row is a representative negative control with a TIP  
62 and glutathione S-transferase (all thrips and virus proteins were tested with the negative  
63 control to rule out non-specific interactions). All scale bars are equal to 20  $\mu\text{m}$ .

64

65 **Fig 6. Validation of TSWV-interacting proteins (TIPs) with  $G_N$ , and identification of the**

66 **interacting domain of endoCP- $G_N$  using split-ubiquitin membrane-based yeast two**

67 **hybrid (MbY2H).** (A) Interactions between  $G_N$  and six TIPs.  $G_N$  was expressed as  $G_N$ -Cub,

68 and TIPs were expressed as NubG-TIPs using MbY2H vectors. (B) Interactions between

69 TSWV  $G_N$  and different regions of endoCP- $G_N$ . EndoCP- $G_N$  was expressed as either the N-

70 terminal domain (amino acids 1-176 and 1-189) that includes the non-conserved region or the

71 C-terminal region (amino acids 177-284 and 190-284) that includes the conserved

72 Chitin\_bind\_4 motif (CHB4) of endoCP- $G_N$ . Interactions between  $G_N$ -Cub and NubI,  $G_N$ -

73 Cub and NubG were used as positive and negative controls respectively for all MbY2H

74 assays. Co-transformation of pTSU2-APP and pNubG-Fe65 into NYM51 was used as

75 another positive control (data not shown); DDO = yeast double dropout (SD/-Leu/-Trp)

76 media, and QDO = yeast quadruple dropout (SD/-Ade/-His/-Leu/-Trp) media.

77

78 **Figure 7. Co-localization of TSWV  $G_N$  and endoCP- $G_N$  or cyclophilin in insect cells.**

79 Open reading frames of cyclophilin, endoCP- $G_N$ , and TSWV  $G_N$  were cloned into

80 *Drosophila* gateway vectors (with Hsp70 promotor and gateway cloning cassette), and the

81 pHWR and pHWG expression plasmids were used for the following fusion proteins:

82 cyclophilin-RFP, endoCP- $G_N$ -RFP and TSWV  $G_N$ -GFP. The recombinant plasmids, pHWR-

83 cyclophilin, pHWR-endoCP- $G_N$  and pHWG-TSWV  $G_N$  were single or co-transfected into

84 insect Sf9 cells. All transfection reactions were performed using Cellfectin II Reagent. The

85 mock, no DNA treatment (top left panels) and co-transfection of pHWR and pHGW

86 expression plasmids (bottom left panels) were used as controls. Cells were stained with DAPI

87 72- hours post-transfection, and then visualized using the Cytation 5 Cell Imaging Multi-

88 Mode Reader (BioTek, Winooski, VT) to detect red and green fluorescence. The exposure

89 settings (LED intensity/integration time/camera gain) of the mock were set up as the baseline  
90 parameters for image analysis, and treatments were set no more than the mock settings. Cells  
91 were visualized with the 40x objective, and each scale bar represents 10  $\mu\text{m}$ .

92 **Supporting Information**

93 **Fig. S1 Phylogenetic analysis of cuticle protein (CP) R&R consensus sequences in first**

94 **instar larvae of *F. occidentalis*.** The Neighbor-Joining (NJ) method was performed with the

95 Jones Taylor Thornton (JTT) matrix-based method for amino acid substitutions with Gamma

96 distribution to model the variation among sites. The bootstrap consensus tree (500 replicates)

97 was generated by the NJ algorithm with pairwise deletion for handling gaps. Branches

98 corresponding to partitions reproduced in less than 70% bootstrap replicates were collapsed.

99 The numbers shown next to branches indicate the percentage of replicate trees in which the

100 associated taxa (sequences) clustered together in the bootstrap test. The analysis involved 46

101 sequences – the three cuticular TSWV-interacting proteins (TIPs: cuticle protein-V (CP-V),

102 endocuticle structural glycoprotein-V (endoCP-V) and endocuticle structural glycoprotein-G<sub>N</sub>

103 (endoCP-G<sub>N</sub>) (blue text), the ‘gold-standard’ Pfam database extended R&R consensus

104 sequence (pf00379), 19 insect orthologous sequences obtained from NCBI GenBank, and 23

105 structural CPs and endoCPs (translated transcripts, designated with FOCC or CUFF

106 identifiers) previously reported to be differentially-expressed in whole bodies of TSWV-

107 infected L1s of *F. occidentalis* (27). There were 95 amino-acid positions in the final dataset.

108 RR1 and RR2 = Cuticle Protein Rebers and Riddiford (CPR family, RR1 and RR2 types)

109 extended consensus, a conserved chitin-binding motif (chitin\_bind\_4 = CHB4).

110

111 **Fig. S2 Individual channels of immune-labeled TSWV-interacting proteins (TIPs)**

112 **within first instar larvae of *F. occidentalis*.** The synchronized first instar larvae (0-17-hour

113 old) were dissected and immunolabeled using specific antibodies against each TIP as

114 indicated. Thrips tissues incubated with pre-immune mouse antiserum as controls are

115 depicted here. Confocal microscopy detected green fluorescence (Alexa Fluor 488) that

116 represents the localization of each TIP, red represents Alexa Fluor 594 labeled actin; blue

117 represents DAPI labeled nuclei. All scale bars are equal to 50  $\mu$ M.

118

119 **Fig. S3 Localization of TSWV-interacting proteins (TIPs) fused to green fluorescent**

120 **protein (GFP) in *Nicotiana benthamiana*. Plants** transgenic for an RFP-ER marker were

121 infiltrated with *Agrobacterium tumefaciens* strain LBA 4404 suspensions of TIPs constructs.

122 Each row indicates the specific TIP-GFP fusion in relation to the RFP-ER marker. The

123 columns are as follows: GFP channel, RFP channel and the overlay between the two

124 channels. All scale bars are equal to 20  $\mu$ m.

125

126 **Fig. S4. Co-expression of fusion proteins in Sf9 insect cells.** Three control sets of

127 recombinant plasmids were co-transfected into insect Sf9 cells to ensure that unfused

128 autofluorescent proteins do not alter protein localization (cyclophilin, endo-CP-G<sub>N</sub>, and G<sub>N</sub>),

129 pHWR-cyclophilin and pHGW (expression of cyclophilin-RFP and GFP); pHWR-endoCP-

130 G<sub>N</sub> and pHGW (expression of endoCP-G<sub>N</sub>-RFP and GFP); pHRW and pHWG-TSWV G<sub>N</sub>

131 (expression of RFP and TSWV G<sub>N</sub>-GFP). All transfection reactions were performed using

132 Cellfectin II Reagent, and cells were stained with DAPI at 72 hours post transfection. The red

133 and green fluorescence were detected by Cytation 5 Cell Imaging Multi-Mode Reader. The

134 exposure settings (LED intensity/integration time/camera gain) of mock were set up as the

135 baseline, and different treatments were set no more than the mock settings. Each scale bar

136 represents 10  $\mu$ m.

137

138

139

140

141

10

pH

3

10

pH

3

**A****B**

250 kDa

150 kDa

100 kDa

75 kDa

50 kDa

37 kDa

25 kDa

20 kDa

15 kDa

10 kDa

7 → ← 8

← 5

← 4

← 3

1 →

← 6

↑ 2

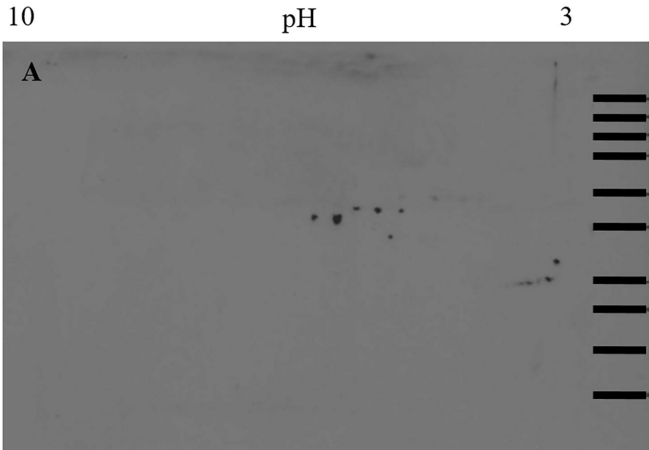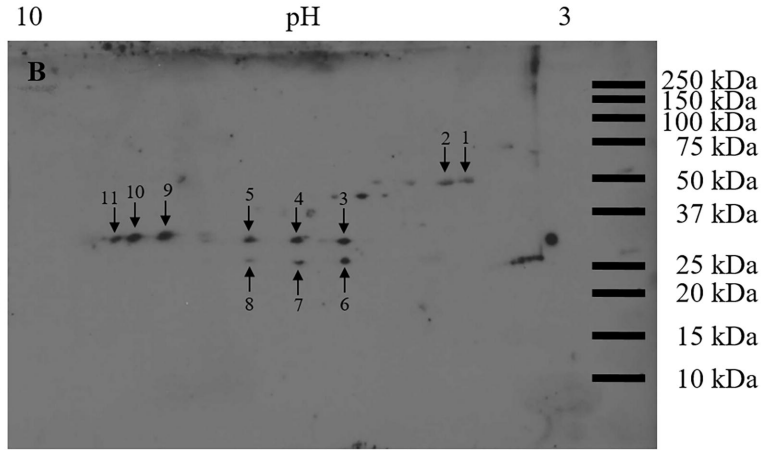



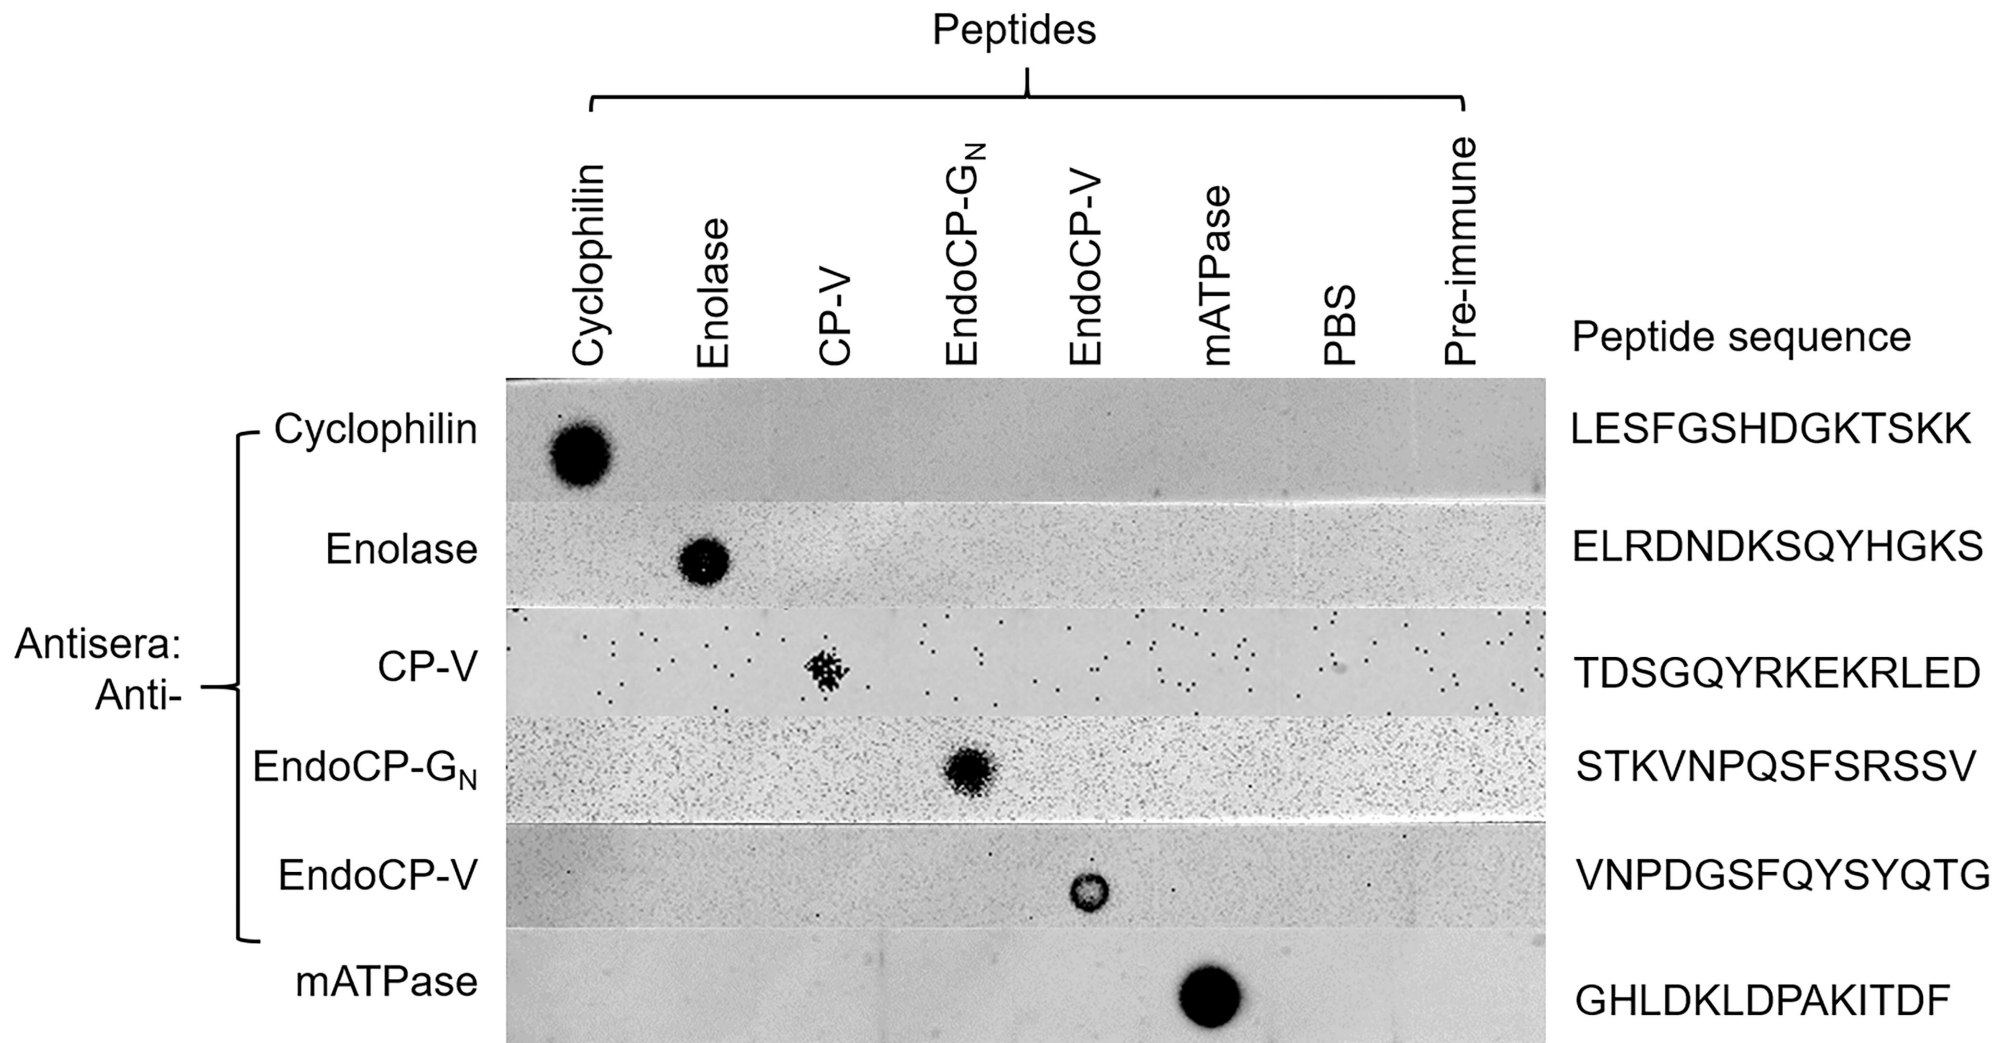

Pre-immune serum control

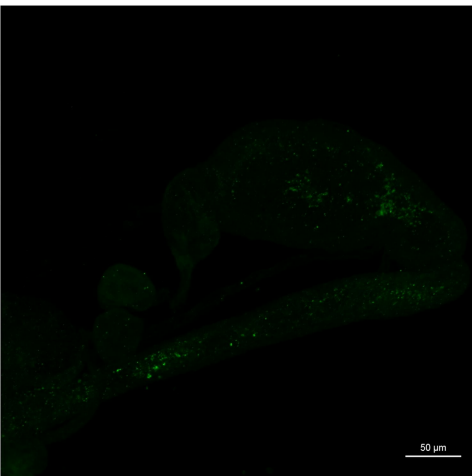

Cyclophilin

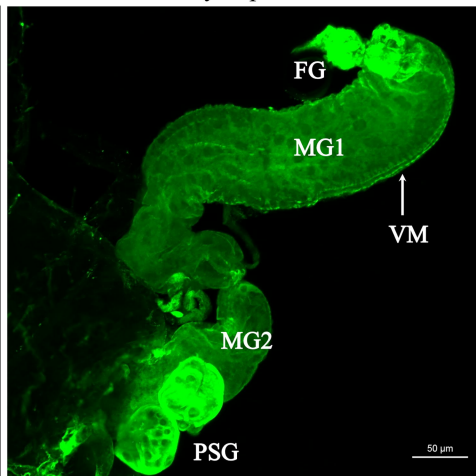

Enolase

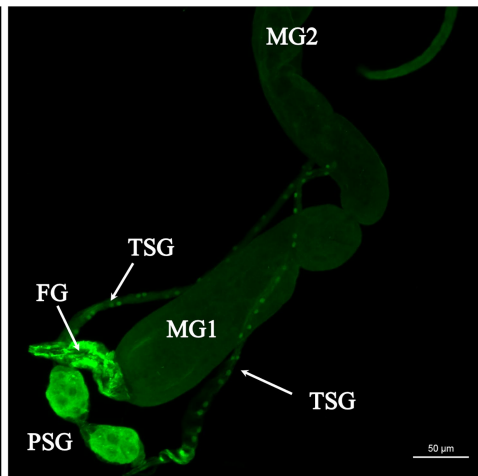

CP-V

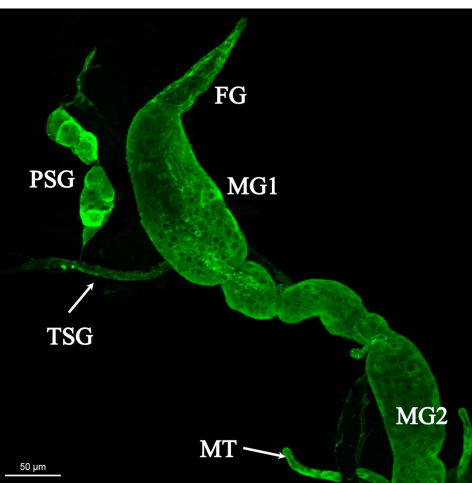EndoCP-G<sub>N</sub>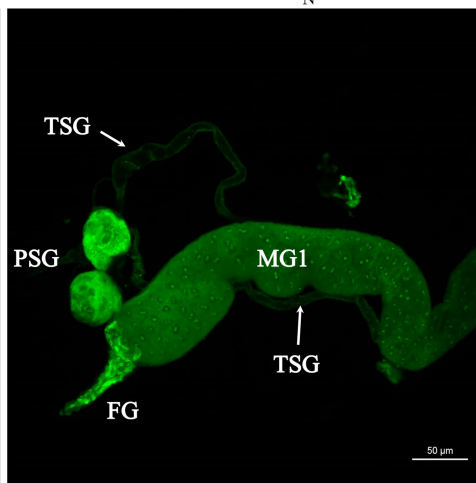

EndoCP-V

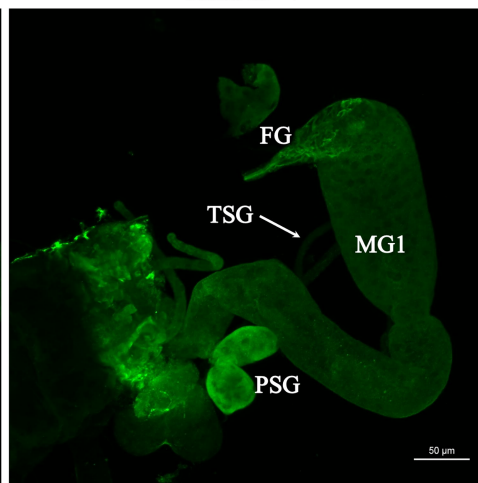

BiFC

CFP-H2B

OVERLAY

NUCLEUS

EndoCP-G<sub>N</sub><sup>Y</sup>  
/GST<sup>FP</sup>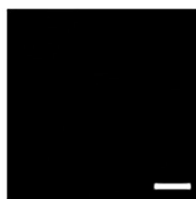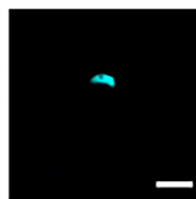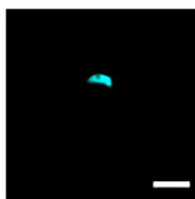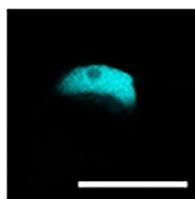CP-V<sup>Y</sup>  
/G<sub>N</sub><sup>FP</sup>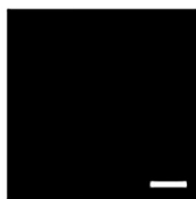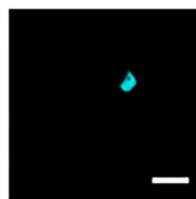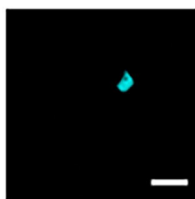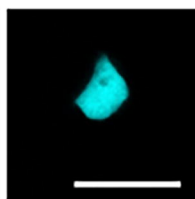G<sub>N</sub><sup>Y</sup>  
/Cyclophilin<sup>FP</sup>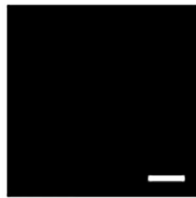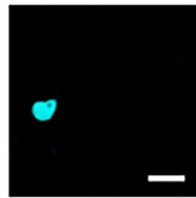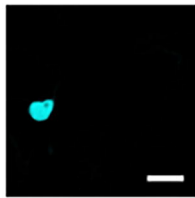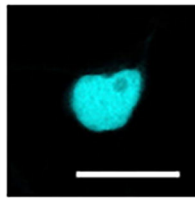mATPase<sup>Y</sup>  
/G<sub>N</sub>S<sup>FP</sup>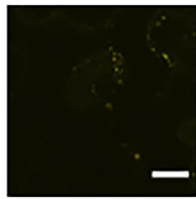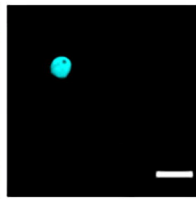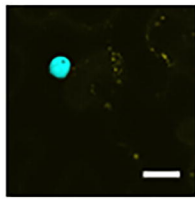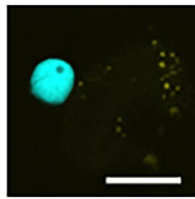G<sub>N</sub><sup>Y</sup>  
/Enolase<sup>FP</sup>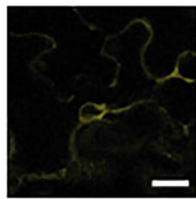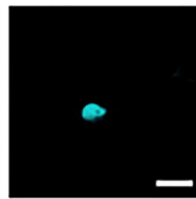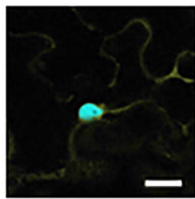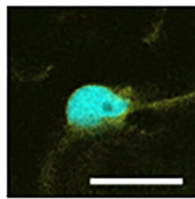EndoCP-G<sub>N</sub><sup>Y</sup>  
/G<sub>N</sub><sup>FP</sup>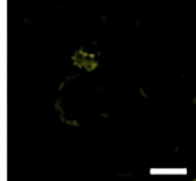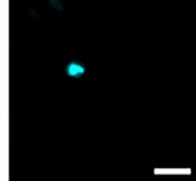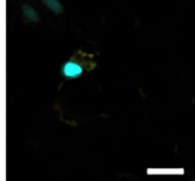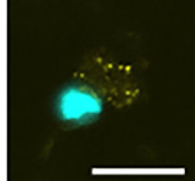EndoCP-V<sup>Y</sup>  
/G<sub>N</sub>S<sup>FP</sup>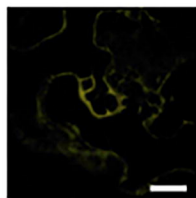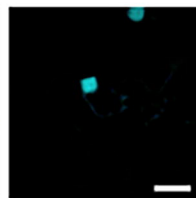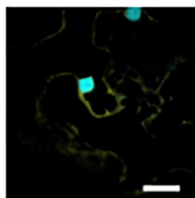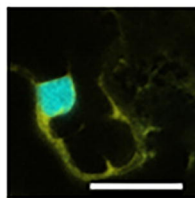EndoCP-V<sup>Y</sup>  
/G<sub>N</sub><sup>FP</sup>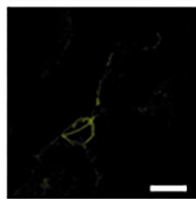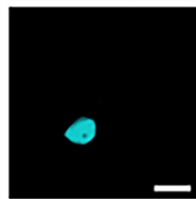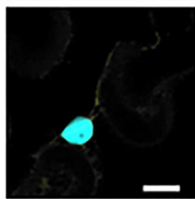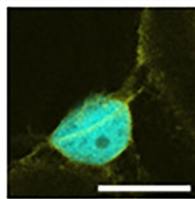

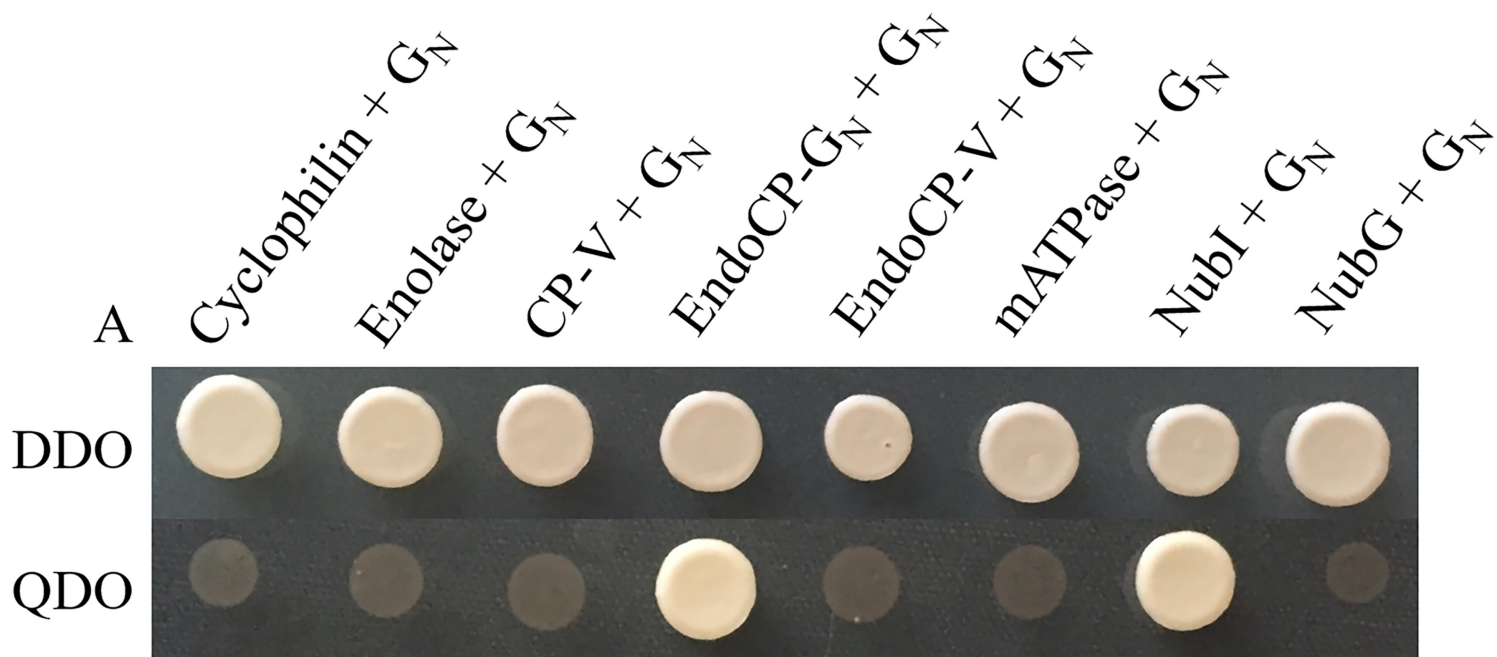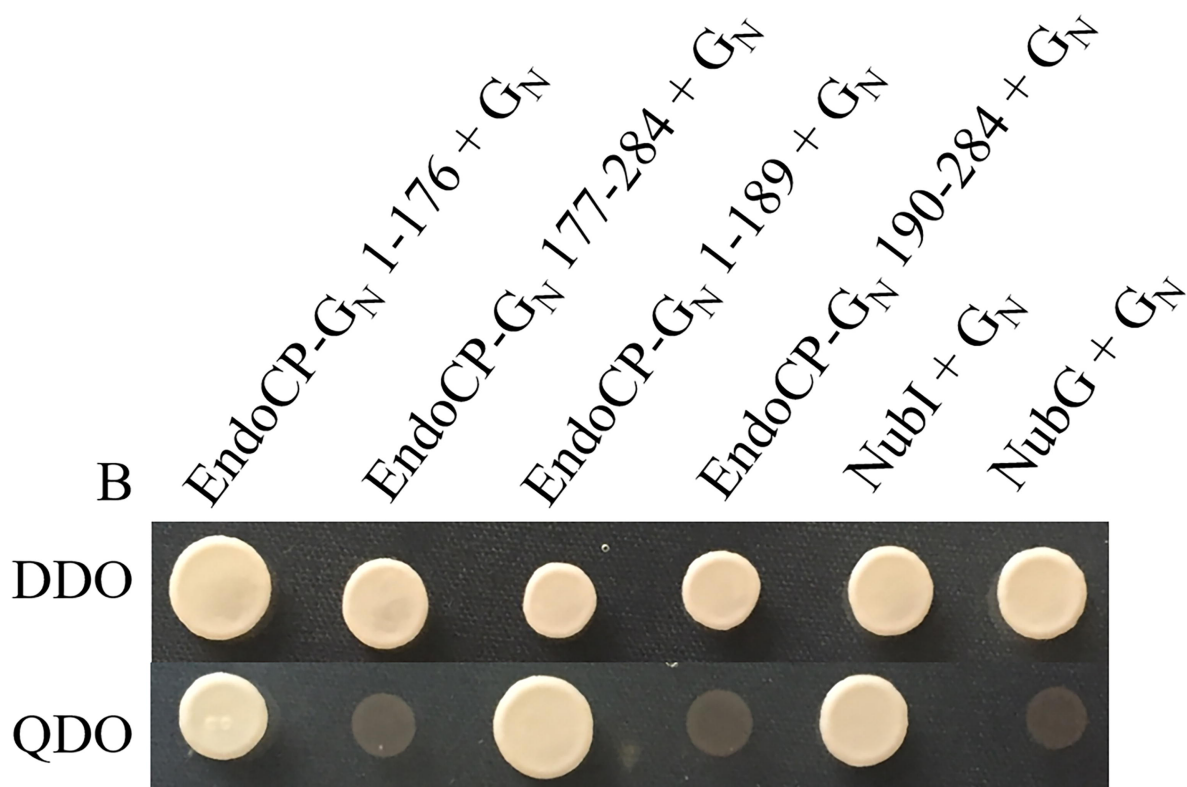

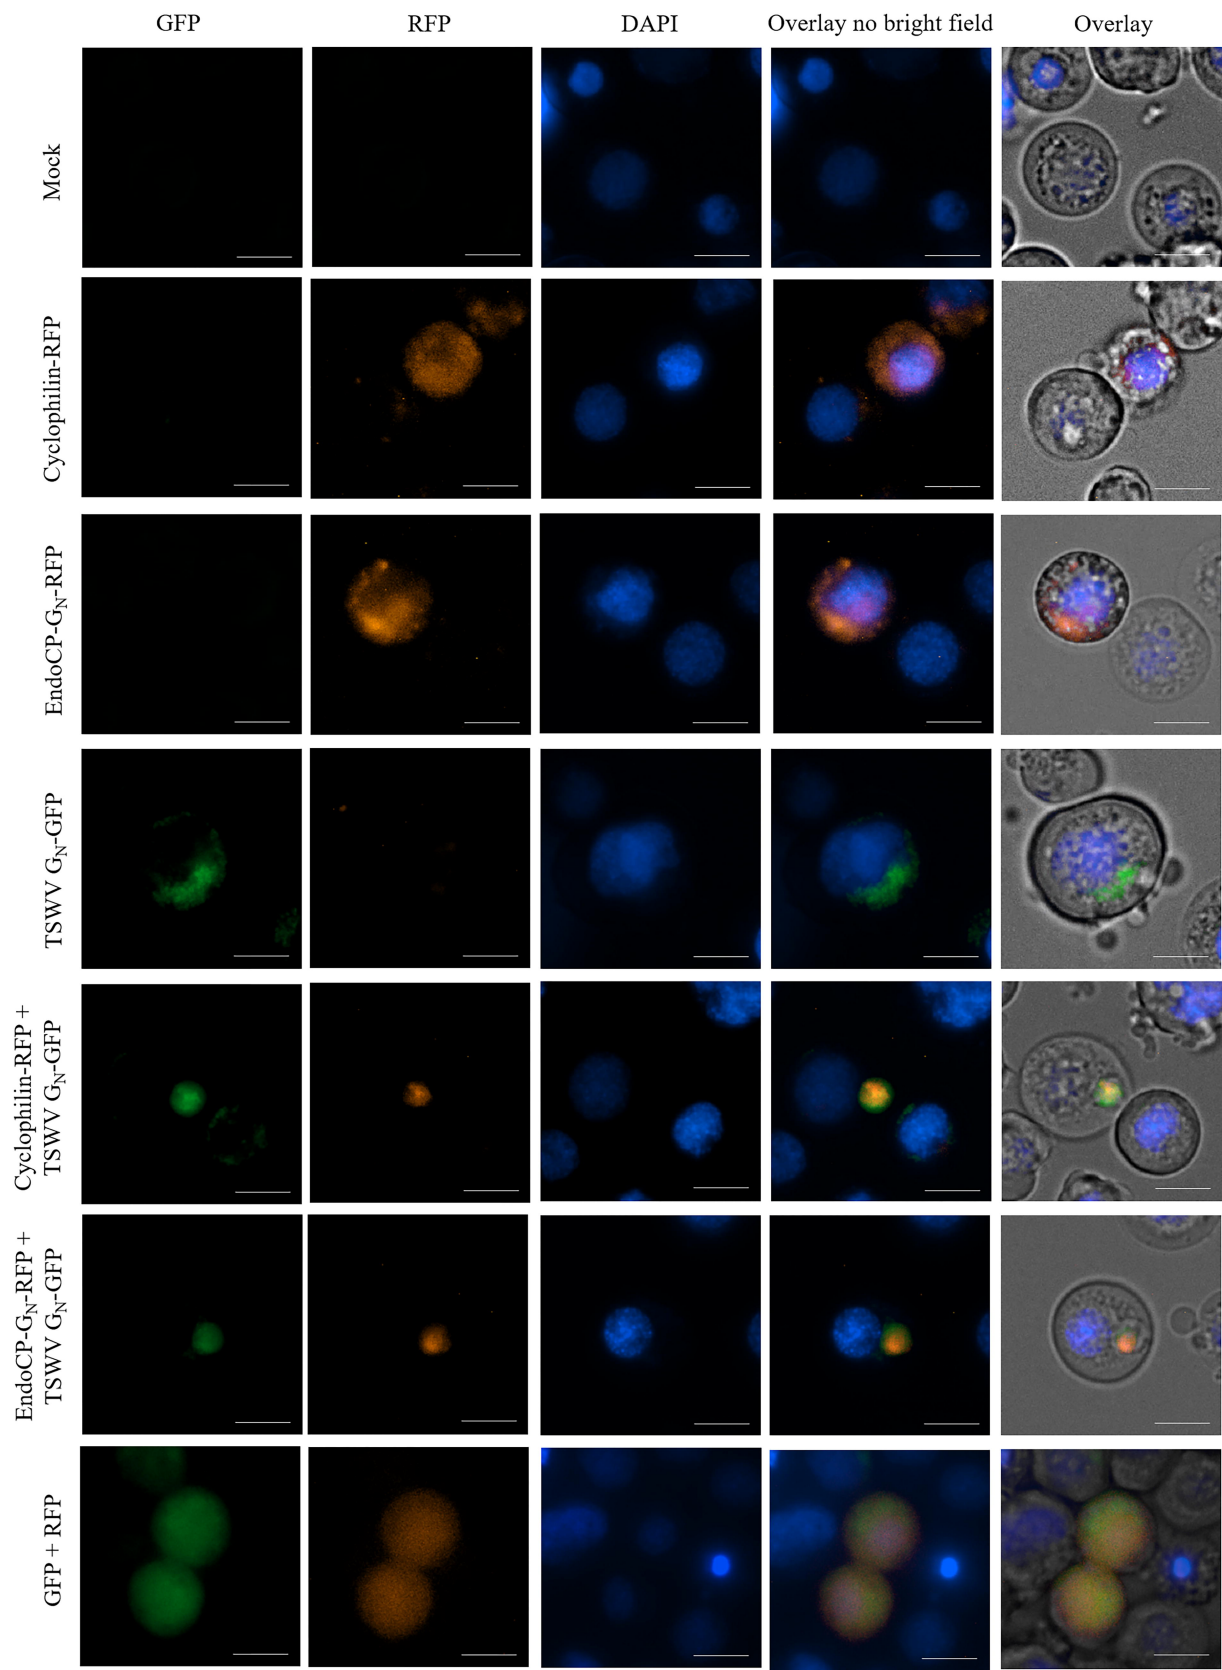

Source: https://www.biorxiv.org/content/10.1101/416560v2.full.pdf
